# Supplementary material for: Mitochondrial genome insights into the spatio-temporal distribution and genetic diversity of Dendrobium hancockii Rolfe (Orchidaceae)
Source: Frontiers journal article supplement (doi:10.3389/fpls.2024.1469267), 2024-10-22
Supplement: Data_Sheet_1.ZIP [file Data_Sheet_1.ZIP]

## Sheet: atp1
Seq 1	Seq 2	SynDif	SynPos	Ks	NSynDif	NSynPos	Ka	Ka/Ks
G.elata_at	A.thaliana	54.00	347.75	0.174	48.00	1053.25	0.047	0.270115
G.elata_at	Z.mays_atp	38.50	347.25	0.12	35.50	1053.75	0.0345	0.2875
G.elata_at	G.biloba_a	68.00	350.25	0.2247	55.00	1050.75	0.0543	0.241656
G.elata_at	F.gracilis	53.50	349.67	0.1711	35.50	1051.33	0.0346	0.202221
G.elata_at	C.sinensis	75.50	349.5	0.2548	40.50	1051.5	0.0395	0.155024
G.elata_at	C.taitunge	66.50	353.83	0.2164	68.50	1047.17	0.0684	0.316081
G.elata_at	P.nudum_at	164.92	350.17	0.7416	116.08	1050.83	0.1195	0.161138
G.elata_at	O.sativa_a	31.00	347.83	0.0949	31.00	1053.17	0.03	0.316122
G.elata_at	A.officina	24.00	346.67	0.0726	38.00	1054.33	0.0369	0.508264
G.elata_at	M.baccata_	59.50	350.42	0.1925	38.50	1050.58	0.0376	0.195325
G.elata_at	V.vinifera	45.00	350.33	0.1409	34.00	1050.67	0.0331	0.234918
G.elata_at	C.coggygri	49.00	349.58	0.1552	30.00	1051.42	0.0291	0.1875
G.elata_at	O.fragrans	55.50	348.67	0.1789	40.50	1052.33	0.0395	0.220794
G.elata_at	C.quinoa_a	67.00	349.75	0.2212	41.00	1051.25	0.0401	0.181284
G.elata_at	C.japonica	58.00	349.33	0.1877	47.00	1051.67	0.0461	0.245605
G.elata_at	B.juncea_a	55.00	348	0.1775	47.00	1053	0.046	0.259155
G.elata_at	B.umbellat	104	350.25	0.378	64.00	1050.75	0.0635	0.167989
G.elata_at	F.hygromet	140.25	347.42	0.5796	101.75	1053.58	0.1034	0.178399
G.elata_at	C.tinctori	60.00	348.33	0.1957	35.00	1052.67	0.034	0.173735
G.elata_at	S.miltiorr	75.00	349	0.2532	54.00	1052	0.0532	0.210111
G.elata_at	C.sativa_a	47.00	349.25	0.1483	34.00	1051.75	0.033	0.222522
G.elata_at	G.max_atp1	60.50	349.67	0.1967	38.50	1051.33	0.0375	0.190646
G.elata_at	D.hancocki	8.00	348.17	0.0233	12.00	1052.83	0.0115	0.493562
G.elata_at	D.officina	10.00	348.17	0.0293	13.00	1052.83	0.0125	0.426621
G.elata_at	D.huoshane	9.00	348.17	0.0263	13.00	1052.83	0.0125	0.475285
A.thaliana	Z.mays_atp	65.50	344.83	0.219	36.50	1056.17	0.0354	0.161644
A.thaliana	G.biloba_a	72.50	347.83	0.2442	60.50	1053.17	0.0598	0.244881
A.thaliana	F.gracilis	30.00	347.25	0.0918	33.00	1053.75	0.032	0.348584
A.thaliana	C.sinensis	61.50	347.08	0.2021	39.50	1053.92	0.0384	0.190005
A.thaliana	C.taitunge	76.00	351.42	0.2551	78.00	1049.58	0.0783	0.306938
A.thaliana	P.nudum_at	167.58	347.75	0.7716	117.42	1053.25	0.1207	0.156428
A.thaliana	O.sativa_a	59.50	345.42	0.1957	32.50	1055.58	0.0314	0.16045
A.thaliana	A.officina	51.50	344.25	0.1669	55.50	1056.75	0.0544	0.325944
A.thaliana	M.baccata_	36.00	348	0.1113	34.00	1053	0.033	0.296496
A.thaliana	V.vinifera	27.50	347.92	0.0835	35.50	1053.08	0.0345	0.413174
A.thaliana	C.coggygri	28.50	347.17	0.0869	29.50	1053.83	0.0285	0.327963
A.thaliana	O.fragrans	28.50	346.25	0.0872	36.50	1054.75	0.0354	0.405963
A.thaliana	C.quinoa_a	48.00	347.33	0.1527	34.00	1053.67	0.033	0.21611
A.thaliana	C.japonica	30.50	346.92	0.0935	39.50	1054.08	0.0384	0.410695
A.thaliana	B.juncea_a	1.00	345.58	0.0029	1.00	1055.42	0.0009	0.310345
A.thaliana	B.umbellat	109	347.83	0.4057	73.00	1053.17	0.0727	0.179196
A.thaliana	F.hygromet	146.67	345	0.6275	99.33	1056	0.1005	0.160159
A.thaliana	C.tinctori	34.50	345.92	0.107	32.50	1055.08	0.0315	0.294393
A.thaliana	S.miltiorr	51.00	346.58	0.1638	43.00	1054.42	0.0419	0.2558
A.thaliana	C.sativa_a	27.50	346.83	0.0838	27.50	1054.17	0.0266	0.317422
A.thaliana	G.max_atp1	37.00	347.25	0.1149	35.00	1053.75	0.034	0.295909
A.thaliana	D.hancocki	49.00	345.75	0.1571	42.00	1055.25	0.0409	0.260344
A.thaliana	D.officina	49.00	345.75	0.1571	43.00	1055.25	0.0419	0.266709
A.thaliana	D.huoshane	50.00	345.75	0.1607	43.00	1055.25	0.0419	0.260734
Z.mays_atp	G.biloba_a	84.00	347.33	0.292	46.00	1053.67	0.045	0.15411
Z.mays_atp	F.gracilis	66.50	346.75	0.2215	26.50	1054.25	0.0256	0.115576
Z.mays_atp	C.sinensis	87.00	346.58	0.3056	29.00	1054.42	0.028	0.091623
Z.mays_atp	C.taitunge	83.00	350.92	0.2842	63.00	1050.08	0.0625	0.219916
Z.mays_atp	P.nudum_at	166.58	347.25	0.7655	101.42	1053.75	0.103	0.134553
Z.mays_atp	O.sativa_a	16.00	344.92	0.0479	7.00	1056.08	0.0067	0.139875
Z.mays_atp	A.officina	37.00	343.75	0.1162	38.00	1057.25	0.0368	0.316695
Z.mays_atp	M.baccata_	69.00	347.5	0.2307	29.00	1053.5	0.028	0.12137
Z.mays_atp	V.vinifera	55.50	347.42	0.1796	22.50	1053.58	0.0217	0.120824
Z.mays_atp	C.coggygri	62.00	346.67	0.2043	20.00	1054.33	0.0192	0.0939794
Z.mays_atp	O.fragrans	68.00	345.75	0.2281	24.00	1055.25	0.0231	0.101271
Z.mays_atp	C.quinoa_a	79.50	346.83	0.2736	26.50	1054.17	0.0256	0.0935673
Z.mays_atp	C.japonica	67.00	346.42	0.2237	26.00	1054.58	0.0251	0.112204
Z.mays_atp	B.juncea_a	65.50	345.08	0.2188	37.50	1055.92	0.0364	0.166362
Z.mays_atp	B.umbellat	106	347.33	0.3918	55.00	1053.67	0.0541	0.138081
Z.mays_atp	F.hygromet	150.67	344.5	0.6562	82.33	1056.5	0.0823	0.125419
Z.mays_atp	C.tinctori	71.50	345.42	0.2422	23.50	1055.58	0.0226	0.0933113
Z.mays_atp	S.miltiorr	88.50	346.08	0.3127	31.50	1054.92	0.0305	0.0975376
Z.mays_atp	C.sativa_a	60.00	346.33	0.197	18.00	1054.67	0.0173	0.0878173
Z.mays_atp	G.max_atp1	72.50	346.75	0.2451	20.50	1054.25	0.0197	0.0803754
Z.mays_atp	D.hancocki	37.50	345.25	0.1173	27.50	1055.75	0.0265	0.225916
Z.mays_atp	D.officina	39.50	345.25	0.1241	28.50	1055.75	0.0275	0.221595
Z.mays_atp	D.huoshane	38.50	345.25	0.1207	28.50	1055.75	0.0275	0.227838
G.biloba_a	F.gracilis	70.00	349.75	0.2328	47.00	1051.25	0.0461	0.198024
G.biloba_a	C.sinensis	97.50	349.58	0.3488	54.50	1051.42	0.0537	0.153956
G.biloba_a	C.taitunge	29.00	353.92	0.0868	40.00	1047.08	0.0392	0.451613
G.biloba_a	P.nudum_at	156.42	350.25	0.6787	107.58	1050.75	0.1101	0.162222
G.biloba_a	O.sativa_a	75.50	347.92	0.2562	42.50	1053.08	0.0415	0.161983
G.biloba_a	A.officina	72.00	346.75	0.2431	55.00	1054.25	0.0541	0.222542
G.biloba_a	M.baccata_	76.00	350.5	0.2559	50.00	1050.5	0.0492	0.192263
G.biloba_a	V.vinifera	67.50	350.42	0.2226	41.50	1050.58	0.0406	0.18239
G.biloba_a	C.coggygri	71.50	349.67	0.2388	40.50	1051.33	0.0395	0.16541
G.biloba_a	O.fragrans	77.00	348.75	0.2615	52.00	1052.25	0.0511	0.195411
G.biloba_a	C.quinoa_a	83.50	349.83	0.2873	48.50	1051.17	0.0476	0.16568
G.biloba_a	C.japonica	81.00	349.42	0.2773	58.00	1051.58	0.0573	0.206635
G.biloba_a	B.juncea_a	73.50	348.08	0.248	61.50	1052.92	0.0608	0.245161
G.biloba_a	B.umbellat	127.5	350.33	0.4981	80.50	1050.67	0.0808	0.162216
G.biloba_a	F.hygromet	139.83	347.5	0.5768	90.17	1053.5	0.0909	0.157594
G.biloba_a	C.tinctori	80.00	348.42	0.2741	46.00	1052.58	0.045	0.164174
G.biloba_a	S.miltiorr	96.00	349.08	0.3426	61.00	1051.92	0.0604	0.176299
G.biloba_a	C.sativa_a	67.50	349.33	0.2234	42.50	1051.67	0.0415	0.185765
G.biloba_a	G.max_atp1	81.00	349.75	0.277	47.00	1051.25	0.0461	0.166426
G.biloba_a	D.hancocki	66.00	348.25	0.2185	47.00	1052.75	0.046	0.210526
G.biloba_a	D.officina	68.00	348.25	0.2262	48.00	1052.75	0.047	0.207781
G.biloba_a	D.huoshane	67.00	348.25	0.2223	48.00	1052.75	0.047	0.211426
F.gracilis	C.sinensis	55.50	349	0.1787	29.50	1052	0.0286	0.160045
F.gracilis	C.taitunge	70.00	353.33	0.23	63.00	1047.67	0.0627	0.272609
F.gracilis	P.nudum_at	164.58	349.67	0.7408	106.42	1051.33	0.1087	0.146733
F.gracilis	O.sativa_a	57.50	347.33	0.187	19.50	1053.67	0.0187	0.1
F.gracilis	A.officina	53.00	346.17	0.1712	41.00	1054.83	0.0399	0.233061
F.gracilis	M.baccata_	25.00	349.92	0.0751	9.00	1051.08	0.0086	0.114514
F.gracilis	V.vinifera	20.50	349.83	0.061	16.50	1051.17	0.0159	0.260656
F.gracilis	C.coggygri	26.00	349.08	0.0784	12.00	1051.92	0.0115	0.146684
F.gracilis	O.fragrans	34.00	348.17	0.1046	21.00	1052.83	0.0202	0.193117
F.gracilis	C.quinoa_a	42.00	349.25	0.1311	18.00	1051.75	0.0173	0.13196
F.gracilis	C.japonica	32.00	348.83	0.0978	28.00	1052.17	0.0271	0.277096
F.gracilis	B.juncea_a	31.00	347.5	0.095	32.00	1053.5	0.031	0.326316
F.gracilis	B.umbellat	112	349.75	0.4176	54.00	1051.25	0.0532	0.127395
F.gracilis	F.hygromet	145.33	346.92	0.6133	87.67	1054.08	0.0882	0.143812
F.gracilis	C.tinctori	33.50	347.83	0.1031	14.50	1053.17	0.0139	0.134821
F.gracilis	S.miltiorr	54.50	348.5	0.1754	33.50	1052.5	0.0325	0.185291
F.gracilis	C.sativa_a	24.00	348.75	0.0722	16.00	1052.25	0.0154	0.213296
F.gracilis	G.max_atp1	36.50	349.17	0.1126	17.50	1051.83	0.0168	0.149201
F.gracilis	D.hancocki	51.00	347.67	0.1632	26.00	1053.33	0.0251	0.153799
F.gracilis	D.officina	51.00	347.67	0.1632	27.00	1053.33	0.0261	0.159926
F.gracilis	D.huoshane	52.00	347.67	0.1668	27.00	1053.33	0.0261	0.156475
C.sinensis	C.taitunge	98.00	353.17	0.3465	71.00	1047.83	0.071	0.204906
C.sinensis	P.nudum_at	185.92	349.5	0.9265	102.08	1051.5	0.104	0.11225
C.sinensis	O.sativa_a	80.00	347.17	0.2753	25.00	1053.83	0.0241	0.0875409
C.sinensis	A.officina	80.00	346	0.2764	50.00	1055	0.049	0.177279
C.sinensis	M.baccata_	61.50	349.75	0.2004	32.50	1051.25	0.0316	0.157685
C.sinensis	V.vinifera	52.50	349.67	0.1675	29.50	1051.33	0.0286	0.170746
C.sinensis	C.coggygri	44.50	348.92	0.1398	23.50	1052.08	0.0227	0.162375
C.sinensis	O.fragrans	61.50	348	0.2015	30.50	1053	0.0295	0.146402
C.sinensis	C.quinoa_a	69.17	349.08	0.2301	23.83	1051.92	0.023	0.0999565
C.sinensis	C.japonica	65.00	348.67	0.2143	29.00	1052.33	0.0281	0.131125
C.sinensis	B.juncea_a	62.50	347.33	0.2058	38.50	1053.67	0.0375	0.182216
C.sinensis	B.umbellat	136	349.58	0.5485	64.00	1051.42	0.0635	0.11577
C.sinensis	F.hygromet	159.58	346.75	0.7132	86.42	1054.25	0.0868	0.121705
C.sinensis	C.tinctori	59.50	347.67	0.1943	25.50	1053.33	0.0246	0.126608
C.sinensis	S.miltiorr	76.50	348.33	0.2599	30.50	1052.67	0.0295	0.113505
C.sinensis	C.sativa_a	52.50	348.58	0.1681	17.50	1052.42	0.0168	0.0999405
C.sinensis	G.max_atp1	65.00	349	0.2141	21.00	1052	0.0202	0.0943484
C.sinensis	D.hancocki	75.50	347.5	0.2565	38.50	1053.5	0.0375	0.146199
C.sinensis	D.officina	76.50	347.5	0.2606	39.50	1053.5	0.0385	0.147736
C.sinensis	D.huoshane	75.50	347.5	0.2565	39.50	1053.5	0.0385	0.150097
C.taitunge	P.nudum_at	156.75	353.83	0.6699	123.25	1047.17	0.128	0.191073
C.taitunge	O.sativa_a	75.00	351.5	0.2511	60.00	1049.5	0.0595	0.236957
C.taitunge	A.officina	72.50	350.33	0.2421	67.50	1050.67	0.0672	0.277571
C.taitunge	M.baccata_	77.50	354.08	0.2588	65.50	1046.92	0.0653	0.252318
C.taitunge	V.vinifera	66.50	354	0.2162	55.50	1047	0.055	0.254394
C.taitunge	C.coggygri	70.00	353.25	0.2301	56.00	1047.75	0.0554	0.240765
C.taitunge	O.fragrans	74.00	352.33	0.2464	68.00	1048.67	0.0678	0.275162
C.taitunge	C.quinoa_a	83.00	353.42	0.2817	66.00	1047.58	0.0658	0.233582
C.taitunge	C.japonica	78.50	353	0.2638	73.50	1048	0.0736	0.278999
C.taitunge	B.juncea_a	77.00	351.67	0.2589	79.00	1049.33	0.0793	0.306296
C.taitunge	B.umbellat	122.5	353.92	0.4642	94.50	1047.08	0.0962	0.207238
C.taitunge	F.hygromet	134.83	351.08	0.5382	106.17	1049.92	0.1086	0.201784
C.taitunge	C.tinctori	79.00	352	0.2667	60.00	1049	0.0595	0.223097
C.taitunge	S.miltiorr	94.50	352.67	0.3315	77.50	1048.33	0.0778	0.234691
C.taitunge	C.sativa_a	66.00	352.92	0.2151	60.00	1048.08	0.0596	0.27708
C.taitunge	G.max_atp1	81.50	353.33	0.2756	62.50	1047.67	0.0622	0.225689
C.taitunge	D.hancocki	65.50	351.83	0.214	60.50	1049.17	0.06	0.280374
C.taitunge	D.officina	67.50	351.83	0.2216	61.50	1049.17	0.061	0.275271
C.taitunge	D.huoshane	66.50	351.83	0.2178	61.50	1049.17	0.061	0.280073
P.nudum_at	O.sativa_a	164.58	347.83	0.7475	99.42	1053.17	0.1009	0.134983
P.nudum_at	A.officina	167.92	346.67	0.7785	117.08	1054.33	0.1202	0.154399
P.nudum_at	M.baccata_	169.08	350.42	0.7733	108.92	1050.58	0.1116	0.144317
P.nudum_at	V.vinifera	164.42	350.33	0.7371	106.58	1050.67	0.109	0.147877
P.nudum_at	C.coggygri	165.92	349.58	0.7514	103.08	1051.42	0.1051	0.139872
P.nudum_at	O.fragrans	162.08	348.67	0.7253	107.92	1052.33	0.1103	0.152075
P.nudum_at	C.quinoa_a	162.08	349.75	0.7216	100.92	1051.25	0.1027	0.142323
P.nudum_at	C.japonica	160.58	349.33	0.7118	103.42	1051.67	0.1054	0.148075
P.nudum_at	B.juncea_a	168.58	348	0.7787	118.42	1053	0.1218	0.156415
P.nudum_at	B.umbellat	188.83	350.25	0.9517	132.17	1050.75	0.1377	0.144688
P.nudum_at	F.hygromet	147.25	347.42	0.6245	75.75	1053.58	0.0756	0.121057
P.nudum_at	C.tinctori	170.58	348.33	0.7937	105.42	1052.67	0.1075	0.135442
P.nudum_at	S.miltiorr	160.67	349	0.7136	100.33	1052	0.102	0.142937
P.nudum_at	C.sativa_a	162.42	349.25	0.7258	99.58	1051.75	0.1012	0.139432
P.nudum_at	G.max_atp1	168.25	349.67	0.7695	95.75	1051.33	0.0971	0.126186
P.nudum_at	D.hancocki	161.92	348.17	0.7258	113.08	1052.83	0.1159	0.159686
P.nudum_at	D.officina	160.42	348.17	0.7146	112.58	1052.83	0.1154	0.161489
P.nudum_at	D.huoshane	161.42	348.17	0.7221	112.58	1052.83	0.1154	0.159812
O.sativa_a	A.officina	28.00	344.33	0.0861	33.00	1056.67	0.0319	0.370499
O.sativa_a	M.baccata_	64.00	348.08	0.2109	24.00	1052.92	0.0231	0.109531
O.sativa_a	V.vinifera	46.50	348	0.1472	21.50	1053	0.0207	0.140625
O.sativa_a	C.coggygri	55.00	347.25	0.1779	15.00	1053.75	0.0144	0.0809444
O.sativa_a	O.fragrans	61.00	346.33	0.2008	21.00	1054.67	0.0202	0.100598
O.sativa_a	C.quinoa_a	68.50	347.42	0.2288	23.50	1053.58	0.0226	0.0987762
O.sativa_a	C.japonica	57.00	347	0.1854	23.00	1054	0.0221	0.119202
O.sativa_a	B.juncea_a	59.50	345.67	0.1955	33.50	1055.33	0.0324	0.165729
O.sativa_a	B.umbellat	102	347.92	0.3718	51.00	1053.08	0.0501	0.13475
O.sativa_a	F.hygromet	140.83	345.08	0.5892	78.17	1055.92	0.0779	0.132213
O.sativa_a	C.tinctori	62.50	346	0.2067	19.50	1055	0.0187	0.0904693
O.sativa_a	S.miltiorr	79.50	346.67	0.2737	30.50	1054.33	0.0295	0.107782
O.sativa_a	C.sativa_a	53.00	346.92	0.1708	13.00	1054.08	0.0124	0.0725995
O.sativa_a	G.max_atp1	64.50	347.33	0.2134	15.50	1053.67	0.0149	0.0698219
O.sativa_a	D.hancocki	26.00	345.83	0.0792	23.00	1055.17	0.0221	0.27904
O.sativa_a	D.officina	28.00	345.83	0.0857	24.00	1055.17	0.0231	0.269545
O.sativa_a	D.huoshane	27.00	345.83	0.0824	24.00	1055.17	0.0231	0.28034
A.officina	M.baccata_	53.50	346.92	0.1726	44.50	1054.08	0.0435	0.252028
A.officina	V.vinifera	42.50	346.83	0.1338	40.50	1054.17	0.0394	0.294469
A.officina	C.coggygri	50.00	346.08	0.1605	36.00	1054.92	0.0349	0.217445
A.officina	O.fragrans	55.00	345.17	0.1791	42.00	1055.83	0.0409	0.228364
A.officina	C.quinoa_a	64.00	346.25	0.2122	46.00	1054.75	0.0449	0.211593
A.officina	C.japonica	52.00	345.83	0.1678	52.00	1055.17	0.051	0.303933
A.officina	B.juncea_a	52.50	344.5	0.1704	56.50	1056.5	0.0555	0.325704
A.officina	B.umbellat	99.33	346.75	0.3609	70.67	1054.25	0.0702	0.194514
A.officina	F.hygromet	142.25	343.92	0.6014	99.75	1057.08	0.1008	0.167609
A.officina	C.tinctori	57.50	344.83	0.1886	40.50	1056.17	0.0394	0.208908
A.officina	S.miltiorr	73.50	345.5	0.2502	56.50	1055.5	0.0555	0.221823
A.officina	C.sativa_a	46.00	345.75	0.1465	40.00	1055.25	0.0389	0.265529
A.officina	G.max_atp1	59.50	346.17	0.1952	42.50	1054.83	0.0414	0.21209
A.officina	D.hancocki	21.00	344.67	0.0635	29.00	1056.33	0.028	0.440945
A.officina	D.officina	23.00	344.67	0.0699	30.00	1056.33	0.029	0.414878
A.officina	D.huoshane	22.00	344.67	0.0667	30.00	1056.33	0.029	0.434783
M.baccata_	V.vinifera	26.50	350.58	0.0797	17.50	1050.42	0.0168	0.21079
M.baccata_	C.coggygri	32.00	349.83	0.0975	13.00	1051.17	0.0125	0.128205
M.baccata_	O.fragrans	39.00	348.92	0.121	20.00	1052.08	0.0193	0.159504
M.baccata_	C.quinoa_a	52.50	350	0.1674	19.50	1051	0.0188	0.112306
M.baccata_	C.japonica	40.50	349.58	0.1258	30.50	1051.42	0.0296	0.235294
M.baccata_	B.juncea_a	37.00	348.25	0.1146	33.00	1052.75	0.032	0.279232
M.baccata_	B.umbellat	116	350.5	0.4366	61.00	1050.5	0.0604	0.138342
M.baccata_	F.hygromet	150.67	347.67	0.6467	92.33	1053.33	0.0932	0.144116
M.baccata_	C.tinctori	42.50	348.58	0.1331	13.50	1052.42	0.0129	0.0969196
M.baccata_	S.miltiorr	64.50	349.25	0.212	34.50	1051.75	0.0335	0.158019
M.baccata_	C.sativa_a	26.00	349.5	0.0783	17.00	1051.5	0.0163	0.208174
M.baccata_	G.max_atp1	41.00	349.92	0.1274	21.00	1051.08	0.0203	0.159341
M.baccata_	D.hancocki	57.00	348.42	0.1845	29.00	1052.58	0.0281	0.152304
M.baccata_	D.officina	57.00	348.42	0.1845	28.00	1052.58	0.0271	0.146883
M.baccata_	D.huoshane	58.00	348.42	0.1882	28.00	1052.58	0.0271	0.143996
V.vinifera	C.coggygri	19.50	349.75	0.0579	10.50	1051.25	0.0101	0.174439
V.vinifera	O.fragrans	28.50	348.83	0.0865	19.50	1052.17	0.0188	0.217341
V.vinifera	C.quinoa_a	40.50	349.92	0.1257	20.50	1051.08	0.0198	0.157518
V.vinifera	C.japonica	30.00	349.5	0.0912	29.00	1051.5	0.0281	0.308114
V.vinifera	B.juncea_a	28.50	348.17	0.0867	34.50	1052.83	0.0335	0.38639
V.vinifera	B.umbellat	104.5	350.42	0.3802	59.50	1050.58	0.0589	0.154918
V.vinifera	F.hygromet	139.17	347.58	0.5724	90.83	1053.42	0.0916	0.160028
V.vinifera	C.tinctori	28.00	348.5	0.085	15.00	1052.5	0.0144	0.169412
V.vinifera	S.miltiorr	52.50	349.17	0.1678	35.50	1051.83	0.0345	0.205602
V.vinifera	C.sativa_a	16.00	349.42	0.0472	16.00	1051.58	0.0154	0.326271
V.vinifera	G.max_atp1	34.50	349.83	0.1057	20.50	1051.17	0.0198	0.187323
V.vinifera	D.hancocki	43.00	348.33	0.1349	26.00	1052.67	0.0251	0.186064
V.vinifera	D.officina	45.00	348.33	0.1418	27.00	1052.67	0.0261	0.184062
V.vinifera	D.huoshane	44.00	348.33	0.1383	27.00	1052.67	0.0261	0.18872
C.coggygri	O.fragrans	32.00	348.08	0.0981	19.00	1052.92	0.0183	0.186544
C.coggygri	C.quinoa_a	39.00	349.17	0.1209	17.00	1051.83	0.0163	0.134822
C.coggygri	C.japonica	33.00	348.75	0.1011	27.00	1052.25	0.0261	0.25816
C.coggygri	B.juncea_a	29.50	347.42	0.0901	28.50	1053.58	0.0276	0.306326
C.coggygri	B.umbellat	113.25	349.67	0.424	57.75	1051.33	0.057	0.134434
C.coggygri	F.hygromet	144.42	346.83	0.6076	86.58	1054.17	0.087	0.143186
C.coggygri	C.tinctori	31.50	347.75	0.0965	10.50	1053.25	0.01	0.103627
C.coggygri	S.miltiorr	55.00	348.42	0.1772	31.00	1052.58	0.03	0.1693
C.coggygri	C.sativa_a	22.00	348.67	0.0659	10.00	1052.33	0.0096	0.145675
C.coggygri	G.max_atp1	38.50	349.08	0.1193	14.50	1051.92	0.0139	0.116513
C.coggygri	D.hancocki	47.00	347.58	0.1491	22.00	1053.42	0.0212	0.142186
C.coggygri	D.officina	47.00	347.58	0.1491	23.00	1053.42	0.0222	0.148893
C.coggygri	D.huoshane	46.00	347.58	0.1456	23.00	1053.42	0.0222	0.152473
O.fragrans	C.quinoa_a	50.50	348.25	0.1611	21.50	1052.75	0.0207	0.128492
O.fragrans	C.japonica	28.00	347.83	0.0852	22.00	1053.17	0.0212	0.248826
O.fragrans	B.juncea_a	29.50	346.5	0.0904	35.50	1054.5	0.0344	0.380531
O.fragrans	B.umbellat	114	348.75	0.4293	57.00	1052.25	0.0562	0.130911
O.fragrans	F.hygromet	139.17	345.92	0.5766	91.83	1055.08	0.0925	0.160423
O.fragrans	C.tinctori	32.50	346.83	0.1001	17.50	1054.17	0.0168	0.167832
O.fragrans	S.miltiorr	33.00	347.5	0.1015	25.00	1053.5	0.0241	0.237438
O.fragrans	C.sativa_a	25.00	347.75	0.0756	19.00	1053.25	0.0183	0.242063
O.fragrans	G.max_atp1	40.50	348.17	0.1264	21.50	1052.83	0.0207	0.163766
O.fragrans	D.hancocki	52.50	346.67	0.1692	32.50	1054.33	0.0315	0.18617
O.fragrans	D.officina	54.50	346.67	0.1764	33.50	1054.33	0.0325	0.18424
O.fragrans	D.huoshane	53.50	346.67	0.1728	33.50	1054.33	0.0325	0.188079
C.quinoa_a	C.japonica	48.50	348.92	0.1537	20.50	1052.08	0.0197	0.128172
C.quinoa_a	B.juncea_a	49.00	347.58	0.1562	33.00	1053.42	0.032	0.204866
C.quinoa_a	B.umbellat	125.5	349.83	0.488	60.50	1051.17	0.0599	0.122746
C.quinoa_a	F.hygromet	150.83	347	0.6499	86.17	1054	0.0866	0.133251
C.quinoa_a	C.tinctori	53.00	347.92	0.1703	21.00	1053.08	0.0202	0.118614
C.quinoa_a	S.miltiorr	70.00	348.58	0.2337	22.00	1052.42	0.0212	0.0907146
C.quinoa_a	C.sativa_a	42.00	348.83	0.1312	12.00	1052.17	0.0115	0.0876524
C.quinoa_a	G.max_atp1	54.00	349.25	0.1732	15.00	1051.75	0.0144	0.0831409
C.quinoa_a	D.hancocki	62.50	347.75	0.2055	33.50	1053.25	0.0325	0.158151
C.quinoa_a	D.officina	64.00	347.75	0.2112	35.00	1053.25	0.034	0.160985
C.quinoa_a	D.huoshane	63.00	347.75	0.2074	35.00	1053.25	0.034	0.163934
C.japonica	B.juncea_a	31.50	347.17	0.0967	38.50	1053.83	0.0375	0.387797
C.japonica	B.umbellat	112	349.42	0.4181	56.00	1051.58	0.0552	0.132026
C.japonica	F.hygromet	143	346.58	0.5991	83.00	1054.42	0.0832	0.138875
C.japonica	C.tinctori	35.50	347.5	0.1098	25.50	1053.5	0.0246	0.224044
C.japonica	S.miltiorr	47.50	348.17	0.1506	14.50	1052.83	0.0139	0.0922975
C.japonica	C.sativa_a	28.00	348.42	0.085	19.00	1052.58	0.0183	0.215294
C.japonica	G.max_atp1	40.08	348.83	0.1247	18.92	1052.17	0.0182	0.14595
C.japonica	D.hancocki	52.50	347.33	0.1688	39.50	1053.67	0.0385	0.228081
C.japonica	D.officina	54.50	347.33	0.176	40.50	1053.67	0.0395	0.224432
C.japonica	D.huoshane	53.50	347.33	0.1724	40.50	1053.67	0.0395	0.229118
B.juncea_a	B.umbellat	110	348.08	0.4103	72.00	1052.92	0.0717	0.17475
B.juncea_a	F.hygromet	146.67	345.25	0.6268	100.33	1055.75	0.1016	0.162093
B.juncea_a	C.tinctori	35.50	346.17	0.1103	31.50	1054.83	0.0305	0.276519
B.juncea_a	S.miltiorr	52.00	346.83	0.1673	42.00	1054.17	0.0409	0.244471
B.juncea_a	C.sativa_a	28.50	347.08	0.087	26.50	1053.92	0.0256	0.294253
B.juncea_a	G.max_atp1	38.00	347.5	0.1182	34.00	1053.5	0.033	0.279188
B.juncea_a	D.hancocki	50.00	346	0.1605	41.00	1055	0.0399	0.248598
B.juncea_a	D.officina	50.00	346	0.1605	42.00	1055	0.0409	0.254829
B.juncea_a	D.huoshane	51.00	346	0.1641	42.00	1055	0.0409	0.249238
B.umbellat	F.hygromet	174.42	347.5	0.8297	110.58	1053.5	0.1131	0.136314
B.umbellat	C.tinctori	112.5	348.42	0.4223	60.50	1052.58	0.0598	0.141605
B.umbellat	S.miltiorr	124.5	349.08	0.484	66.50	1051.92	0.066	0.136364
B.umbellat	C.sativa_a	114	349.33	0.4283	58.00	1051.67	0.0573	0.133785
B.umbellat	G.max_atp1	122.33	349.75	0.471	55.67	1051.25	0.0549	0.116561
B.umbellat	D.hancocki	102	348.25	0.3714	59.00	1052.75	0.0582	0.156704
B.umbellat	D.officina	101.75	348.25	0.3702	60.25	1052.75	0.0595	0.160724
B.umbellat	D.huoshane	102.75	348.25	0.3749	60.25	1052.75	0.0595	0.158709
F.hygromet	C.tinctori	141.67	345.58	0.5932	88.33	1055.42	0.0887	0.149528
F.hygromet	S.miltiorr	135.58	346.25	0.5538	84.42	1054.75	0.0846	0.152763
F.hygromet	C.sativa_a	141.67	346.5	0.5908	82.33	1054.5	0.0824	0.139472
F.hygromet	G.max_atp1	143.83	346.92	0.6036	80.17	1054.08	0.0802	0.132869
F.hygromet	D.hancocki	138.25	345.42	0.5721	95.75	1055.58	0.0967	0.169026
F.hygromet	D.officina	140	345.42	0.5831	96.00	1055.58	0.0969	0.166181
F.hygromet	D.huoshane	139	345.42	0.5768	96.00	1055.58	0.0969	0.167996
C.tinctori	S.miltiorr	52.00	347.17	0.1671	32.00	1053.83	0.031	0.185518
C.tinctori	C.sativa_a	29.00	347.42	0.0885	14.00	1053.58	0.0134	0.151412
C.tinctori	G.max_atp1	44.50	347.83	0.1403	16.50	1053.17	0.0158	0.112616
C.tinctori	D.hancocki	57.00	346.33	0.1858	27.00	1054.67	0.026	0.139935
C.tinctori	D.officina	59.00	346.33	0.1932	28.00	1054.67	0.027	0.139752
C.tinctori	D.huoshane	58.00	346.33	0.1895	28.00	1054.67	0.027	0.14248
S.miltiorr	C.sativa_a	48.00	348.08	0.1524	23.00	1052.92	0.0222	0.145669
S.miltiorr	G.max_atp1	55.50	348.5	0.179	21.50	1052.5	0.0207	0.115642
S.miltiorr	D.hancocki	74.00	347	0.2509	46.00	1054	0.045	0.179354
S.miltiorr	D.officina	76.00	347	0.259	47.00	1054	0.046	0.177606
S.miltiorr	D.huoshane	75.00	347	0.255	47.00	1054	0.046	0.180392
C.sativa_a	G.max_atp1	34.50	348.75	0.1061	10.50	1052.25	0.01	0.0942507
C.sativa_a	D.hancocki	45.00	347.25	0.1423	26.00	1053.75	0.0251	0.176388
C.sativa_a	D.officina	47.00	347.25	0.1493	27.00	1053.75	0.0261	0.174816
C.sativa_a	D.huoshane	46.00	347.25	0.1458	27.00	1053.75	0.0261	0.179012
G.max_atp1	D.hancocki	58.50	347.67	0.1905	30.50	1053.33	0.0295	0.154856
G.max_atp1	D.officina	60.50	347.67	0.198	31.50	1053.33	0.0305	0.15404
G.max_atp1	D.huoshane	59.50	347.67	0.1943	31.50	1053.33	0.0305	0.156974
D.hancocki	D.officina	2.00	346.17	0.0058	1.00	1054.83	0.0009	0.155172
D.hancocki	D.huoshane	1.00	346.17	0.0029	1.00	1054.83	0.0009	0.310345
D.officina	D.huoshane	1.00	346.17	0.0029	0.00	1054.83	0	0

## Sheet: atp6
Seq 1	Seq 2	SynDif	SynPos	Ks	NSynDif	NSynPos	Ka	KA/KS
G.elata_at	A.thaliana	33.00	159.92	0.2413	55.00	518.08	0.1145	0.474513
G.elata_at	Z.mays_atp	23.50	164.25	0.1588	38.50	513.75	0.079	0.497481
G.elata_at	G.biloba_a	51.67	165.83	0.4026	65.33	512.17	0.1398	0.347243
G.elata_at	F.gracilis	35.00	163.08	0.2528	29.00	514.92	0.0585	0.231408
G.elata_at	C.sinensis	34.00	159.75	0.2503	51.00	518.25	0.1055	0.421494
G.elata_at	C.taitunge	46.83	167.33	0.3503	63.17	510.67	0.1352	0.385955
G.elata_at	P.nudum_at	90.33	164.58	0.9871	73.67	513.42	0.1593	0.161382
G.elata_at	O.sativa_a	26.67	162	0.1858	46.33	516	0.0956	0.514532
G.elata_at	A.officina	20.50	162.17	0.1384	22.50	515.83	0.0449	0.324422
G.elata_at	M.baccata_	28.00	162.25	0.1961	35.00	515.75	0.0711	0.36257
G.elata_at	V.vinifera	29.00	161.25	0.2056	31.00	516.75	0.0625	0.303988
G.elata_at	C.coggygri	32.00	160.67	0.2315	55.00	517.33	0.1146	0.495032
G.elata_at	O.fragrans	30.00	161.92	0.2128	32.00	516.08	0.0647	0.304041
G.elata_at	C.quinoa_a	31.00	161	0.2225	39.00	517	0.0795	0.357303
G.elata_at	C.japonica	28.00	161.92	0.1966	33.00	516.08	0.0668	0.339776
G.elata_at	B.juncea_a	32.50	159.75	0.2373	58.50	518.25	0.1223	0.515381
G.elata_at	B.umbellat	28.00	162.17	0.1962	35.00	515.83	0.0711	0.362385
G.elata_at	F.hygromet	74.67	160.5	0.7262	71.33	517.5	0.1523	0.209722
G.elata_at	C.tinctori	29.50	160.25	0.2112	53.50	517.75	0.1112	0.526515
G.elata_at	S.miltiorr	40.50	161.83	0.3045	59.50	516.17	0.1252	0.411166
G.elata_at	C.sativa_a	31.50	160.75	0.2271	50.50	517.25	0.1046	0.46059
G.elata_at	G.max_atp6	32.50	161.08	0.235	34.50	516.92	0.0699	0.297447
G.elata_at	D.hancocki	12.50	162.33	0.0812	12.50	515.67	0.0246	0.302956
G.elata_at	D.officina	10.50	162.33	0.0676	12.50	515.67	0.0246	0.363905
G.elata_at	D.huoshane	139.92	172.5	n.a.	214.08	505.5	0.6238	#VALUE!
A.thaliana	Z.mays_atp	30.00	160.33	0.2152	44.00	517.67	0.0902	0.419145
A.thaliana	G.biloba_a	34.33	161.92	0.2492	74.67	516.08	0.1607	0.644864
A.thaliana	F.gracilis	17.00	159.17	0.1152	41.00	518.83	0.0835	0.724826
A.thaliana	C.sinensis	13.00	155.83	0.0884	17.00	522.17	0.0333	0.376697
A.thaliana	C.taitunge	28.50	163.42	0.1985	68.50	514.58	0.1465	0.738035
A.thaliana	P.nudum_at	81.33	160.67	0.8429	73.67	517.33	0.1579	0.187329
A.thaliana	O.sativa_a	29.50	158.08	0.2146	47.50	519.92	0.0974	0.453868
A.thaliana	A.officina	25.00	158.25	0.1774	45.00	519.75	0.092	0.518602
A.thaliana	M.baccata_	10.00	158.33	0.066	37.00	519.67	0.0748	1.13333
A.thaliana	V.vinifera	10.50	157.33	0.0699	40.50	520.67	0.0821	1.17454
A.thaliana	C.coggygri	8.00	156.75	0.0529	19.00	521.25	0.0374	0.706994
A.thaliana	O.fragrans	13.00	158	0.0872	37.00	520	0.0748	0.857798
A.thaliana	C.quinoa_a	14.00	157.08	0.0949	26.00	520.92	0.0517	0.544784
A.thaliana	C.japonica	12.00	158	0.0801	35.00	520	0.0705	0.88015
A.thaliana	B.juncea_a	1.00	155.83	0.0064	3.00	522.17	0.0058	0.90625
A.thaliana	B.umbellat	21.50	158.25	0.1499	44.50	519.75	0.0909	0.606404
A.thaliana	F.hygromet	71.17	156.58	0.6985	45.83	521.42	0.0935	0.133858
A.thaliana	C.tinctori	9.00	156.33	0.0599	14.00	521.67	0.0273	0.45576
A.thaliana	S.miltiorr	27.75	157.92	0.2002	47.25	520.08	0.0968	0.483516
A.thaliana	C.sativa_a	8.00	156.83	0.0528	16.00	521.17	0.0313	0.592803
A.thaliana	G.max_atp6	18.00	157.17	0.1243	35.00	520.83	0.0704	0.566372
A.thaliana	D.hancocki	26.50	158.42	0.1893	45.50	519.58	0.0931	0.491812
A.thaliana	D.officina	25.00	158.42	0.1772	45.00	519.58	0.092	0.519187
A.thaliana	D.huoshane	131.92	168.58	n.a.	193.08	509.42	0.528	#VALUE!
Z.mays_atp	G.biloba_a	52.33	166.25	0.4082	64.67	511.75	0.1384	0.339049
Z.mays_atp	F.gracilis	26.50	163.5	0.1826	33.50	514.5	0.0681	0.372946
Z.mays_atp	C.sinensis	29.50	160.17	0.2114	40.50	517.83	0.0826	0.390728
Z.mays_atp	C.taitunge	45.50	167.75	0.3367	58.50	510.25	0.1244	0.369468
Z.mays_atp	P.nudum_at	93.83	165	1.0649	74.17	513	0.1606	0.150812
Z.mays_atp	O.sativa_a	13.25	162.42	0.0864	26.75	515.58	0.0538	0.622685
Z.mays_atp	A.officina	15.00	162.58	0.0984	24.00	515.42	0.0481	0.488821
Z.mays_atp	M.baccata_	27.00	162.67	0.1876	35.00	515.33	0.0712	0.379531
Z.mays_atp	V.vinifera	25.00	161.67	0.1732	35.00	516.33	0.071	0.409931
Z.mays_atp	C.coggygri	30.50	161.08	0.2182	41.50	516.92	0.0849	0.389093
Z.mays_atp	O.fragrans	27.00	162.33	0.188	31.00	515.67	0.0627	0.333511
Z.mays_atp	C.quinoa_a	26.00	161.42	0.1813	37.00	516.58	0.0753	0.415334
Z.mays_atp	C.japonica	25.00	162.33	0.1724	28.00	515.67	0.0564	0.327146
Z.mays_atp	B.juncea_a	30.00	160.17	0.2155	45.00	517.83	0.0924	0.42877
Z.mays_atp	B.umbellat	18.50	162.58	0.1234	34.50	515.42	0.0701	0.568071
Z.mays_atp	F.hygromet	74.00	160.92	0.7123	68.00	517.08	0.1446	0.203004
Z.mays_atp	C.tinctori	27.50	160.67	0.1943	42.50	517.33	0.087	0.447761
Z.mays_atp	S.miltiorr	41.00	162.25	0.3082	59.00	515.75	0.1241	0.402661
Z.mays_atp	C.sativa_a	29.50	161.17	0.2098	37.50	516.83	0.0763	0.36368
Z.mays_atp	G.max_atp6	30.00	161.5	0.2134	35.00	516.5	0.071	0.332709
Z.mays_atp	D.hancocki	16.00	162.75	0.1054	30.00	515.25	0.0606	0.574953
Z.mays_atp	D.officina	14.50	162.75	0.0948	29.50	515.25	0.0596	0.628692
Z.mays_atp	D.huoshane	135.58	172.92	n.a.	206.42	505.08	0.5904	#VALUE!
G.biloba_a	F.gracilis	40.83	165.08	0.3001	51.17	512.92	0.107	0.356548
G.biloba_a	C.sinensis	38.83	161.75	0.2894	67.17	516.25	0.1429	0.49378
G.biloba_a	C.taitunge	16.00	169.33	0.101	24.00	508.67	0.0487	0.482178
G.biloba_a	P.nudum_at	76.17	166.58	0.7055	77.83	511.42	0.1701	0.241106
G.biloba_a	O.sativa_a	48.33	164	0.3744	70.67	514	0.1519	0.405716
G.biloba_a	A.officina	46.33	164.17	0.3541	54.67	513.83	0.1147	0.32392
G.biloba_a	M.baccata_	34.83	164.25	0.2493	48.17	513.75	0.1002	0.401925
G.biloba_a	V.vinifera	33.33	163.25	0.2383	45.67	514.75	0.0944	0.396139
G.biloba_a	C.coggygri	35.33	162.67	0.2565	68.67	515.33	0.1467	0.57193
G.biloba_a	O.fragrans	34.33	163.92	0.2456	47.67	514.08	0.099	0.403094
G.biloba_a	C.quinoa_a	33.83	163	0.243	58.17	515	0.1224	0.503704
G.biloba_a	C.japonica	33.33	163.92	0.2372	53.67	514.08	0.1124	0.473862
G.biloba_a	B.juncea_a	35.33	161.75	0.2582	75.67	516.25	0.1631	0.631681
G.biloba_a	B.umbellat	43.83	164.17	0.3301	57.17	513.83	0.1204	0.364738
G.biloba_a	F.hygromet	73.17	162.5	0.6879	87.83	515.5	0.1933	0.281
G.biloba_a	C.tinctori	34.33	162.25	0.2486	66.67	515.75	0.1419	0.570796
G.biloba_a	S.miltiorr	46.08	163.83	0.3526	88.92	514.17	0.1966	0.557572
G.biloba_a	C.sativa_a	35.83	162.75	0.2606	66.17	515.25	0.1409	0.540675
G.biloba_a	G.max_atp6	41.33	163.08	0.3093	53.67	514.92	0.1122	0.362755
G.biloba_a	D.hancocki	48.67	164.33	0.3767	56.33	513.67	0.1186	0.314839
G.biloba_a	D.officina	46.83	164.33	0.3585	56.17	513.67	0.1182	0.329707
G.biloba_a	D.huoshane	130	174.5	3.7558	231	503.5	0.7095	0.188908
F.gracilis	C.sinensis	20.50	159	0.1415	34.50	519	0.0696	0.491873
F.gracilis	C.taitunge	33.50	166.58	0.2341	48.50	511.42	0.1014	0.433148
F.gracilis	P.nudum_at	92.83	163.83	1.0564	67.17	514.17	0.1435	0.135839
F.gracilis	O.sativa_a	26.17	161.25	0.1829	39.83	516.75	0.0813	0.444505
F.gracilis	A.officina	26.00	161.42	0.1813	25.00	516.58	0.05	0.275786
F.gracilis	M.baccata_	11.00	161.5	0.0714	7.00	516.5	0.0137	0.191877
F.gracilis	V.vinifera	13.00	160.5	0.0857	13.00	517.5	0.0256	0.298716
F.gracilis	C.coggygri	15.50	159.92	0.1038	34.50	518.08	0.0697	0.671484
F.gracilis	O.fragrans	16.00	161.17	0.1065	17.00	516.83	0.0336	0.315493
F.gracilis	C.quinoa_a	17.00	160.25	0.1144	19.00	517.75	0.0376	0.328671
F.gracilis	C.japonica	14.00	161.17	0.0923	18.00	516.83	0.0357	0.386782
F.gracilis	B.juncea_a	16.00	159	0.1081	42.00	519	0.0856	0.791859
F.gracilis	B.umbellat	22.50	161.42	0.1542	23.50	516.58	0.0469	0.30415
F.gracilis	F.hygromet	72.50	159.75	0.6969	64.50	518.25	0.1361	0.195293
F.gracilis	C.tinctori	14.00	159.5	0.0934	32.00	518.5	0.0644	0.689507
F.gracilis	S.miltiorr	28.25	161.08	0.1998	50.75	516.92	0.1052	0.526527
F.gracilis	C.sativa_a	14.00	160	0.093	30.00	518	0.0603	0.648387
F.gracilis	G.max_atp6	18.00	160.33	0.1216	18.00	517.67	0.0356	0.292763
F.gracilis	D.hancocki	26.50	161.58	0.1851	21.50	516.42	0.0428	0.231226
F.gracilis	D.officina	26.50	161.58	0.1851	21.50	516.42	0.0428	0.231226
F.gracilis	D.huoshane	132.83	171.75	n.a.	209.17	506.25	0.6004	#VALUE!
C.sinensis	C.taitunge	33.00	163.25	0.2355	62.00	514.75	0.1313	0.557537
C.sinensis	P.nudum_at	85.17	160.5	0.922	67.83	517.5	0.1441	0.156291
C.sinensis	O.sativa_a	27.50	157.92	0.1982	45.50	520.08	0.093	0.469223
C.sinensis	A.officina	26.50	158.08	0.1897	40.50	519.92	0.0822	0.433316
C.sinensis	M.baccata_	12.50	158.17	0.0835	29.50	519.83	0.059	0.706587
C.sinensis	V.vinifera	11.00	157.17	0.0735	31.00	520.83	0.062	0.843537
C.sinensis	C.coggygri	12.00	156.58	0.0808	10.00	521.42	0.0194	0.240099
C.sinensis	O.fragrans	13.00	157.83	0.0872	28.00	520.17	0.0559	0.641055
C.sinensis	C.quinoa_a	11.50	156.92	0.0771	17.50	521.08	0.0344	0.446174
C.sinensis	C.japonica	10.00	157.83	0.0662	31.00	520.17	0.0621	0.938066
C.sinensis	B.juncea_a	13.00	155.67	0.0885	18.00	522.33	0.0353	0.39887
C.sinensis	B.umbellat	26.50	158.08	0.1897	36.50	519.92	0.0737	0.388508
C.sinensis	F.hygromet	74.00	156.42	0.7473	45.00	521.58	0.0917	0.122708
C.sinensis	C.tinctori	13.00	156.17	0.0882	10.00	521.83	0.0194	0.219955
C.sinensis	S.miltiorr	29.25	157.75	0.213	43.75	520.25	0.0892	0.418779
C.sinensis	C.sativa_a	14.00	156.67	0.0952	9.00	521.33	0.0175	0.183824
C.sinensis	G.max_atp6	18.50	157	0.1282	27.50	521	0.0547	0.426677
C.sinensis	D.hancocki	26.00	158.25	0.1854	44.00	519.75	0.0898	0.484358
C.sinensis	D.officina	24.50	158.25	0.1734	43.50	519.75	0.0887	0.511534
C.sinensis	D.huoshane	131.17	168.42	n.a.	195.83	509.58	0.5387	#VALUE!
C.taitunge	P.nudum_at	77.50	168.08	0.7154	69.50	509.92	0.1504	0.210232
C.taitunge	O.sativa_a	41.50	165.5	0.3052	62.50	512.5	0.1331	0.436107
C.taitunge	A.officina	39.50	165.67	0.2869	49.50	512.33	0.1034	0.360404
C.taitunge	M.baccata_	27.50	165.75	0.1875	45.50	512.25	0.0945	0.504
C.taitunge	V.vinifera	26.50	164.75	0.181	42.50	513.25	0.0877	0.48453
C.taitunge	C.coggygri	31.50	164.17	0.2216	62.50	513.83	0.1327	0.598827
C.taitunge	O.fragrans	27.50	165.42	0.1879	44.50	512.58	0.0923	0.491219
C.taitunge	C.quinoa_a	29.00	164.5	0.201	53.00	513.5	0.111	0.552239
C.taitunge	C.japonica	27.00	165.42	0.1841	46.00	512.58	0.0956	0.519283
C.taitunge	B.juncea_a	29.50	163.25	0.2068	70.50	514.75	0.1512	0.731141
C.taitunge	B.umbellat	37.00	165.67	0.2651	52.00	512.33	0.1091	0.411543
C.taitunge	F.hygromet	70.67	164	0.6409	82.33	514	0.1802	0.281167
C.taitunge	C.tinctori	27.50	163.75	0.1901	59.50	514.25	0.1257	0.661231
C.taitunge	S.miltiorr	42.25	165.33	0.3125	83.75	512.67	0.1842	0.58944
C.taitunge	C.sativa_a	27.00	164.25	0.1856	61.00	513.75	0.1293	0.696659
C.taitunge	G.max_atp6	34.50	164.58	0.2459	48.50	513.42	0.101	0.410736
C.taitunge	D.hancocki	41.83	165.83	0.3075	54.17	512.17	0.114	0.370732
C.taitunge	D.officina	40.00	165.83	0.291	54.00	512.17	0.1136	0.390378
C.taitunge	D.huoshane	131.08	176	3.7274	225.92	502	0.6873	0.184391
P.nudum_at	O.sativa_a	92.33	162.75	1.0593	79.67	515.25	0.1732	0.163504
P.nudum_at	A.officina	89.83	162.92	0.9966	70.17	515.08	0.1503	0.150813
P.nudum_at	M.baccata_	83.33	163	0.8585	65.67	515	0.1398	0.162842
P.nudum_at	V.vinifera	81.83	162	0.8396	60.17	516	0.1267	0.150905
P.nudum_at	C.coggygri	84.17	161.42	0.8912	62.83	516.58	0.1327	0.1489
P.nudum_at	O.fragrans	78.17	162.67	0.7677	66.83	515.33	0.1424	0.185489
P.nudum_at	C.quinoa_a	80.67	161.75	0.8201	66.33	516.25	0.1409	0.171808
P.nudum_at	C.japonica	82.17	162.67	0.8395	68.83	515.33	0.1471	0.175223
P.nudum_at	B.juncea_a	81.33	160.5	0.8445	76.67	517.5	0.165	0.195382
P.nudum_at	B.umbellat	89.83	162.92	0.9966	74.17	515.08	0.1599	0.160446
P.nudum_at	F.hygromet	67.00	161.25	0.6056	43.00	516.75	0.0882	0.145641
P.nudum_at	C.tinctori	80.67	161	0.8271	65.33	517	0.1384	0.167332
P.nudum_at	S.miltiorr	83.83	162.58	0.8724	79.17	515.42	0.1719	0.197043
P.nudum_at	C.sativa_a	84.17	161.5	0.8903	65.83	516.5	0.1397	0.156913
P.nudum_at	G.max_atp6	88.17	161.83	0.9721	64.83	516.17	0.1375	0.141446
P.nudum_at	D.hancocki	90.83	163.08	1.0179	70.17	514.92	0.1504	0.147755
P.nudum_at	D.officina	89.33	163.08	0.983	69.67	514.92	0.1492	0.15178
P.nudum_at	D.huoshane	133.25	173.25	n.a.	217.75	504.75	0.6421	#VALUE!
O.sativa_a	A.officina	14.25	160.33	0.0946	32.75	517.67	0.0661	0.698732
O.sativa_a	M.baccata_	26.50	160.42	0.1866	42.50	517.58	0.087	0.466238
O.sativa_a	V.vinifera	25.00	159.42	0.1759	44.00	518.58	0.09	0.511654
O.sativa_a	C.coggygri	29.00	158.83	0.2092	46.00	519.17	0.0943	0.450765
O.sativa_a	O.fragrans	26.00	160.08	0.183	42.00	517.92	0.0858	0.468852
O.sativa_a	C.quinoa_a	25.00	159.17	0.1762	41.00	518.83	0.0835	0.473893
O.sativa_a	C.japonica	26.17	160.08	0.1844	38.83	517.92	0.079	0.428416
O.sativa_a	B.juncea_a	29.50	157.92	0.2148	49.50	520.08	0.1018	0.473929
O.sativa_a	B.umbellat	21.33	160.33	0.1465	42.67	517.67	0.0873	0.595904
O.sativa_a	F.hygromet	77.00	158.67	0.7811	69.00	519.33	0.1462	0.187172
O.sativa_a	C.tinctori	28.00	158.42	0.2016	44.00	519.58	0.0899	0.445933
O.sativa_a	S.miltiorr	39.33	160	0.2979	61.67	518	0.1296	0.435045
O.sativa_a	C.sativa_a	29.17	158.92	0.2105	42.83	519.08	0.0874	0.415202
O.sativa_a	G.max_atp6	28.17	159.25	0.2017	42.83	518.75	0.0875	0.433813
O.sativa_a	D.hancocki	19.50	160.5	0.1325	36.50	517.5	0.0741	0.559245
O.sativa_a	D.officina	18.00	160.5	0.1215	36.00	517.5	0.073	0.600823
O.sativa_a	D.huoshane	134.17	170.67	n.a.	206.83	507.33	0.5883	#VALUE!
A.officina	M.baccata_	21.00	160.58	0.1437	28.00	517.42	0.0562	0.391093
A.officina	V.vinifera	19.00	159.58	0.1296	24.00	518.42	0.0478	0.368827
A.officina	C.coggygri	22.50	159	0.1568	44.50	519	0.0911	0.580995
A.officina	O.fragrans	21.00	160.25	0.144	21.00	517.75	0.0417	0.289583
A.officina	C.quinoa_a	23.00	159.33	0.1603	28.00	518.67	0.056	0.349345
A.officina	C.japonica	22.00	160.25	0.1516	20.00	517.75	0.0397	0.261873
A.officina	B.juncea_a	24.00	158.08	0.1696	46.00	519.92	0.0941	0.554835
A.officina	B.umbellat	16.50	160.5	0.1106	18.50	517.5	0.0366	0.330922
A.officina	F.hygromet	75.00	158.83	0.7449	68.00	519.17	0.144	0.193315
A.officina	C.tinctori	22.00	158.58	0.1534	43.00	519.42	0.0877	0.571708
A.officina	S.miltiorr	33.00	160.17	0.2409	56.00	517.83	0.1168	0.484848
A.officina	C.sativa_a	21.00	159.08	0.1452	40.00	518.92	0.0813	0.559917
A.officina	G.max_atp6	26.00	159.42	0.1839	26.00	518.58	0.0519	0.282219
A.officina	D.hancocki	13.50	160.67	0.0891	16.50	517.33	0.0326	0.365881
A.officina	D.officina	12.00	160.67	0.0787	16.00	517.33	0.0316	0.401525
A.officina	D.huoshane	133	170.83	n.a.	213	507.17	0.6157	#VALUE!
M.baccata_	V.vinifera	3.00	159.67	0.019	10.00	518.33	0.0195	1.02632
M.baccata_	C.coggygri	6.50	159.08	0.042	29.50	518.92	0.0591	1.40714
M.baccata_	O.fragrans	7.00	160.33	0.045	14.00	517.67	0.0275	0.611111
M.baccata_	C.quinoa_a	9.00	159.42	0.0587	16.00	518.58	0.0315	0.536627
M.baccata_	C.japonica	7.00	160.33	0.045	19.00	517.67	0.0376	0.835556
M.baccata_	B.juncea_a	9.00	158.17	0.0592	38.00	519.83	0.0769	1.29899
M.baccata_	B.umbellat	21.50	160.58	0.1475	26.50	517.42	0.053	0.359322
M.baccata_	F.hygromet	69.50	158.92	0.6562	59.50	519.08	0.1244	0.189576
M.baccata_	C.tinctori	5.00	158.67	0.0322	28.00	519.33	0.056	1.73913
M.baccata_	S.miltiorr	23.75	160.25	0.1651	51.25	517.75	0.1062	0.643247
M.baccata_	C.sativa_a	5.00	159.17	0.0321	27.00	518.83	0.0539	1.67913
M.baccata_	G.max_atp6	12.00	159.5	0.0793	18.00	518.5	0.0355	0.447667
M.baccata_	D.hancocki	20.00	160.75	0.136	28.00	517.25	0.0562	0.413235
M.baccata_	D.officina	18.50	160.75	0.1249	27.50	517.25	0.0551	0.441153
M.baccata_	D.huoshane	132	170.92	n.a.	211	507.08	0.6069	#VALUE!
V.vinifera	C.coggygri	7.00	158.08	0.0456	33.00	519.92	0.0663	1.45395
V.vinifera	O.fragrans	5.00	159.33	0.0321	14.00	518.67	0.0275	0.856698
V.vinifera	C.quinoa_a	7.00	158.42	0.0455	20.00	519.58	0.0395	0.868132
V.vinifera	C.japonica	5.00	159.33	0.0321	17.00	518.67	0.0335	1.04361
V.vinifera	B.juncea_a	9.50	157.17	0.063	41.50	520.83	0.0842	1.33651
V.vinifera	B.umbellat	19.50	159.58	0.1334	24.50	518.42	0.0488	0.365817
V.vinifera	F.hygromet	69.00	157.92	0.6553	61.00	520.08	0.1275	0.194567
V.vinifera	C.tinctori	5.50	157.67	0.0357	31.50	520.33	0.0631	1.76751
V.vinifera	S.miltiorr	23.25	159.25	0.1624	48.75	518.75	0.1004	0.618227
V.vinifera	C.sativa_a	5.50	158.17	0.0356	30.50	519.83	0.0611	1.71629
V.vinifera	G.max_atp6	11.50	158.5	0.0763	17.50	519.5	0.0345	0.452163
V.vinifera	D.hancocki	20.00	159.75	0.137	26.00	518.25	0.0519	0.378832
V.vinifera	D.officina	18.50	159.75	0.1258	25.50	518.25	0.0509	0.40461
V.vinifera	D.huoshane	130	169.92	n.a.	211	508.08	0.6051	#VALUE!
C.coggygri	O.fragrans	9.50	158.75	0.0624	29.50	519.25	0.0591	0.947115
C.coggygri	C.quinoa_a	11.00	157.83	0.0731	20.00	520.17	0.0395	0.540356
C.coggygri	C.japonica	9.50	158.75	0.0624	30.50	519.25	0.0612	0.980769
C.coggygri	B.juncea_a	7.00	156.58	0.0461	18.00	521.42	0.0353	0.765727
C.coggygri	B.umbellat	23.00	159	0.1607	40.00	519	0.0813	0.505912
C.coggygri	F.hygromet	70.00	157.33	0.6746	41.00	520.67	0.0832	0.123332
C.coggygri	C.tinctori	3.00	157.08	0.0193	10.00	520.92	0.0194	1.00518
C.coggygri	S.miltiorr	27.25	158.67	0.195	42.75	519.33	0.0872	0.447179
C.coggygri	C.sativa_a	6.00	157.58	0.0391	9.00	520.42	0.0175	0.44757
C.coggygri	G.max_atp6	13.50	157.92	0.0908	29.50	520.08	0.059	0.64978
C.coggygri	D.hancocki	24.00	159.17	0.1683	48.00	518.83	0.0987	0.586453
C.coggygri	D.officina	22.50	159.17	0.1566	47.50	518.83	0.0976	0.623244
C.coggygri	D.huoshane	132.83	169.33	n.a.	192.17	508.67	0.5255	#VALUE!
O.fragrans	C.quinoa_a	10.00	159.08	0.0657	16.00	518.92	0.0315	0.479452
O.fragrans	C.japonica	8.00	160	0.0517	12.00	518	0.0235	0.454545
O.fragrans	B.juncea_a	12.00	157.83	0.0802	38.00	520.17	0.0769	0.958853
O.fragrans	B.umbellat	22.50	160.25	0.1555	22.50	517.75	0.0448	0.288103
O.fragrans	F.hygromet	67.50	158.58	0.6287	60.50	519.42	0.1266	0.201368
O.fragrans	C.tinctori	9.00	158.33	0.0591	28.00	519.67	0.0559	0.945854
O.fragrans	S.miltiorr	18.75	159.92	0.1275	45.25	518.08	0.0929	0.728627
O.fragrans	C.sativa_a	8.00	158.83	0.0521	29.00	519.17	0.058	1.11324
O.fragrans	G.max_atp6	14.00	159.17	0.0936	16.00	518.83	0.0315	0.336538
O.fragrans	D.hancocki	25.00	160.42	0.1747	26.00	517.58	0.052	0.297653
O.fragrans	D.officina	23.50	160.42	0.163	25.50	517.58	0.051	0.312883
O.fragrans	D.huoshane	131.17	170.58	n.a.	210.83	507.42	0.6056	#VALUE!
C.quinoa_a	C.japonica	5.00	159.08	0.0321	19.00	518.92	0.0375	1.16822
C.quinoa_a	B.juncea_a	14.00	156.92	0.095	27.00	521.08	0.0537	0.565263
C.quinoa_a	B.umbellat	21.50	159.33	0.1488	26.50	518.67	0.0529	0.355511
C.quinoa_a	F.hygromet	66.00	157.67	0.6126	55.00	520.33	0.1139	0.185929
C.quinoa_a	C.tinctori	11.00	157.42	0.0734	17.00	520.58	0.0334	0.455041
C.quinoa_a	S.miltiorr	24.75	159	0.1745	42.25	519	0.0862	0.493983
C.quinoa_a	C.sativa_a	10.00	157.92	0.0662	19.00	520.08	0.0375	0.566465
C.quinoa_a	G.max_atp6	16.00	158.25	0.1086	19.00	519.75	0.0375	0.345304
C.quinoa_a	D.hancocki	23.00	159.5	0.1601	33.00	518.5	0.0665	0.415365
C.quinoa_a	D.officina	21.50	159.5	0.1486	32.50	518.5	0.0655	0.440781
C.quinoa_a	D.huoshane	126.17	169.67	3.5746	201.83	508.33	0.5653	0.158144
C.japonica	B.juncea_a	13.00	157.83	0.0872	36.00	520.17	0.0726	0.832569
C.japonica	B.umbellat	20.50	160.25	0.1403	23.50	517.75	0.0468	0.333571
C.japonica	F.hygromet	67.50	158.58	0.6287	65.50	519.42	0.1381	0.21966
C.japonica	C.tinctori	8.00	158.33	0.0523	30.00	519.67	0.0601	1.14914
C.japonica	S.miltiorr	22.25	159.92	0.1539	49.75	518.08	0.1028	0.667966
C.japonica	C.sativa_a	9.00	158.83	0.0589	28.00	519.17	0.056	0.950764
C.japonica	G.max_atp6	11.00	159.17	0.0725	19.00	518.83	0.0375	0.517241
C.japonica	D.hancocki	20.50	160.42	0.1401	25.50	517.58	0.051	0.364026
C.japonica	D.officina	19.00	160.42	0.1289	25.00	517.58	0.0499	0.387122
C.japonica	D.huoshane	128.33	170.58	n.a.	208.67	507.42	0.5961	#VALUE!
B.juncea_a	B.umbellat	20.50	158.08	0.1424	45.50	519.92	0.0931	0.653792
B.juncea_a	F.hygromet	70.67	156.42	0.6917	48.33	521.58	0.0989	0.142981
B.juncea_a	C.tinctori	8.00	156.17	0.0531	16.00	521.83	0.0313	0.589454
B.juncea_a	S.miltiorr	26.25	157.75	0.1881	50.75	520.25	0.1045	0.555556
B.juncea_a	C.sativa_a	7.00	156.67	0.0461	17.00	521.33	0.0333	0.722343
B.juncea_a	G.max_atp6	17.00	157	0.1169	36.00	521	0.0725	0.620188
B.juncea_a	D.hancocki	26.50	158.25	0.1895	48.50	519.75	0.0997	0.526121
B.juncea_a	D.officina	25.00	158.25	0.1774	48.00	519.75	0.0986	0.555806
B.juncea_a	D.huoshane	132.42	168.42	n.a.	193.58	509.58	0.5297	#VALUE!
B.umbellat	F.hygromet	66.00	158.83	0.6056	71.00	519.17	0.151	0.249339
B.umbellat	C.tinctori	23.50	158.58	0.1651	37.50	519.42	0.0759	0.459721
B.umbellat	S.miltiorr	36.75	160.17	0.2739	58.25	517.83	0.1219	0.445053
B.umbellat	C.sativa_a	20.50	159.08	0.1414	37.50	518.92	0.076	0.537482
B.umbellat	G.max_atp6	21.50	159.42	0.1487	27.50	518.58	0.055	0.369872
B.umbellat	D.hancocki	19.50	160.67	0.1324	28.50	517.33	0.0572	0.432024
B.umbellat	D.officina	18.00	160.67	0.1213	28.00	517.33	0.0562	0.463314
B.umbellat	D.huoshane	132.83	170.83	n.a.	214.17	507.17	0.6209	#VALUE!
F.hygromet	C.tinctori	67.50	156.92	0.6392	42.50	521.08	0.0863	0.135013
F.hygromet	S.miltiorr	72.25	158.5	0.702	70.75	519.5	0.1503	0.214103
F.hygromet	C.sativa_a	70.00	157.42	0.674	40.00	520.58	0.0811	0.120326
F.hygromet	G.max_atp6	71.00	157.75	0.6874	62.00	520.25	0.1298	0.188827
F.hygromet	D.hancocki	71.00	159	0.6786	69.00	519	0.1463	0.215591
F.hygromet	D.officina	71.00	159	0.6786	69.00	519	0.1463	0.215591
F.hygromet	D.huoshane	135.42	169.17	n.a.	191.58	508.83	0.5229	#VALUE!
C.tinctori	S.miltiorr	23.75	158.25	0.1675	41.25	519.75	0.0839	0.500896
C.tinctori	C.sativa_a	3.00	157.17	0.0193	9.00	520.83	0.0175	0.906736
C.tinctori	G.max_atp6	11.00	157.5	0.0733	29.00	520.5	0.0579	0.789905
C.tinctori	D.hancocki	21.50	158.75	0.1494	45.50	519.25	0.0932	0.623829
C.tinctori	D.officina	20.00	158.75	0.1379	45.00	519.25	0.0921	0.667875
C.tinctori	D.huoshane	132	168.92	n.a.	197	509.08	0.5442	#VALUE!
S.miltiorr	C.sativa_a	23.75	158.75	0.1669	45.25	519.25	0.0926	0.554823
S.miltiorr	G.max_atp6	30.75	159.08	0.2235	46.25	518.92	0.0949	0.424609
S.miltiorr	D.hancocki	37.00	160.33	0.2758	57.00	517.67	0.1191	0.431835
S.miltiorr	D.officina	37.50	160.33	0.2803	56.50	517.67	0.118	0.420978
S.miltiorr	D.huoshane	133.83	170.5	n.a.	205.17	507.5	0.5808	#VALUE!
C.sativa_a	G.max_atp6	15.00	158	0.1015	27.00	520	0.0538	0.530049
C.sativa_a	D.hancocki	23.50	159.25	0.1643	43.50	518.75	0.0889	0.541083
C.sativa_a	D.officina	22.00	159.25	0.1527	43.00	518.75	0.0878	0.574984
C.sativa_a	D.huoshane	134.33	169.42	n.a.	191.67	508.58	0.5236	#VALUE!
G.max_atp6	D.hancocki	24.50	159.58	0.1718	27.50	518.42	0.055	0.32014
G.max_atp6	D.officina	23.00	159.58	0.1601	27.00	518.42	0.054	0.337289
G.max_atp6	D.huoshane	136	169.75	n.a.	205	508.25	0.5788	#VALUE!
D.hancocki	D.officina	2.00	160.83	0.0125	0.00	517.17	0	0
D.hancocki	D.huoshane	136.25	171	n.a.	210.75	507	0.606	#VALUE!
D.officina	D.huoshane	136.25	171	n.a.	210.75	507	0.606	#VALUE!

## Sheet: atp9
Seq 1	Seq 2	SynDif	SynPos	Ks	NSynDif	NSynPos	Ka	Ka/Ks
G.elata_at	A.thaliana	9.00	57.08	0.177	4.00	167.92	0.0242	0.136723
G.elata_at	Z.mays_atp	8.00	58.08	0.1522	7.00	166.92	0.0432	0.283837
G.elata_at	G.biloba_a	12.00	59.17	0.2365	22.00	165.83	0.146	0.617336
G.elata_at	F.gracilis	14.00	58.83	0.2863	6.00	166.17	0.037	0.129235
G.elata_at	C.sinensis	9.00	57.08	0.177	3.00	167.92	0.0181	0.10226
G.elata_at	C.taitunge	11.00	58.50	0.2165	11.00	166.5	0.0692	0.31963
G.elata_at	P.nudum_at	26.50	58.83	0.6883	16.50	166.17	0.1065	0.154729
G.elata_at	O.sativa_a	8.00	58.50	0.151	5.00	166.5	0.0306	0.202649
G.elata_at	A.officina	8.00	58.67	0.1505	4.00	166.33	0.0244	0.162126
G.elata_at	M.baccata_	10.00	58.50	0.194	4.00	166.5	0.0244	0.125773
G.elata_at	V.vinifera	9.00	57.75	0.1747	4.00	167.25	0.0243	0.139096
G.elata_at	C.coggygri	8.00	58.33	0.1515	2.00	166.67	0.0121	0.079868
G.elata_at	O.fragrans	15.50	57.92	0.331	7.50	167.08	0.0463	0.139879
G.elata_at	C.quinoa_a	17.50	57.08	0.3941	4.50	167.92	0.0273	0.0692718
G.elata_at	C.japonica	11.00	58.17	0.2179	5.00	166.83	0.0306	0.140431
G.elata_at	B.juncea_a	10.00	57.08	0.1995	4.00	167.92	0.0242	0.121303
G.elata_at	B.umbellat	27.00	56.42	0.7623	8.00	168.58	0.049	0.0642792
G.elata_at	F.hygromet	22.50	56.58	0.5666	11.50	168.42	0.0716	0.126368
G.elata_at	C.tinctori	12.50	59.50	0.2465	7.50	165.5	0.0467	0.189452
G.elata_at	S.miltiorr	29.50	56.58	0.8909	6.50	168.42	0.0396	0.0444494
G.elata_at	C.sativa_a	8.00	58.33	0.1515	4.00	166.67	0.0244	0.161056
G.elata_at	G.max_atp9	25.50	57.08	0.6791	7.50	167.92	0.0461	0.067884
G.elata_at	D.hancocki	0.00	58.50	0	2.00	166.5	0.0121	#DIV/0!
G.elata_at	D.officina	0.00	58.50	0	2.00	166.5	0.0121	#DIV/0!
G.elata_at	D.huoshane	0.00	58.50	0	2.00	166.5	0.0121	#DIV/0!
A.thaliana	Z.mays_atp	11.00	57.17	0.2224	6.00	167.83	0.0366	0.164568
A.thaliana	G.biloba_a	12.00	58.25	0.2409	21.00	166.75	0.1379	0.572437
A.thaliana	F.gracilis	6.00	57.92	0.1115	6.00	167.08	0.0368	0.330045
A.thaliana	C.sinensis	5.00	56.17	0.0948	5.00	168.83	0.0302	0.318565
A.thaliana	C.taitunge	10.00	57.58	0.1975	12.00	167.42	0.0753	0.381266
A.thaliana	P.nudum_at	24.00	57.92	0.6031	15.00	167.08	0.0956	0.158514
A.thaliana	O.sativa_a	9.00	57.58	0.1753	7.00	167.42	0.043	0.245294
A.thaliana	A.officina	10.00	57.75	0.1969	6.00	167.25	0.0368	0.186897
A.thaliana	M.baccata_	4.00	57.58	0.0729	4.00	167.42	0.0243	0.333333
A.thaliana	V.vinifera	5.00	56.83	0.0936	4.00	168.17	0.0242	0.258547
A.thaliana	C.coggygri	4.00	57.42	0.0731	6.00	167.58	0.0367	0.502052
A.thaliana	O.fragrans	10.50	57.00	0.2114	7.50	168	0.046	0.217597
A.thaliana	C.quinoa_a	12.50	56.17	0.264	6.50	168.83	0.0395	0.149621
A.thaliana	C.japonica	6.00	57.25	0.1129	9.00	167.75	0.0557	0.493357
A.thaliana	B.juncea_a	2.00	56.17	0.0365	0.00	168.83	0	0
A.thaliana	B.umbellat	29.00	55.50	0.8948	7.00	169.5	0.0425	0.0474966
A.thaliana	F.hygromet	22.50	55.67	0.5806	5.50	169.33	0.0332	0.0571822
A.thaliana	C.tinctori	8.50	58.58	0.1612	7.50	166.42	0.0465	0.288462
A.thaliana	S.miltiorr	25.50	55.67	0.7077	6.50	169.33	0.0394	0.0556733
A.thaliana	C.sativa_a	4.00	57.42	0.0731	6.00	167.58	0.0367	0.502052
A.thaliana	G.max_atp9	22.50	56.17	0.5729	4.50	168.83	0.0271	0.0473032
A.thaliana	D.hancocki	9.00	57.58	0.1753	6.00	167.42	0.0367	0.209355
A.thaliana	D.officina	9.00	57.58	0.1753	6.00	167.42	0.0367	0.209355
A.thaliana	D.huoshane	9.00	57.58	0.1753	6.00	167.42	0.0367	0.209355
Z.mays_atp	G.biloba_a	17.00	59.25	0.3616	19.00	165.75	0.1244	0.344027
Z.mays_atp	F.gracilis	14.00	58.92	0.2858	9.00	166.08	0.0562	0.196641
Z.mays_atp	C.sinensis	12.00	57.17	0.2463	5.00	167.83	0.0304	0.123427
Z.mays_atp	C.taitunge	16.00	58.58	0.3396	12.00	166.42	0.0758	0.223204
Z.mays_atp	P.nudum_at	24.50	58.92	0.6063	15.50	166.08	0.0997	0.16444
Z.mays_atp	O.sativa_a	4.00	58.58	0.0716	4.00	166.42	0.0244	0.340782
Z.mays_atp	A.officina	11.00	58.75	0.2154	7.00	166.25	0.0433	0.201021
Z.mays_atp	M.baccata_	11.00	58.58	0.2161	7.00	166.42	0.0433	0.20037
Z.mays_atp	V.vinifera	11.00	57.83	0.2194	6.00	167.17	0.0368	0.16773
Z.mays_atp	C.coggygri	10.00	58.42	0.1943	7.00	166.58	0.0432	0.222337
Z.mays_atp	O.fragrans	18.50	58.00	0.4154	5.50	167	0.0337	0.0811266
Z.mays_atp	C.quinoa_a	18.50	57.17	0.4235	11.50	167.83	0.0719	0.169776
Z.mays_atp	C.japonica	12.00	58.25	0.2409	4.00	166.75	0.0244	0.101287
Z.mays_atp	B.juncea_a	12.00	57.17	0.2463	6.00	167.83	0.0366	0.148599
Z.mays_atp	B.umbellat	29.00	56.50	0.8649	7.00	168.5	0.0427	0.0493699
Z.mays_atp	F.hygromet	28.50	56.67	0.8328	8.50	168.33	0.0523	0.0628002
Z.mays_atp	C.tinctori	13.50	59.58	0.2698	6.50	165.42	0.0404	0.149741
Z.mays_atp	S.miltiorr	29.50	56.67	0.8884	6.50	168.33	0.0396	0.0445745
Z.mays_atp	C.sativa_a	9.00	58.42	0.1725	9.00	166.58	0.0561	0.325217
Z.mays_atp	G.max_atp9	25.50	57.17	0.6774	8.50	167.83	0.0524	0.0773546
Z.mays_atp	D.hancocki	8.00	58.58	0.1507	7.00	166.42	0.0433	0.287326
Z.mays_atp	D.officina	8.00	58.58	0.1507	7.00	166.42	0.0433	0.287326
Z.mays_atp	D.huoshane	8.00	58.58	0.1507	7.00	166.42	0.0433	0.287326
G.biloba_a	F.gracilis	14.00	60.00	0.2795	21.00	165	0.1395	0.499106
G.biloba_a	C.sinensis	12.00	58.25	0.2409	20.00	166.75	0.1307	0.542549
G.biloba_a	C.taitunge	4.00	59.67	0.0702	13.00	165.33	0.0831	1.18376
G.biloba_a	P.nudum_at	24.00	60.00	0.5716	15.00	165	0.0969	0.169524
G.biloba_a	O.sativa_a	15.00	59.67	0.3062	17.00	165.33	0.1106	0.361202
G.biloba_a	A.officina	13.00	59.83	0.2565	19.00	165.17	0.1249	0.48694
G.biloba_a	M.baccata_	11.00	59.67	0.2116	19.00	165.33	0.1247	0.589319
G.biloba_a	V.vinifera	11.50	58.92	0.2261	21.50	166.08	0.1421	0.628483
G.biloba_a	C.coggygri	11.00	59.50	0.2123	19.00	165.5	0.1246	0.586905
G.biloba_a	O.fragrans	14.00	59.08	0.2848	17.00	165.92	0.1102	0.386938
G.biloba_a	C.quinoa_a	16.00	58.25	0.3421	20.00	166.75	0.1307	0.382052
G.biloba_a	C.japonica	8.00	59.33	0.1486	16.00	165.67	0.1034	0.695828
G.biloba_a	B.juncea_a	10.00	58.25	0.195	21.00	166.75	0.1379	0.707179
G.biloba_a	B.umbellat	33.50	57.58	1.121	21.50	167.42	0.1409	0.125691
G.biloba_a	F.hygromet	23.00	57.75	0.5679	17.00	167.25	0.1092	0.192287
G.biloba_a	C.tinctori	12.50	60.67	0.2409	16.50	164.33	0.1078	0.447489
G.biloba_a	S.miltiorr	33.50	57.75	1.1136	18.50	167.25	0.1197	0.107489
G.biloba_a	C.sativa_a	11.50	59.50	0.2235	19.50	165.5	0.1282	0.573602
G.biloba_a	G.max_atp9	29.50	58.25	0.8435	21.50	166.75	0.1415	0.167753
G.biloba_a	D.hancocki	12.00	59.67	0.2341	22.00	165.33	0.1465	0.625801
G.biloba_a	D.officina	12.00	59.67	0.2341	22.00	165.33	0.1465	0.625801
G.biloba_a	D.huoshane	12.00	59.67	0.2341	22.00	165.33	0.1465	0.625801
F.gracilis	C.sinensis	8.00	57.92	0.1527	7.00	167.08	0.0431	0.282253
F.gracilis	C.taitunge	12.00	59.33	0.2357	12.00	165.67	0.0762	0.323292
F.gracilis	P.nudum_at	27.00	59.67	0.6935	17.00	165.33	0.1106	0.159481
F.gracilis	O.sativa_a	13.00	59.33	0.2591	9.00	165.67	0.0564	0.217677
F.gracilis	A.officina	14.00	59.50	0.2824	8.00	165.5	0.05	0.177054
F.gracilis	M.baccata_	6.00	59.33	0.1086	2.00	165.67	0.0122	0.112339
F.gracilis	V.vinifera	9.00	58.58	0.1719	4.00	166.42	0.0244	0.141943
F.gracilis	C.coggygri	8.00	59.17	0.1491	4.00	165.83	0.0245	0.164319
F.gracilis	O.fragrans	14.50	58.75	0.2993	9.50	166.25	0.0594	0.198463
F.gracilis	C.quinoa_a	14.50	57.92	0.3046	8.50	167.08	0.0527	0.173014
F.gracilis	C.japonica	9.00	59.00	0.1705	9.00	166	0.0563	0.330205
F.gracilis	B.juncea_a	6.00	57.92	0.1115	6.00	167.08	0.0368	0.330045
F.gracilis	B.umbellat	29.00	57.25	0.8439	12.00	167.75	0.0752	0.0891101
F.gracilis	F.hygromet	25.50	57.42	0.6727	12.50	167.58	0.0786	0.116843
F.gracilis	C.tinctori	11.50	60.33	0.2199	5.50	164.67	0.0342	0.155525
F.gracilis	S.miltiorr	27.50	57.42	0.7633	10.50	167.58	0.0654	0.0856806
F.gracilis	C.sativa_a	10.00	59.17	0.1915	4.00	165.83	0.0245	0.127937
F.gracilis	G.max_atp9	24.50	57.92	0.6226	11.50	167.08	0.0722	0.115965
F.gracilis	D.hancocki	14.00	59.33	0.2833	6.00	165.67	0.0371	0.130957
F.gracilis	D.officina	14.00	59.33	0.2833	6.00	165.67	0.0371	0.130957
F.gracilis	D.huoshane	14.00	59.33	0.2833	6.00	165.67	0.0371	0.130957
C.sinensis	C.taitunge	10.00	57.58	0.1975	11.00	167.42	0.0688	0.348354
C.sinensis	P.nudum_at	22.00	57.92	0.5296	16.00	167.08	0.1024	0.193353
C.sinensis	O.sativa_a	10.00	57.58	0.1975	8.00	167.42	0.0494	0.250127
C.sinensis	A.officina	10.00	57.75	0.1969	7.00	167.25	0.0431	0.218893
C.sinensis	M.baccata_	2.00	57.58	0.0356	5.00	167.42	0.0305	0.856742
C.sinensis	V.vinifera	4.00	56.83	0.0739	3.00	168.17	0.0181	0.244926
C.sinensis	C.coggygri	1.00	57.42	0.0176	3.00	167.58	0.0181	1.02841
C.sinensis	O.fragrans	11.50	57.00	0.235	8.50	168	0.0524	0.222979
C.sinensis	C.quinoa_a	12.50	56.17	0.264	5.50	168.83	0.0333	0.126136
C.sinensis	C.japonica	8.00	57.25	0.1546	6.00	167.75	0.0366	0.23674
C.sinensis	B.juncea_a	4.00	56.17	0.0748	5.00	168.83	0.0302	0.403743
C.sinensis	B.umbellat	27.00	55.50	0.7845	6.00	169.5	0.0363	0.0462715
C.sinensis	F.hygromet	24.50	55.67	0.6629	8.50	169.33	0.052	0.0784432
C.sinensis	C.tinctori	10.00	58.58	0.1937	6.00	166.42	0.0369	0.190501
C.sinensis	S.miltiorr	28.50	55.67	0.8608	5.50	169.33	0.0332	0.0385688
C.sinensis	C.sativa_a	6.00	57.42	0.1125	3.00	167.58	0.0181	0.160889
C.sinensis	G.max_atp9	22.50	56.17	0.5729	7.50	168.83	0.0458	0.0799441
C.sinensis	D.hancocki	9.00	57.58	0.1753	3.00	167.42	0.0181	0.103252
C.sinensis	D.officina	9.00	57.58	0.1753	3.00	167.42	0.0181	0.103252
C.sinensis	D.huoshane	9.00	57.58	0.1753	3.00	167.42	0.0181	0.103252
C.taitunge	P.nudum_at	21.50	59.33	0.495	15.50	165.67	0.0999	0.201818
C.taitunge	O.sativa_a	14.00	59.00	0.2853	10.00	166	0.0628	0.220119
C.taitunge	A.officina	12.50	59.17	0.2481	9.50	165.83	0.0596	0.240226
C.taitunge	M.baccata_	9.00	59.00	0.1705	10.00	166	0.0628	0.368328
C.taitunge	V.vinifera	10.00	58.25	0.195	12.00	166.75	0.0757	0.388205
C.taitunge	C.coggygri	9.00	58.83	0.1711	10.00	166.17	0.0627	0.366452
C.taitunge	O.fragrans	12.00	58.42	0.24	8.00	166.58	0.0496	0.206667
C.taitunge	C.quinoa_a	14.00	57.58	0.2939	11.00	167.42	0.0688	0.234093
C.taitunge	C.japonica	8.00	58.67	0.1505	11.00	166.33	0.0692	0.459801
C.taitunge	B.juncea_a	8.00	57.58	0.1536	12.00	167.42	0.0753	0.490234
C.taitunge	B.umbellat	31.00	56.92	0.9715	15.00	168.08	0.095	0.0977869
C.taitunge	F.hygromet	21.50	57.08	0.5232	13.50	167.92	0.085	0.162462
C.taitunge	C.tinctori	11.00	60.00	0.2102	7.00	165	0.0437	0.207897
C.taitunge	S.miltiorr	32.00	57.08	1.0321	12.00	167.92	0.0751	0.0727643
C.taitunge	C.sativa_a	10.00	58.83	0.1927	10.00	166.17	0.0627	0.325376
C.taitunge	G.max_atp9	27.50	57.58	0.7595	14.50	167.42	0.092	0.121132
C.taitunge	D.hancocki	11.00	59.00	0.2144	13.00	166	0.0827	0.385728
C.taitunge	D.officina	11.00	59.00	0.2144	13.00	166	0.0827	0.385728
C.taitunge	D.huoshane	11.00	59.00	0.2144	13.00	166	0.0827	0.385728
P.nudum_at	O.sativa_a	26.50	59.33	0.6788	15.50	165.67	0.0999	0.147171
P.nudum_at	A.officina	29.00	59.50	0.7871	15.00	165.5	0.0966	0.122729
P.nudum_at	M.baccata_	23.00	59.33	0.5456	15.00	165.67	0.0965	0.17687
P.nudum_at	V.vinifera	21.50	58.58	0.504	17.50	166.42	0.1133	0.224802
P.nudum_at	C.coggygri	23.00	59.17	0.5478	15.00	165.83	0.0964	0.175977
P.nudum_at	O.fragrans	26.00	58.75	0.6688	17.00	166.25	0.1099	0.164324
P.nudum_at	C.quinoa_a	26.00	57.92	0.6845	18.00	167.08	0.1163	0.169905
P.nudum_at	C.japonica	24.00	59.00	0.5863	14.00	166	0.0895	0.152652
P.nudum_at	B.juncea_a	24.00	57.92	0.6031	15.00	167.08	0.0956	0.158514
P.nudum_at	B.umbellat	35.00	57.25	1.2661	18.00	167.75	0.1158	0.091462
P.nudum_at	F.hygromet	18.00	57.42	0.406	16.00	167.58	0.1021	0.251478
P.nudum_at	C.tinctori	24.00	60.33	0.5669	17.00	164.67	0.1111	0.195978
P.nudum_at	S.miltiorr	37.00	57.42	1.4704	17.00	167.58	0.109	0.0741295
P.nudum_at	C.sativa_a	24.50	59.17	0.6024	17.50	165.83	0.1137	0.188745
P.nudum_at	G.max_atp9	34.50	57.92	1.1858	17.50	167.08	0.1128	0.0951257
P.nudum_at	D.hancocki	26.50	59.33	0.6788	16.50	165.67	0.1069	0.157484
P.nudum_at	D.officina	26.50	59.33	0.6788	16.50	165.67	0.1069	0.157484
P.nudum_at	D.huoshane	26.50	59.33	0.6788	16.50	165.67	0.1069	0.157484
O.sativa_a	A.officina	9.00	59.17	0.17	3.00	165.83	0.0183	0.107647
O.sativa_a	M.baccata_	10.00	59.00	0.1921	7.00	166	0.0434	0.225924
O.sativa_a	V.vinifera	9.00	58.25	0.173	9.00	166.75	0.056	0.323699
O.sativa_a	C.coggygri	9.00	58.83	0.1711	7.00	166.17	0.0434	0.253653
O.sativa_a	O.fragrans	15.50	58.42	0.3275	4.50	166.58	0.0275	0.0839695
O.sativa_a	C.quinoa_a	14.50	57.58	0.3068	7.50	167.42	0.0462	0.150587
O.sativa_a	C.japonica	10.00	58.67	0.1934	2.00	166.33	0.0121	0.0625646
O.sativa_a	B.juncea_a	9.00	57.58	0.1753	7.00	167.42	0.043	0.245294
O.sativa_a	B.umbellat	27.00	56.92	0.7508	7.00	168.08	0.0428	0.0570059
O.sativa_a	F.hygromet	28.50	57.08	0.8218	8.50	167.92	0.0524	0.0637625
O.sativa_a	C.tinctori	11.50	60.00	0.2213	6.50	165	0.0405	0.183009
O.sativa_a	S.miltiorr	26.50	57.08	0.7237	5.50	167.92	0.0335	0.0462899
O.sativa_a	C.sativa_a	7.00	58.83	0.1296	9.00	166.17	0.0562	0.433642
O.sativa_a	G.max_atp9	24.50	57.58	0.6283	8.50	167.42	0.0526	0.083718
O.sativa_a	D.hancocki	8.00	59.00	0.1496	7.00	166	0.0434	0.290107
O.sativa_a	D.officina	8.00	59.00	0.1496	7.00	166	0.0434	0.290107
O.sativa_a	D.huoshane	8.00	59.00	0.1496	7.00	166	0.0434	0.290107
A.officina	M.baccata_	11.00	59.17	0.2137	6.00	165.83	0.0371	0.173608
A.officina	V.vinifera	10.00	58.42	0.1943	8.00	166.58	0.0496	0.255275
A.officina	C.coggygri	9.00	59.00	0.1705	6.00	166	0.037	0.217009
A.officina	O.fragrans	14.00	58.58	0.2877	3.00	166.42	0.0182	0.0632603
A.officina	C.quinoa_a	18.00	57.75	0.4029	4.00	167.25	0.0243	0.0603127
A.officina	C.japonica	9.00	58.83	0.1711	5.00	166.17	0.0307	0.179427
A.officina	B.juncea_a	10.00	57.75	0.1969	6.00	167.25	0.0368	0.186897
A.officina	B.umbellat	30.00	57.08	0.9048	8.00	167.92	0.0492	0.0543767
A.officina	F.hygromet	28.00	57.25	0.7919	6.00	167.75	0.0366	0.046218
A.officina	C.tinctori	10.50	60.17	0.1986	7.50	164.83	0.0469	0.236153
A.officina	S.miltiorr	32.00	57.25	1.0257	4.00	167.75	0.0242	0.0235936
A.officina	C.sativa_a	8.00	59.00	0.1496	8.00	166	0.0498	0.332888
A.officina	G.max_atp9	27.00	57.75	0.7324	5.00	167.25	0.0305	0.0416439
A.officina	D.hancocki	8.00	59.17	0.1491	6.00	165.83	0.0371	0.248826
A.officina	D.officina	8.00	59.17	0.1491	6.00	165.83	0.0371	0.248826
A.officina	D.huoshane	8.00	59.17	0.1491	6.00	165.83	0.0371	0.248826
M.baccata_	V.vinifera	3.00	58.25	0.0534	2.00	166.75	0.0121	0.226592
M.baccata_	C.coggygri	2.00	58.83	0.0348	2.00	166.17	0.0121	0.347701
M.baccata_	O.fragrans	11.50	58.42	0.2283	7.50	166.58	0.0464	0.203241
M.baccata_	C.quinoa_a	11.50	57.58	0.2322	6.50	167.42	0.0399	0.171835
M.baccata_	C.japonica	7.00	58.67	0.13	7.00	166.33	0.0433	0.333077
M.baccata_	B.juncea_a	3.00	57.58	0.054	4.00	167.42	0.0243	0.45
M.baccata_	B.umbellat	28.00	56.92	0.8002	10.00	168.08	0.062	0.0774806
M.baccata_	F.hygromet	25.50	57.08	0.6791	10.50	167.92	0.0653	0.0961567
M.baccata_	C.tinctori	8.50	60.00	0.157	3.50	165	0.0215	0.136943
M.baccata_	S.miltiorr	27.50	57.08	0.7711	8.50	167.92	0.0524	0.0679549
M.baccata_	C.sativa_a	5.00	58.83	0.0902	2.00	166.17	0.0121	0.134146
M.baccata_	G.max_atp9	22.50	57.58	0.552	9.50	167.42	0.059	0.106884
M.baccata_	D.hancocki	10.00	59.00	0.1921	4.00	166	0.0245	0.127538
M.baccata_	D.officina	10.00	59.00	0.1921	4.00	166	0.0245	0.127538
M.baccata_	D.huoshane	10.00	59.00	0.1921	4.00	166	0.0245	0.127538
V.vinifera	C.coggygri	3.00	58.08	0.0535	2.00	166.92	0.0121	0.226168
V.vinifera	O.fragrans	11.50	57.67	0.2318	7.50	167.33	0.0462	0.19931
V.vinifera	C.quinoa_a	12.50	56.83	0.2603	6.50	168.17	0.0397	0.152516
V.vinifera	C.japonica	8.00	57.92	0.1527	7.00	167.08	0.0431	0.282253
V.vinifera	B.juncea_a	4.00	56.83	0.0739	4.00	168.17	0.0242	0.32747
V.vinifera	B.umbellat	30.00	56.17	0.934	9.00	168.83	0.0553	0.0592077
V.vinifera	F.hygromet	26.50	56.33	0.7401	9.50	168.67	0.0586	0.0791785
V.vinifera	C.tinctori	8.50	59.25	0.1592	5.50	165.75	0.0339	0.21294
V.vinifera	S.miltiorr	27.50	56.33	0.7893	8.50	168.67	0.0522	0.0661345
V.vinifera	C.sativa_a	4.00	58.08	0.0722	2.00	166.92	0.0121	0.16759
V.vinifera	G.max_atp9	25.50	56.83	0.6839	8.50	168.17	0.0523	0.0764732
V.vinifera	D.hancocki	9.00	58.25	0.173	4.00	166.75	0.0244	0.14104
V.vinifera	D.officina	9.00	58.25	0.173	4.00	166.75	0.0244	0.14104
V.vinifera	D.huoshane	9.00	58.25	0.173	4.00	166.75	0.0244	0.14104
C.coggygri	O.fragrans	10.50	58.25	0.2062	7.50	166.75	0.0464	0.225024
C.coggygri	C.quinoa_a	11.50	57.42	0.233	6.50	167.58	0.0398	0.170815
C.coggygri	C.japonica	7.00	58.50	0.1304	5.00	166.5	0.0306	0.234663
C.coggygri	B.juncea_a	3.00	57.42	0.0542	6.00	167.58	0.0367	0.677122
C.coggygri	B.umbellat	27.00	56.75	0.7546	10.00	168.25	0.0619	0.0820302
C.coggygri	F.hygromet	22.50	56.92	0.5616	12.50	168.08	0.0783	0.139423
C.coggygri	C.tinctori	9.50	59.83	0.1784	5.50	165.17	0.0341	0.191143
C.coggygri	S.miltiorr	28.50	56.92	0.8262	8.50	168.08	0.0524	0.0634229
C.coggygri	C.sativa_a	5.00	58.67	0.0905	2.00	166.33	0.0121	0.133702
C.coggygri	G.max_atp9	22.50	57.42	0.5544	9.50	167.58	0.0589	0.106241
C.coggygri	D.hancocki	8.00	58.83	0.15	2.00	166.17	0.0121	0.0806667
C.coggygri	D.officina	8.00	58.83	0.15	2.00	166.17	0.0121	0.0806667
C.coggygri	D.huoshane	8.00	58.83	0.15	2.00	166.17	0.0121	0.0806667
O.fragrans	C.quinoa_a	15.00	57.00	0.3241	7.00	168	0.0429	0.132367
O.fragrans	C.japonica	7.50	58.08	0.1417	6.50	166.92	0.04	0.282287
O.fragrans	B.juncea_a	10.50	57.00	0.2114	7.50	168	0.046	0.217597
O.fragrans	B.umbellat	32.50	56.33	1.0998	8.50	168.67	0.0522	0.0474632
O.fragrans	F.hygromet	27.00	56.50	0.7604	6.00	168.5	0.0365	0.0480011
O.fragrans	C.tinctori	11.00	59.42	0.2126	7.00	165.58	0.0435	0.20461
O.fragrans	S.miltiorr	26.00	56.50	0.7131	5.00	168.5	0.0303	0.0424905
O.fragrans	C.sativa_a	9.50	58.25	0.1839	9.50	166.75	0.0593	0.322458
O.fragrans	G.max_atp9	21.00	57.00	0.5068	5.00	168	0.0304	0.0599842
O.fragrans	D.hancocki	15.50	58.42	0.3275	9.50	166.58	0.0593	0.181069
O.fragrans	D.officina	15.50	58.42	0.3275	9.50	166.58	0.0593	0.181069
O.fragrans	D.huoshane	15.50	58.42	0.3275	9.50	166.58	0.0593	0.181069
C.quinoa_a	C.japonica	12.50	57.25	0.2581	7.50	167.75	0.0461	0.178613
C.quinoa_a	B.juncea_a	10.50	56.17	0.215	6.50	168.83	0.0395	0.183721
C.quinoa_a	B.umbellat	34.50	55.50	1.3238	8.50	169.5	0.0519	0.0392053
C.quinoa_a	F.hygromet	28.00	55.67	0.833	6.00	169.33	0.0363	0.0435774
C.quinoa_a	C.tinctori	15.50	58.58	0.3263	7.50	166.42	0.0465	0.142507
C.quinoa_a	S.miltiorr	31.00	55.67	1.0176	4.00	169.33	0.024	0.0235849
C.quinoa_a	C.sativa_a	10.50	57.42	0.2096	4.50	167.58	0.0273	0.130248
C.quinoa_a	G.max_atp9	24.00	56.17	0.6325	7.00	168.83	0.0427	0.0675099
C.quinoa_a	D.hancocki	17.50	57.58	0.3897	6.50	167.42	0.0399	0.102386
C.quinoa_a	D.officina	17.50	57.58	0.3897	6.50	167.42	0.0399	0.102386
C.quinoa_a	D.huoshane	17.50	57.58	0.3897	6.50	167.42	0.0399	0.102386
C.japonica	B.juncea_a	6.00	57.25	0.1129	9.00	167.75	0.0557	0.493357
C.japonica	B.umbellat	27.00	56.58	0.7584	9.00	168.42	0.0554	0.0730485
C.japonica	F.hygromet	23.50	56.75	0.6024	9.50	168.25	0.0587	0.0974436
C.japonica	C.tinctori	6.50	59.67	0.1177	6.50	165.33	0.0404	0.343246
C.japonica	S.miltiorr	27.50	56.75	0.7791	7.50	168.25	0.046	0.0590425
C.japonica	C.sativa_a	6.00	58.50	0.1103	7.00	166.5	0.0433	0.392566
C.japonica	G.max_atp9	24.50	57.25	0.634	10.50	167.75	0.0654	0.103155
C.japonica	D.hancocki	11.00	58.67	0.2158	5.00	166.33	0.0307	0.142261
C.japonica	D.officina	11.00	58.67	0.2158	5.00	166.33	0.0307	0.142261
C.japonica	D.huoshane	11.00	58.67	0.2158	5.00	166.33	0.0307	0.142261
B.juncea_a	B.umbellat	29.00	55.50	0.8948	7.00	169.5	0.0425	0.0474966
B.juncea_a	F.hygromet	24.50	55.67	0.6629	5.50	169.33	0.0332	0.050083
B.juncea_a	C.tinctori	8.50	58.58	0.1612	7.50	166.42	0.0465	0.288462
B.juncea_a	S.miltiorr	27.50	55.67	0.8062	6.50	169.33	0.0394	0.0488712
B.juncea_a	C.sativa_a	4.00	57.42	0.0731	6.00	167.58	0.0367	0.502052
B.juncea_a	G.max_atp9	24.50	56.17	0.6535	4.50	168.83	0.0271	0.041469
B.juncea_a	D.hancocki	10.00	57.58	0.1975	6.00	167.42	0.0367	0.185823
B.juncea_a	D.officina	10.00	57.58	0.1975	6.00	167.42	0.0367	0.185823
B.juncea_a	D.huoshane	10.00	57.58	0.1975	6.00	167.42	0.0367	0.185823
B.umbellat	F.hygromet	36.50	55.00	1.6211	7.50	170	0.0455	0.0280674
B.umbellat	C.tinctori	30.00	57.92	0.88	11.00	167.08	0.0689	0.0782955
B.umbellat	S.miltiorr	39.50	55.00	2.37	3.50	170	0.0209	0.00881857
B.umbellat	C.sativa_a	28.00	56.75	0.8044	10.00	168.25	0.0619	0.0769518
B.umbellat	G.max_atp9	36.50	55.50	1.5709	7.50	169.5	0.0456	0.0290279
B.umbellat	D.hancocki	27.00	56.92	0.7508	10.00	168.08	0.062	0.0825786
B.umbellat	D.officina	27.00	56.92	0.7508	10.00	168.08	0.062	0.0825786
B.umbellat	D.huoshane	27.00	56.92	0.7508	10.00	168.08	0.062	0.0825786
F.hygromet	C.tinctori	25.50	58.08	0.6603	9.50	166.92	0.0592	0.0896562
F.hygromet	S.miltiorr	40.00	55.17	2.5532	4.00	169.83	0.0239	0.0093608
F.hygromet	C.sativa_a	24.50	56.92	0.6399	10.50	168.08	0.0652	0.101891
F.hygromet	G.max_atp9	36.00	55.67	1.4869	5.00	169.33	0.0301	0.0202435
F.hygromet	D.hancocki	22.50	57.08	0.5592	13.50	167.92	0.085	0.152003
F.hygromet	D.officina	22.50	57.08	0.5592	13.50	167.92	0.085	0.152003
F.hygromet	D.huoshane	22.50	57.08	0.5592	13.50	167.92	0.085	0.152003
C.tinctori	S.miltiorr	31.50	58.08	0.9631	9.50	166.92	0.0592	0.0614682
C.tinctori	C.sativa_a	7.00	59.83	0.1272	3.00	165.17	0.0184	0.144654
C.tinctori	G.max_atp9	26.00	58.58	0.6719	13.00	166.42	0.0825	0.122786
C.tinctori	D.hancocki	12.50	60.00	0.2441	7.50	165	0.0469	0.192134
C.tinctori	D.officina	12.50	60.00	0.2441	7.50	165	0.0469	0.192134
C.tinctori	D.huoshane	12.50	60.00	0.2441	7.50	165	0.0469	0.192134
S.miltiorr	C.sativa_a	28.50	56.92	0.8262	8.50	168.08	0.0524	0.0634229
S.miltiorr	G.max_atp9	32.00	55.67	1.0908	4.00	169.33	0.024	0.0220022
S.miltiorr	D.hancocki	29.50	57.08	0.8761	8.50	167.92	0.0524	0.0598105
S.miltiorr	D.officina	29.50	57.08	0.8761	8.50	167.92	0.0524	0.0598105
S.miltiorr	D.huoshane	29.50	57.08	0.8761	8.50	167.92	0.0524	0.0598105
C.sativa_a	G.max_atp9	21.50	57.42	0.5188	11.50	167.58	0.072	0.138782
C.sativa_a	D.hancocki	8.00	58.83	0.15	4.00	166.17	0.0245	0.163333
C.sativa_a	D.officina	8.00	58.83	0.15	4.00	166.17	0.0245	0.163333
C.sativa_a	D.huoshane	8.00	58.83	0.15	4.00	166.17	0.0245	0.163333
G.max_atp9	D.hancocki	25.50	57.58	0.6695	9.50	167.42	0.059	0.0881255
G.max_atp9	D.officina	25.50	57.58	0.6695	9.50	167.42	0.059	0.0881255
G.max_atp9	D.huoshane	25.50	57.58	0.6695	9.50	167.42	0.059	0.0881255
D.hancocki	D.officina	0.00	59.00	0	0.00	166	0	#DIV/0!
D.hancocki	D.huoshane	0.00	59.00	0	0.00	166	0	#DIV/0!
D.officina	D.huoshane	0.00	59.00	0	0.00	166	0	#DIV/0!

## Sheet: ccmb
Seq 1	Seq 2	SynDif	SynPos	Ks	NSynDif	NSynPos	Ka	Ka/Ks
G.elata_cc	A.thaliana	10.00	128	0.0825	20.00	388	0.0534	0.647273
G.elata_cc	Z.mays_ccm	11.50	128.33	0.0954	23.50	387.67	0.0632	0.662474
G.elata_cc	G.biloba_c	14.50	127.17	0.1237	43.50	388.83	0.1212	0.97979
G.elata_cc	F.gracilis	7.50	127	0.0615	21.50	389	0.0574	0.933333
G.elata_cc	C.sinensis	7.50	127.83	0.0611	22.50	388.17	0.0603	0.986907
G.elata_cc	C.taitunge	13.00	126.92	0.1101	38.00	389.08	0.1046	0.950045
G.elata_cc	P.nudum_cc	52.50	121.92	0.6403	99.50	394.08	0.3078	0.480712
G.elata_cc	O.sativa_c	11.50	128.17	0.0956	23.50	387.83	0.0632	0.661088
G.elata_cc	A.officina	7.00	127.42	0.0571	20.00	388.58	0.0533	0.93345
G.elata_cc	M.baccata_	7.50	126.92	0.0616	18.50	389.08	0.0491	0.797078
G.elata_cc	V.vinifera	10.75	126.08	0.0905	44.25	389.92	0.123	1.35912
G.elata_cc	C.coggygri	7.50	127.83	0.0611	21.50	388.17	0.0575	0.94108
G.elata_cc	O.fragrans	9.00	128.25	0.0737	21.00	387.75	0.0562	0.762551
G.elata_cc	C.quinoa_c	10.00	126.33	0.0837	27.00	389.67	0.0727	0.868578
G.elata_cc	C.japonica	10.50	127.75	0.0871	22.50	388.25	0.0603	0.692308
G.elata_cc	B.juncea_c	9.00	128	0.0738	20.00	388	0.0534	0.723577
G.elata_cc	B.umbellat	9.50	127.33	0.0786	19.50	388.67	0.0519	0.660305
G.elata_cc	F.hygromet	50.42	119.83	0.6174	91.58	396.17	0.2764	0.447684
G.elata_cc	C.tinctori	13.00	128.42	0.1087	23.00	387.58	0.0618	0.568537
G.elata_cc	S.miltiorr	11.00	127.58	0.0916	22.00	388.42	0.0589	0.643013
G.elata_cc	C.sativa_c	8.00	128.17	0.0652	24.00	387.83	0.0646	0.990798
G.elata_cc	G.max_ccmB	10.00	127.25	0.083	21.00	388.75	0.0561	0.675904
G.elata_cc	D.hancocki	3.00	126.75	0.0241	12.00	389.25	0.0315	1.30705
G.elata_cc	D.officina	3.00	126.75	0.0241	12.00	389.25	0.0315	1.30705
G.elata_cc	D.huoshane	3.00	126.75	0.0241	12.00	389.25	0.0315	1.30705
A.thaliana	Z.mays_ccm	11.00	129.67	0.09	20.00	386.33	0.0536	0.595556
A.thaliana	G.biloba_c	14.00	128.5	0.1177	44.00	387.5	0.1231	1.04588
A.thaliana	F.gracilis	3.50	128.33	0.0278	13.50	387.67	0.0357	1.28417
A.thaliana	C.sinensis	3.50	129.17	0.0276	8.50	386.83	0.0223	0.807971
A.thaliana	C.taitunge	10.50	128.25	0.0867	37.50	387.75	0.1035	1.19377
A.thaliana	P.nudum_cc	49.67	123.25	0.578	91.33	392.75	0.2784	0.481661
A.thaliana	O.sativa_c	11.00	129.5	0.0901	20.00	386.5	0.0536	0.594895
A.thaliana	A.officina	6.00	128.75	0.0481	18.00	387.25	0.048	0.997921
A.thaliana	M.baccata_	3.00	128.25	0.0238	13.00	387.75	0.0343	1.44118
A.thaliana	V.vinifera	7.08	127.42	0.0578	34.92	388.58	0.0957	1.65571
A.thaliana	C.coggygri	3.50	129.17	0.0276	7.50	386.83	0.0196	0.710145
A.thaliana	O.fragrans	5.00	129.58	0.0396	11.00	386.42	0.029	0.732323
A.thaliana	C.quinoa_c	7.00	127.67	0.0569	18.00	388.33	0.0478	0.84007
A.thaliana	C.japonica	6.50	129.08	0.0521	12.50	386.92	0.033	0.633397
A.thaliana	B.juncea_c	1.00	129.33	0.0078	0.00	386.67	0	0
A.thaliana	B.umbellat	9.50	128.67	0.0777	21.50	387.33	0.0577	0.7426
A.thaliana	F.hygromet	45.92	121.17	0.5278	87.08	394.83	0.2612	0.494884
A.thaliana	C.tinctori	7.00	129.75	0.056	13.00	386.25	0.0344	0.614286
A.thaliana	S.miltiorr	5.00	128.92	0.0398	12.00	387.08	0.0317	0.796482
A.thaliana	C.sativa_c	2.00	129.5	0.0156	14.00	386.5	0.0371	2.37821
A.thaliana	G.max_ccmB	6.00	128.58	0.0482	13.00	387.42	0.0343	0.711618
A.thaliana	D.hancocki	9.00	128.08	0.0738	18.00	387.92	0.0479	0.649051
A.thaliana	D.officina	9.00	128.08	0.0738	18.00	387.92	0.0479	0.649051
A.thaliana	D.huoshane	9.00	128.08	0.0738	18.00	387.92	0.0479	0.649051
Z.mays_ccm	G.biloba_c	15.50	128.83	0.1311	42.50	387.17	0.1187	0.905416
Z.mays_ccm	F.gracilis	8.00	128.67	0.0649	22.00	387.33	0.0591	0.910632
Z.mays_ccm	C.sinensis	8.00	129.5	0.0645	21.00	386.5	0.0564	0.874419
Z.mays_ccm	C.taitunge	11.50	128.58	0.0952	38.50	387.42	0.1066	1.11975
Z.mays_ccm	P.nudum_cc	50.67	123.58	0.5933	89.33	392.42	0.2713	0.457273
Z.mays_ccm	O.sativa_c	0.00	129.83	0	4.00	386.17	0.0104	#DIV/0!
Z.mays_ccm	A.officina	5.00	129.08	0.0398	18.00	386.92	0.048	1.20603
Z.mays_ccm	M.baccata_	8.00	128.58	0.0649	19.00	387.42	0.0507	0.781202
Z.mays_ccm	V.vinifera	11.75	127.75	0.0981	45.25	388.25	0.1267	1.29154
Z.mays_ccm	C.coggygri	8.00	129.5	0.0645	20.00	386.5	0.0536	0.831008
Z.mays_ccm	O.fragrans	8.00	129.92	0.0643	19.00	386.08	0.0509	0.791602
Z.mays_ccm	C.quinoa_c	10.50	128	0.0869	25.50	388	0.0688	0.791715
Z.mays_ccm	C.japonica	9.50	129.42	0.0773	22.50	386.58	0.0606	0.783959
Z.mays_ccm	B.juncea_c	10.00	129.67	0.0814	20.00	386.33	0.0536	0.658477
Z.mays_ccm	B.umbellat	11.50	129	0.0949	22.50	387	0.0605	0.637513
Z.mays_ccm	F.hygromet	45.42	121.5	0.5175	85.58	394.5	0.2561	0.494879
Z.mays_ccm	C.tinctori	12.00	130.08	0.0984	22.00	385.92	0.0593	0.602642
Z.mays_ccm	S.miltiorr	10.00	129.25	0.0817	22.00	386.75	0.0592	0.724602
Z.mays_ccm	C.sativa_c	9.50	129.83	0.077	22.50	386.17	0.0607	0.788312
Z.mays_ccm	G.max_ccmB	11.50	128.92	0.095	24.50	387.08	0.0661	0.695789
Z.mays_ccm	D.hancocki	10.50	128.42	0.0866	17.50	387.58	0.0466	0.538106
Z.mays_ccm	D.officina	10.50	128.42	0.0866	17.50	387.58	0.0466	0.538106
Z.mays_ccm	D.huoshane	10.50	128.42	0.0866	17.50	387.58	0.0466	0.538106
G.biloba_c	F.gracilis	12.00	127.5	0.1006	46.00	388.5	0.1289	1.28131
G.biloba_c	C.sinensis	12.00	128.33	0.0999	43.00	387.67	0.12	1.2012
G.biloba_c	C.taitunge	6.50	127.42	0.0528	23.50	388.58	0.0631	1.19508
G.biloba_c	P.nudum_cc	54.17	122.42	0.6686	94.83	393.58	0.2906	0.43464
G.biloba_c	O.sativa_c	15.50	128.67	0.1313	40.50	387.33	0.1126	0.857578
G.biloba_c	A.officina	13.00	127.92	0.1092	39.00	388.08	0.1079	0.988095
G.biloba_c	M.baccata_	12.00	127.42	0.1006	45.00	388.58	0.1258	1.2505
G.biloba_c	V.vinifera	16.08	126.58	0.1392	62.92	389.42	0.182	1.30747
G.biloba_c	C.coggygri	12.00	128.33	0.0999	42.00	387.67	0.117	1.17117
G.biloba_c	O.fragrans	12.50	128.75	0.104	42.50	387.25	0.1187	1.14135
G.biloba_c	C.quinoa_c	15.00	126.83	0.1287	51.00	389.17	0.144	1.11888
G.biloba_c	C.japonica	13.50	128.25	0.1134	44.50	387.75	0.1246	1.09877
G.biloba_c	B.juncea_c	13.00	128.5	0.1087	44.00	387.5	0.1231	1.13247
G.biloba_c	B.umbellat	17.00	127.83	0.1464	41.00	388.17	0.1138	0.777322
G.biloba_c	F.hygromet	42.42	120.33	0.4761	92.58	395.67	0.2805	0.589162
G.biloba_c	C.tinctori	16.00	128.92	0.1357	43.00	387.08	0.1202	0.885777
G.biloba_c	S.miltiorr	14.50	128.08	0.1227	43.50	387.92	0.1215	0.99022
G.biloba_c	C.sativa_c	13.50	128.67	0.113	49.50	387.33	0.1401	1.23982
G.biloba_c	G.max_ccmB	14.00	127.75	0.1185	43.00	388.25	0.1198	1.01097
G.biloba_c	D.hancocki	15.50	127.25	0.1329	39.50	388.75	0.1092	0.82167
G.biloba_c	D.officina	15.50	127.25	0.1329	39.50	388.75	0.1092	0.82167
G.biloba_c	D.huoshane	15.50	127.25	0.1329	39.50	388.75	0.1092	0.82167
F.gracilis	C.sinensis	0.00	128.17	0	11.00	387.83	0.0289	#DIV/0!
F.gracilis	C.taitunge	8.50	127.25	0.07	39.50	388.75	0.1092	1.56
F.gracilis	P.nudum_cc	48.17	122.25	0.5589	91.83	393.75	0.2794	0.499911
F.gracilis	O.sativa_c	8.00	128.5	0.065	19.00	387.5	0.0507	0.78
F.gracilis	A.officina	3.00	127.75	0.0239	20.00	388.25	0.0534	2.23431
F.gracilis	M.baccata_	0.00	127.25	0	5.00	388.75	0.013	#DIV/0!
F.gracilis	V.vinifera	3.75	126.42	0.0303	39.25	389.58	0.1082	3.57096
F.gracilis	C.coggygri	0.00	128.17	0	10.00	387.83	0.0262	#DIV/0!
F.gracilis	O.fragrans	2.00	128.58	0.0157	15.00	387.42	0.0398	2.53503
F.gracilis	C.quinoa_c	2.50	126.67	0.02	17.50	389.33	0.0464	2.32
F.gracilis	C.japonica	3.50	128.08	0.0278	16.50	387.92	0.0438	1.57554
F.gracilis	B.juncea_c	2.50	128.33	0.0197	13.50	387.67	0.0357	1.81218
F.gracilis	B.umbellat	8.50	127.67	0.0697	19.50	388.33	0.052	0.746055
F.gracilis	F.hygromet	43.42	120.17	0.493	90.58	395.83	0.273	0.553753
F.gracilis	C.tinctori	6.00	128.75	0.0481	17.00	387.25	0.0452	0.939709
F.gracilis	S.miltiorr	4.00	127.92	0.0319	16.00	388.08	0.0424	1.32915
F.gracilis	C.sativa_c	2.00	128.5	0.0157	13.00	387.5	0.0343	2.18471
F.gracilis	G.max_ccmB	3.00	127.58	0.0239	15.00	388.42	0.0396	1.6569
F.gracilis	D.hancocki	6.50	127.08	0.053	21.50	388.92	0.0574	1.08302
F.gracilis	D.officina	6.50	127.08	0.053	21.50	388.92	0.0574	1.08302
F.gracilis	D.huoshane	6.50	127.08	0.053	21.50	388.92	0.0574	1.08302
C.sinensis	C.taitunge	8.50	128.08	0.0695	40.50	387.92	0.1124	1.61727
C.sinensis	P.nudum_cc	48.17	123.08	0.5533	96.83	392.92	0.2988	0.540033
C.sinensis	O.sativa_c	8.00	129.33	0.0646	21.00	386.67	0.0564	0.873065
C.sinensis	A.officina	3.00	128.58	0.0237	17.00	387.42	0.0452	1.90717
C.sinensis	M.baccata_	0.00	128.08	0	12.00	387.92	0.0316	#DIV/0!
C.sinensis	V.vinifera	3.58	127.25	0.0287	35.42	388.75	0.0971	3.38328
C.sinensis	C.coggygri	0.00	129	0	3.00	387	0.0078	#DIV/0!
C.sinensis	O.fragrans	2.00	129.42	0.0156	8.00	386.58	0.021	1.34615
C.sinensis	C.quinoa_c	2.50	127.5	0.0199	18.50	388.5	0.0492	2.47236
C.sinensis	C.japonica	3.50	128.92	0.0277	11.50	387.08	0.0303	1.09386
C.sinensis	B.juncea_c	2.50	129.17	0.0196	8.50	386.83	0.0223	1.13776
C.sinensis	B.umbellat	8.50	128.5	0.0692	16.50	387.5	0.0438	0.632948
C.sinensis	F.hygromet	43.92	121	0.4961	90.08	395	0.2719	0.548075
C.sinensis	C.tinctori	6.00	129.58	0.0478	10.00	386.42	0.0263	0.550209
C.sinensis	S.miltiorr	4.00	128.75	0.0317	9.00	387.25	0.0236	0.744479
C.sinensis	C.sativa_c	2.00	129.33	0.0156	12.00	386.67	0.0317	2.03205
C.sinensis	G.max_ccmB	3.00	128.42	0.0237	12.00	387.58	0.0316	1.33333
C.sinensis	D.hancocki	6.50	127.92	0.0526	18.50	388.08	0.0493	0.937262
C.sinensis	D.officina	6.50	127.92	0.0526	18.50	388.08	0.0493	0.937262
C.sinensis	D.huoshane	6.50	127.92	0.0526	18.50	388.08	0.0493	0.937262
C.taitunge	P.nudum_cc	52.67	122.17	0.6414	92.33	393.83	0.2811	0.43826
C.taitunge	O.sativa_c	11.50	128.42	0.0954	36.50	387.58	0.1006	1.05451
C.taitunge	A.officina	9.50	127.67	0.0784	35.50	388.33	0.0975	1.24362
C.taitunge	M.baccata_	8.50	127.17	0.07	40.50	388.83	0.1121	1.60143
C.taitunge	V.vinifera	12.58	126.33	0.1069	58.42	389.67	0.1673	1.56501
C.taitunge	C.coggygri	8.50	128.08	0.0695	39.50	387.92	0.1094	1.5741
C.taitunge	O.fragrans	8.50	128.5	0.0692	40.50	387.5	0.1126	1.62717
C.taitunge	C.quinoa_c	11.50	126.58	0.0968	46.50	389.42	0.1301	1.34401
C.taitunge	C.japonica	10.00	128	0.0825	42.00	388	0.1169	1.41697
C.taitunge	B.juncea_c	9.50	128.25	0.078	37.50	387.75	0.1035	1.32692
C.taitunge	B.umbellat	14.50	127.58	0.1232	36.50	388.42	0.1004	0.814935
C.taitunge	F.hygromet	43.92	120.08	0.5015	90.08	395.92	0.2711	0.540578
C.taitunge	C.tinctori	12.50	128.67	0.104	40.50	387.33	0.1126	1.08269
C.taitunge	S.miltiorr	11.00	127.83	0.0914	41.00	388.17	0.1138	1.24508
C.taitunge	C.sativa_c	9.50	128.42	0.0779	45.50	387.58	0.1277	1.63928
C.taitunge	G.max_ccmB	10.50	127.5	0.0872	40.50	388.5	0.1122	1.2867
C.taitunge	D.hancocki	11.50	127	0.0965	36.50	389	0.1002	1.03834
C.taitunge	D.officina	11.50	127	0.0965	36.50	389	0.1002	1.03834
C.taitunge	D.huoshane	11.50	127	0.0965	36.50	389	0.1002	1.03834
P.nudum_cc	O.sativa_c	50.67	123.42	0.5945	88.33	392.58	0.2675	0.449958
P.nudum_cc	A.officina	49.00	122.67	0.5704	94.00	393.33	0.2878	0.504558
P.nudum_cc	M.baccata_	47.67	122.17	0.5508	91.33	393.83	0.2774	0.503631
P.nudum_cc	V.vinifera	49.42	121.33	0.5874	112.58	394.67	0.3589	0.610998
P.nudum_cc	C.coggygri	48.17	123.08	0.5533	95.83	392.92	0.295	0.533165
P.nudum_cc	O.fragrans	48.17	123.5	0.5505	97.83	392.5	0.303	0.550409
P.nudum_cc	C.quinoa_c	48.17	121.58	0.5634	85.83	394.42	0.257	0.456159
P.nudum_cc	C.japonica	49.17	123	0.571	99.83	393	0.3102	0.543257
P.nudum_cc	B.juncea_c	50.67	123.25	0.5958	91.33	392.75	0.2784	0.467271
P.nudum_cc	B.umbellat	51.00	122.58	0.6068	99.00	393.42	0.3066	0.505274
P.nudum_cc	F.hygromet	44.50	115.08	0.5436	49.50	400.92	0.1349	0.24816
P.nudum_cc	C.tinctori	51.17	123.67	0.6017	99.83	392.33	0.3108	0.516536
P.nudum_cc	S.miltiorr	49.67	122.83	0.581	99.33	393.17	0.3081	0.530293
P.nudum_cc	C.sativa_c	48.67	123.42	0.5595	97.33	392.58	0.301	0.53798
P.nudum_cc	G.max_ccmB	50.67	122.5	0.6013	95.33	393.5	0.2926	0.486612
P.nudum_cc	D.hancocki	51.67	122	0.6237	93.33	394	0.2847	0.456469
P.nudum_cc	D.officina	51.67	122	0.6237	93.33	394	0.2847	0.456469
P.nudum_cc	D.huoshane	51.67	122	0.6237	93.33	394	0.2847	0.456469
O.sativa_c	A.officina	5.00	128.92	0.0398	18.00	387.08	0.048	1.20603
O.sativa_c	M.baccata_	8.00	128.42	0.065	17.00	387.58	0.0452	0.695385
O.sativa_c	V.vinifera	11.75	127.58	0.0983	45.25	388.42	0.1266	1.28789
O.sativa_c	C.coggygri	8.00	129.33	0.0646	20.00	386.67	0.0536	0.829721
O.sativa_c	O.fragrans	8.00	129.75	0.0643	19.00	386.25	0.0509	0.791602
O.sativa_c	C.quinoa_c	10.50	127.83	0.087	24.50	388.17	0.0659	0.757471
O.sativa_c	C.japonica	9.50	129.25	0.0774	22.50	386.75	0.0606	0.782946
O.sativa_c	B.juncea_c	10.00	129.5	0.0815	20.00	386.5	0.0536	0.657669
O.sativa_c	B.umbellat	11.50	128.83	0.095	22.50	387.17	0.0605	0.636842
O.sativa_c	F.hygromet	45.42	121.33	0.5185	86.58	394.67	0.2595	0.500482
O.sativa_c	C.tinctori	12.00	129.92	0.0986	22.00	386.08	0.0593	0.60142
O.sativa_c	S.miltiorr	10.00	129.08	0.0818	22.00	386.92	0.0591	0.722494
O.sativa_c	C.sativa_c	9.50	129.67	0.0771	22.50	386.33	0.0606	0.785992
O.sativa_c	G.max_ccmB	11.50	128.75	0.0951	24.50	387.25	0.0661	0.695058
O.sativa_c	D.hancocki	10.50	128.25	0.0867	17.50	387.75	0.0465	0.536332
O.sativa_c	D.officina	10.50	128.25	0.0867	17.50	387.75	0.0465	0.536332
O.sativa_c	D.huoshane	10.50	128.25	0.0867	17.50	387.75	0.0465	0.536332
A.officina	M.baccata_	3.00	127.67	0.0239	19.00	388.33	0.0506	2.11715
A.officina	V.vinifera	7.08	126.83	0.058	43.92	389.17	0.1223	2.10862
A.officina	C.coggygri	3.00	128.58	0.0237	16.00	387.42	0.0425	1.79325
A.officina	O.fragrans	5.00	129	0.0398	13.00	387	0.0344	0.864322
A.officina	C.quinoa_c	5.50	127.08	0.0446	25.50	388.92	0.0686	1.53812
A.officina	C.japonica	6.50	128.5	0.0524	14.50	387.5	0.0384	0.732824
A.officina	B.juncea_c	5.00	128.75	0.0399	18.00	387.25	0.048	1.20301
A.officina	B.umbellat	8.50	128.08	0.0695	10.50	387.92	0.0276	0.397122
A.officina	F.hygromet	44.92	120.58	0.5149	91.08	395.42	0.2752	0.534473
A.officina	C.tinctori	9.00	129.17	0.0731	14.00	386.83	0.0371	0.507524
A.officina	S.miltiorr	7.00	128.33	0.0566	14.00	387.67	0.037	0.65371
A.officina	C.sativa_c	4.50	128.92	0.0357	23.50	387.08	0.0633	1.77311
A.officina	G.max_ccmB	6.00	128	0.0484	21.00	388	0.0562	1.16116
A.officina	D.hancocki	5.00	127.5	0.0403	12.00	388.5	0.0315	0.781638
A.officina	D.officina	5.00	127.5	0.0403	12.00	388.5	0.0315	0.781638
A.officina	D.huoshane	5.00	127.5	0.0403	12.00	388.5	0.0315	0.781638
M.baccata_	V.vinifera	3.75	126.33	0.0303	40.25	389.67	0.1111	3.66667
M.baccata_	C.coggygri	0.00	128.08	0	11.00	387.92	0.0289	#DIV/0!
M.baccata_	O.fragrans	2.00	128.5	0.0157	14.00	387.5	0.037	2.35669
M.baccata_	C.quinoa_c	2.50	126.58	0.02	20.50	389.42	0.0546	2.73
M.baccata_	C.japonica	3.50	128	0.0279	15.50	388	0.0411	1.47312
M.baccata_	B.juncea_c	2.00	128.25	0.0158	13.00	387.75	0.0343	2.17089
M.baccata_	B.umbellat	8.00	127.58	0.0655	19.00	388.42	0.0506	0.772519
M.baccata_	F.hygromet	42.92	120.08	0.4854	90.08	395.92	0.2711	0.558508
M.baccata_	C.tinctori	6.00	128.67	0.0481	16.00	387.33	0.0425	0.883576
M.baccata_	S.miltiorr	4.00	127.83	0.032	15.00	388.17	0.0397	1.24063
M.baccata_	C.sativa_c	1.50	128.42	0.0118	14.50	387.58	0.0384	3.25424
M.baccata_	G.max_ccmB	3.00	127.5	0.0239	14.00	388.5	0.0369	1.54393
M.baccata_	D.hancocki	6.50	127	0.053	18.50	389	0.0491	0.926415
M.baccata_	D.officina	6.50	127	0.053	18.50	389	0.0491	0.926415
M.baccata_	D.huoshane	6.50	127	0.053	18.50	389	0.0491	0.926415
V.vinifera	C.coggygri	3.58	127.25	0.0287	36.42	388.75	0.1001	3.4878
V.vinifera	O.fragrans	5.58	127.67	0.0451	35.42	388.33	0.0972	2.15521
V.vinifera	C.quinoa_c	6.25	125.75	0.0514	40.75	390.25	0.1124	2.18677
V.vinifera	C.japonica	7.08	127.17	0.0579	38.92	388.83	0.1074	1.85492
V.vinifera	B.juncea_c	6.08	127.42	0.0493	34.92	388.58	0.0957	1.94118
V.vinifera	B.umbellat	12.58	126.75	0.1065	43.42	389.25	0.1208	1.13427
V.vinifera	F.hygromet	44.17	119.25	0.5107	107.83	396.75	0.3375	0.660858
V.vinifera	C.tinctori	9.58	127.83	0.079	37.42	388.17	0.1032	1.30633
V.vinifera	S.miltiorr	7.58	127	0.0622	36.42	389	0.1	1.60772
V.vinifera	C.sativa_c	5.25	127.58	0.0423	40.75	388.42	0.113	2.67139
V.vinifera	G.max_ccmB	6.08	126.67	0.0496	40.92	389.33	0.1132	2.28226
V.vinifera	D.hancocki	9.58	126.17	0.0801	46.42	389.83	0.1297	1.61923
V.vinifera	D.officina	9.58	126.17	0.0801	46.42	389.83	0.1297	1.61923
V.vinifera	D.huoshane	9.58	126.17	0.0801	46.42	389.83	0.1297	1.61923
C.coggygri	O.fragrans	2.00	129.42	0.0156	9.00	386.58	0.0236	1.51282
C.coggygri	C.quinoa_c	2.50	127.5	0.0199	17.50	388.5	0.0465	2.33668
C.coggygri	C.japonica	3.50	128.92	0.0277	8.50	387.08	0.0223	0.805054
C.coggygri	B.juncea_c	2.50	129.17	0.0196	7.50	386.83	0.0196	1
C.coggygri	B.umbellat	8.50	128.5	0.0692	17.50	387.5	0.0466	0.67341
C.coggygri	F.hygromet	43.92	121	0.4961	90.08	395	0.2719	0.548075
C.coggygri	C.tinctori	6.00	129.58	0.0478	11.00	386.42	0.029	0.606695
C.coggygri	S.miltiorr	4.00	128.75	0.0317	10.00	387.25	0.0263	0.829653
C.coggygri	C.sativa_c	2.00	129.33	0.0156	13.00	386.67	0.0344	2.20513
C.coggygri	G.max_ccmB	3.00	128.42	0.0237	11.00	387.58	0.0289	1.21941
C.coggygri	D.hancocki	6.50	127.92	0.0526	17.50	388.08	0.0465	0.88403
C.coggygri	D.officina	6.50	127.92	0.0526	17.50	388.08	0.0465	0.88403
C.coggygri	D.huoshane	6.50	127.92	0.0526	17.50	388.08	0.0465	0.88403
O.fragrans	C.quinoa_c	4.50	127.92	0.036	16.50	388.08	0.0438	1.21667
O.fragrans	C.japonica	1.50	129.33	0.0117	7.50	386.67	0.0197	1.68376
O.fragrans	B.juncea_c	4.00	129.58	0.0315	11.00	386.42	0.029	0.920635
O.fragrans	B.umbellat	10.50	128.92	0.0862	16.50	387.08	0.0439	0.509281
O.fragrans	F.hygromet	43.92	121.42	0.4937	93.08	394.58	0.2832	0.573628
O.fragrans	C.tinctori	4.00	130	0.0314	6.00	386	0.0157	0.5
O.fragrans	S.miltiorr	2.00	129.17	0.0156	5.00	386.83	0.013	0.833333
O.fragrans	C.sativa_c	3.50	129.75	0.0275	12.50	386.25	0.0331	1.20364
O.fragrans	G.max_ccmB	5.50	128.83	0.044	13.50	387.17	0.0357	0.811364
O.fragrans	D.hancocki	8.00	128.33	0.0651	15.00	387.67	0.0397	0.609831
O.fragrans	D.officina	8.00	128.33	0.0651	15.00	387.67	0.0397	0.609831
O.fragrans	D.huoshane	8.00	128.33	0.0651	15.00	387.67	0.0397	0.609831
C.quinoa_c	C.japonica	5.00	127.42	0.0403	17.00	388.58	0.0451	1.11911
C.quinoa_c	B.juncea_c	6.00	127.67	0.0485	18.00	388.33	0.0478	0.985567
C.quinoa_c	B.umbellat	11.00	127	0.092	29.00	389	0.0785	0.853261
C.quinoa_c	F.hygromet	43.42	119.5	0.4969	80.58	396.5	0.237	0.476957
C.quinoa_c	C.tinctori	8.50	128.08	0.0695	20.50	387.92	0.0548	0.788489
C.quinoa_c	S.miltiorr	6.50	127.25	0.0529	19.50	388.75	0.0519	0.981096
C.quinoa_c	C.sativa_c	4.50	127.83	0.0361	18.50	388.17	0.0492	1.36288
C.quinoa_c	G.max_ccmB	6.00	126.92	0.0488	20.00	389.08	0.0532	1.09016
C.quinoa_c	D.hancocki	9.00	126.42	0.0748	25.00	389.58	0.0671	0.897059
C.quinoa_c	D.officina	9.00	126.42	0.0748	25.00	389.58	0.0671	0.897059
C.quinoa_c	D.huoshane	9.00	126.42	0.0748	25.00	389.58	0.0671	0.897059
C.japonica	B.juncea_c	5.50	129.08	0.0439	12.50	386.92	0.033	0.751708
C.japonica	B.umbellat	11.00	128.42	0.091	20.00	387.58	0.0535	0.587912
C.japonica	F.hygromet	44.42	120.92	0.5047	96.58	395.08	0.2958	0.586091
C.japonica	C.tinctori	5.50	129.5	0.0437	9.50	386.5	0.025	0.572082
C.japonica	S.miltiorr	3.50	128.67	0.0277	8.50	387.33	0.0223	0.805054
C.japonica	C.sativa_c	5.00	129.25	0.0397	18.00	386.75	0.048	1.20907
C.japonica	G.max_ccmB	6.50	128.33	0.0524	15.50	387.67	0.0411	0.784351
C.japonica	D.hancocki	9.50	127.83	0.0783	18.50	388.17	0.0492	0.628352
C.japonica	D.officina	9.50	127.83	0.0783	18.50	388.17	0.0492	0.628352
C.japonica	D.huoshane	9.50	127.83	0.0783	18.50	388.17	0.0492	0.628352
B.juncea_c	B.umbellat	8.50	128.67	0.0692	21.50	387.33	0.0577	0.833815
B.juncea_c	F.hygromet	46.92	121.17	0.5447	87.08	394.83	0.2612	0.47953
B.juncea_c	C.tinctori	6.00	129.75	0.0477	13.00	386.25	0.0344	0.721174
B.juncea_c	S.miltiorr	4.00	128.92	0.0317	12.00	387.08	0.0317	1
B.juncea_c	C.sativa_c	3.00	129.5	0.0235	14.00	386.5	0.0371	1.57872
B.juncea_c	G.max_ccmB	5.00	128.58	0.0399	13.00	387.42	0.0343	0.859649
B.juncea_c	D.hancocki	8.00	128.08	0.0652	18.00	387.92	0.0479	0.734663
B.juncea_c	D.officina	8.00	128.08	0.0652	18.00	387.92	0.0479	0.734663
B.juncea_c	D.huoshane	8.00	128.08	0.0652	18.00	387.92	0.0479	0.734663
B.umbellat	F.hygromet	47.92	120.5	0.5666	94.08	395.5	0.2861	0.504942
B.umbellat	C.tinctori	12.50	129.08	0.1037	16.50	386.92	0.0439	0.423337
B.umbellat	S.miltiorr	10.50	128.25	0.0867	17.50	387.75	0.0465	0.536332
B.umbellat	C.sativa_c	10.00	128.83	0.0819	25.00	387.17	0.0675	0.824176
B.umbellat	G.max_ccmB	12.17	127.92	0.1017	21.83	388.08	0.0585	0.575221
B.umbellat	D.hancocki	8.00	127.42	0.0656	13.00	388.58	0.0342	0.521341
B.umbellat	D.officina	8.00	127.42	0.0656	13.00	388.58	0.0342	0.521341
B.umbellat	D.huoshane	8.00	127.42	0.0656	13.00	388.58	0.0342	0.521341
F.hygromet	C.tinctori	46.92	121.58	0.5419	95.08	394.42	0.2908	0.53663
F.hygromet	S.miltiorr	45.42	120.75	0.5221	94.58	395.25	0.2882	0.552002
F.hygromet	C.sativa_c	43.92	121.33	0.4942	89.08	394.67	0.2685	0.543302
F.hygromet	G.max_ccmB	43.92	120.42	0.4995	90.08	395.58	0.2714	0.543343
F.hygromet	D.hancocki	47.92	119.92	0.5707	89.08	396.08	0.2674	0.468547
F.hygromet	D.officina	47.92	119.92	0.5707	89.08	396.08	0.2674	0.468547
F.hygromet	D.huoshane	47.92	119.92	0.5707	89.08	396.08	0.2674	0.468547
C.tinctori	S.miltiorr	1.50	129.33	0.0117	7.50	386.67	0.0197	1.68376
C.tinctori	C.sativa_c	8.00	129.92	0.0643	16.00	386.08	0.0426	0.662519
C.tinctori	G.max_ccmB	9.00	129	0.0732	16.00	387	0.0425	0.580601
C.tinctori	D.hancocki	12.00	128.5	0.0997	18.00	387.5	0.048	0.481444
C.tinctori	D.officina	12.00	128.5	0.0997	18.00	387.5	0.048	0.481444
C.tinctori	D.huoshane	12.00	128.5	0.0997	18.00	387.5	0.048	0.481444
S.miltiorr	C.sativa_c	5.50	129.08	0.0439	15.50	386.92	0.0412	0.938497
S.miltiorr	G.max_ccmB	7.00	128.17	0.0567	15.00	387.83	0.0397	0.700176
S.miltiorr	D.hancocki	10.00	127.67	0.0827	18.00	388.33	0.0478	0.577993
S.miltiorr	D.officina	10.00	127.67	0.0827	18.00	388.33	0.0478	0.577993
S.miltiorr	D.huoshane	10.00	127.67	0.0827	18.00	388.33	0.0478	0.577993
C.sativa_c	G.max_ccmB	5.00	128.75	0.0399	18.00	387.25	0.048	1.20301
C.sativa_c	D.hancocki	7.00	128.25	0.0567	22.00	387.75	0.059	1.04056
C.sativa_c	D.officina	7.00	128.25	0.0567	22.00	387.75	0.059	1.04056
C.sativa_c	D.huoshane	7.00	128.25	0.0567	22.00	387.75	0.059	1.04056
G.max_ccmB	D.hancocki	8.50	127.33	0.0699	22.50	388.67	0.0602	0.86123
G.max_ccmB	D.officina	8.50	127.33	0.0699	22.50	388.67	0.0602	0.86123
G.max_ccmB	D.huoshane	8.50	127.33	0.0699	22.50	388.67	0.0602	0.86123
D.hancocki	D.officina	0.00	126.83	0	0.00	389.17	0	#DIV/0!
D.hancocki	D.huoshane	0.00	126.83	0	0.00	389.17	0	#DIV/0!
D.officina	D.huoshane	0.00	126.83	0	0.00	389.17	0	#DIV/0!

## Sheet: ccmc
Seq 1	Seq 2	SynDif	SynPos	Ks	NSynDif	NSynPos	Ka	Ka/Ks
G.elata_cc	A.thaliana	20.00	162.42	0.1345	25.00	482.58	0.0537	0.399257
G.elata_cc	Z.mays_ccm	12.00	163.58	0.0772	20.00	481.42	0.0427	0.553109
G.elata_cc	G.biloba_c	31.00	161.42	0.2219	52.00	483.58	0.1161	0.523209
G.elata_cc	F.gracilis	18.00	163.58	0.119	27.00	481.42	0.0583	0.489916
G.elata_cc	C.sinensis	21.00	162.25	0.1421	26.00	482.75	0.0559	0.393385
G.elata_cc	C.taitunge	29.00	161.58	0.2051	49.00	483.42	0.1089	0.530961
G.elata_cc	P.nudum_cc	71.33	163.08	0.6564	116.67	481.92	0.2923	0.445308
G.elata_cc	O.sativa_c	15.00	163.58	0.0978	20.00	481.42	0.0427	0.436605
G.elata_cc	A.officina	9.00	164	0.057	21.00	481	0.045	0.789474
G.elata_cc	M.baccata_	16.00	163.75	0.1047	23.00	481.25	0.0494	0.471824
G.elata_cc	V.vinifera	14.50	164.08	0.094	27.50	480.92	0.0595	0.632979
G.elata_cc	C.coggygri	17.00	163.08	0.1122	27.00	481.92	0.0582	0.518717
G.elata_cc	O.fragrans	17.00	163.75	0.1117	23.00	481.25	0.0494	0.442256
G.elata_cc	C.quinoa_c	25.50	159.67	0.1796	31.50	485.33	0.0679	0.378062
G.elata_cc	C.japonica	19.00	162.67	0.127	28.00	482.33	0.0604	0.475591
G.elata_cc	B.juncea_c	20.00	162.42	0.1345	25.00	482.58	0.0537	0.399257
G.elata_cc	B.umbellat	23.00	163.25	0.1561	36.00	481.75	0.0787	0.504164
G.elata_cc	F.hygromet	60.25	153.25	0.5571	100.75	491.75	0.2393	0.429546
G.elata_cc	C.tinctori	16.50	162.92	0.1088	27.50	482.08	0.0593	0.545037
G.elata_cc	S.miltiorr	17.50	162.92	0.1159	24.50	482.08	0.0526	0.45384
G.elata_cc	C.sativa_c	17.00	163.42	0.112	27.00	481.58	0.0583	0.520536
G.elata_cc	G.max_ccmC	20.50	164.08	0.1367	25.50	480.92	0.055	0.402341
G.elata_cc	D.hancocki	5.00	163.67	0.0312	10.00	481.33	0.0211	0.676282
G.elata_cc	D.officina	6.00	163.67	0.0376	10.00	481.33	0.0211	0.56117
G.elata_cc	D.huoshane	7.00	163.67	0.044	10.00	481.33	0.0211	0.479545
A.thaliana	Z.mays_ccm	19.00	162	0.1275	19.00	483	0.0404	0.316863
A.thaliana	G.biloba_c	31.50	159.83	0.2286	48.50	485.17	0.1073	0.469379
A.thaliana	F.gracilis	12.00	162	0.078	9.00	483	0.0189	0.242308
A.thaliana	C.sinensis	13.00	160.67	0.0856	8.00	484.33	0.0167	0.195093
A.thaliana	C.taitunge	27.50	160	0.1952	45.50	485	0.1002	0.51332
A.thaliana	P.nudum_cc	68.00	161.5	0.6181	112	483.5	0.2771	0.448309
A.thaliana	O.sativa_c	20.00	162	0.1349	19.00	483	0.0404	0.299481
A.thaliana	A.officina	23.00	162.42	0.1569	20.00	482.58	0.0426	0.271511
A.thaliana	M.baccata_	10.00	162.17	0.0643	9.00	482.83	0.0189	0.293935
A.thaliana	V.vinifera	13.00	162.5	0.0846	15.00	482.5	0.0318	0.375887
A.thaliana	C.coggygri	11.00	161.5	0.0714	7.00	483.5	0.0146	0.204482
A.thaliana	O.fragrans	12.00	162.17	0.0779	11.00	482.83	0.0231	0.296534
A.thaliana	C.quinoa_c	19.50	158.08	0.1348	18.50	486.92	0.039	0.289318
A.thaliana	C.japonica	14.50	161.08	0.0959	17.50	483.92	0.0371	0.386861
A.thaliana	B.juncea_c	0.00	160.83	0	0.00	484.17	0	#DIV/0!
A.thaliana	B.umbellat	22.50	161.67	0.1539	41.50	483.33	0.0912	0.592593
A.thaliana	F.hygromet	55.92	151.67	0.5073	102.08	493.33	0.2421	0.477232
A.thaliana	C.tinctori	14.00	161.33	0.0922	17.00	483.67	0.036	0.390456
A.thaliana	S.miltiorr	11.50	161.33	0.0749	18.50	483.67	0.0393	0.5247
A.thaliana	C.sativa_c	11.00	161.83	0.0713	11.00	483.17	0.0231	0.323983
A.thaliana	G.max_ccmC	14.00	162.5	0.0915	11.00	482.5	0.0232	0.253552
A.thaliana	D.hancocki	23.50	162.08	0.1611	20.50	482.92	0.0437	0.27126
A.thaliana	D.officina	24.50	162.08	0.1688	20.50	482.92	0.0437	0.258886
A.thaliana	D.huoshane	25.50	162.08	0.1766	20.50	482.92	0.0437	0.247452
Z.mays_ccm	G.biloba_c	30.50	161	0.2184	40.50	484	0.0887	0.406136
Z.mays_ccm	F.gracilis	15.50	163.17	0.1016	18.50	481.83	0.0394	0.387795
Z.mays_ccm	C.sinensis	19.50	161.83	0.1314	21.50	483.17	0.0459	0.349315
Z.mays_ccm	C.taitunge	27.50	161.17	0.1936	39.50	483.83	0.0864	0.446281
Z.mays_ccm	P.nudum_cc	68.17	162.67	0.6136	110.83	482.33	0.2744	0.447197
Z.mays_ccm	O.sativa_c	3.00	163.17	0.0186	0.00	481.83	0	0
Z.mays_ccm	A.officina	10.00	163.58	0.0638	9.00	481.42	0.0189	0.296238
Z.mays_ccm	M.baccata_	13.00	163.33	0.0841	15.00	481.67	0.0318	0.378121
Z.mays_ccm	V.vinifera	14.50	163.67	0.0943	16.50	481.33	0.0351	0.372216
Z.mays_ccm	C.coggygri	14.50	162.67	0.0949	18.50	482.33	0.0394	0.415174
Z.mays_ccm	O.fragrans	14.50	163.33	0.0945	16.50	481.67	0.0351	0.371429
Z.mays_ccm	C.quinoa_c	23.50	159.25	0.1643	25.50	485.75	0.0544	0.331102
Z.mays_ccm	C.japonica	15.50	162.25	0.1022	23.50	482.75	0.0503	0.492172
Z.mays_ccm	B.juncea_c	19.00	162	0.1275	19.00	483	0.0404	0.316863
Z.mays_ccm	B.umbellat	24.50	162.83	0.1679	31.50	482.17	0.0684	0.407385
Z.mays_ccm	F.hygromet	57.58	152.83	0.5234	103.42	492.17	0.2466	0.47115
Z.mays_ccm	C.tinctori	15.50	162.5	0.102	21.50	482.5	0.0459	0.45
Z.mays_ccm	S.miltiorr	15.50	162.5	0.102	20.50	482.5	0.0437	0.428431
Z.mays_ccm	C.sativa_c	14.50	163	0.0947	18.50	482	0.0394	0.416051
Z.mays_ccm	G.max_ccmC	19.00	163.67	0.1261	19.00	481.33	0.0406	0.321967
Z.mays_ccm	D.hancocki	12.50	163.25	0.0808	11.50	481.75	0.0243	0.300743
Z.mays_ccm	D.officina	13.50	163.25	0.0876	11.50	481.75	0.0243	0.277397
Z.mays_ccm	D.huoshane	14.50	163.25	0.0945	11.50	481.75	0.0243	0.257143
G.biloba_c	F.gracilis	28.33	161	0.2006	47.67	484	0.1056	0.526421
G.biloba_c	C.sinensis	31.00	159.67	0.2247	47.00	485.33	0.1037	0.461504
G.biloba_c	C.taitunge	14.50	159	0.0972	17.50	486	0.0369	0.37963
G.biloba_c	P.nudum_cc	58.67	160.5	0.5011	102.33	484.5	0.2481	0.495111
G.biloba_c	O.sativa_c	33.50	161	0.2437	40.50	484	0.0887	0.363972
G.biloba_c	A.officina	31.67	161.42	0.2274	42.33	483.58	0.0931	0.409411
G.biloba_c	M.baccata_	26.50	161.17	0.1856	45.50	483.83	0.1005	0.541487
G.biloba_c	V.vinifera	29.17	161.5	0.2066	46.83	483.5	0.1037	0.501936
G.biloba_c	C.coggygri	26.00	160.5	0.1825	46.00	484.5	0.1015	0.556164
G.biloba_c	O.fragrans	25.50	161.17	0.1777	44.50	483.83	0.0981	0.552054
G.biloba_c	C.quinoa_c	31.50	157.08	0.2333	46.50	487.92	0.1019	0.436777
G.biloba_c	C.japonica	26.00	160.08	0.183	54.00	484.92	0.1205	0.65847
G.biloba_c	B.juncea_c	31.50	159.83	0.2286	48.50	485.17	0.1073	0.469379
G.biloba_c	B.umbellat	36.33	160.67	0.2691	64.67	484.33	0.147	0.546265
G.biloba_c	F.hygromet	54.50	150.67	0.4938	99.50	494.33	0.2344	0.474686
G.biloba_c	C.tinctori	27.00	160.33	0.1907	52.00	484.67	0.1158	0.607236
G.biloba_c	S.miltiorr	24.33	160.33	0.1696	52.67	484.67	0.1174	0.692217
G.biloba_c	C.sativa_c	26.50	160.83	0.186	49.50	484.17	0.1099	0.59086
G.biloba_c	G.max_ccmC	29.50	161.5	0.2093	47.50	483.5	0.1053	0.503106
G.biloba_c	D.hancocki	30.17	161.08	0.2155	44.83	483.92	0.0989	0.458933
G.biloba_c	D.officina	29.17	161.08	0.2072	44.83	483.92	0.0989	0.477317
G.biloba_c	D.huoshane	30.17	161.08	0.2155	44.83	483.92	0.0989	0.458933
F.gracilis	C.sinensis	10.00	161.83	0.0645	7.00	483.17	0.0146	0.226357
F.gracilis	C.taitunge	25.00	161.17	0.1738	47.00	483.83	0.104	0.598389
F.gracilis	P.nudum_cc	64.00	162.67	0.5577	110	482.33	0.2719	0.487538
F.gracilis	O.sativa_c	18.50	163.17	0.1229	18.50	481.83	0.0394	0.320586
F.gracilis	A.officina	19.00	163.58	0.1262	18.00	481.42	0.0384	0.304279
F.gracilis	M.baccata_	4.00	163.33	0.0249	4.00	481.67	0.0084	0.337349
F.gracilis	V.vinifera	9.00	163.67	0.0571	12.00	481.33	0.0254	0.444834
F.gracilis	C.coggygri	5.00	162.67	0.0314	4.00	482.33	0.0083	0.264331
F.gracilis	O.fragrans	8.00	163.33	0.0507	8.00	481.67	0.0168	0.331361
F.gracilis	C.quinoa_c	16.50	159.25	0.1115	20.50	485.75	0.0434	0.389238
F.gracilis	C.japonica	8.00	162.25	0.051	17.00	482.75	0.0361	0.707843
F.gracilis	B.juncea_c	12.00	162	0.078	9.00	483	0.0189	0.242308
F.gracilis	B.umbellat	23.50	162.83	0.1603	38.50	482.17	0.0844	0.526513
F.gracilis	F.hygromet	53.42	152.83	0.4705	101.58	492.17	0.2414	0.513071
F.gracilis	C.tinctori	9.00	162.5	0.0575	13.00	482.5	0.0274	0.476522
F.gracilis	S.miltiorr	9.50	162.5	0.0609	13.50	482.5	0.0285	0.46798
F.gracilis	C.sativa_c	5.00	163	0.0313	4.00	482	0.0083	0.265176
F.gracilis	G.max_ccmC	9.00	163.67	0.0571	10.00	481.33	0.0211	0.369527
F.gracilis	D.hancocki	20.50	163.25	0.1374	20.50	481.75	0.0438	0.318777
F.gracilis	D.officina	21.50	163.25	0.1448	20.50	481.75	0.0438	0.302486
F.gracilis	D.huoshane	22.50	163.25	0.1523	20.50	481.75	0.0438	0.28759
C.sinensis	C.taitunge	29.00	159.83	0.2077	46.00	485.17	0.1014	0.488204
C.sinensis	P.nudum_cc	65.50	161.33	0.5846	112.5	483.67	0.2784	0.476223
C.sinensis	O.sativa_c	22.50	161.83	0.1538	21.50	483.17	0.0459	0.29844
C.sinensis	A.officina	23.00	162.25	0.1571	19.00	482.75	0.0404	0.257161
C.sinensis	M.baccata_	6.00	162	0.038	9.00	483	0.0189	0.497368
C.sinensis	V.vinifera	13.00	162.33	0.0847	15.00	482.67	0.0317	0.374262
C.sinensis	C.coggygri	5.00	161.33	0.0317	3.00	483.67	0.0062	0.195584
C.sinensis	O.fragrans	9.00	162	0.0577	11.00	483	0.0231	0.400347
C.sinensis	C.quinoa_c	18.50	157.92	0.1274	15.50	487.08	0.0325	0.255102
C.sinensis	C.japonica	10.50	160.92	0.0683	15.50	484.08	0.0327	0.47877
C.sinensis	B.juncea_c	13.00	160.67	0.0856	8.00	484.33	0.0167	0.195093
C.sinensis	B.umbellat	23.50	161.5	0.1618	40.50	483.5	0.0888	0.548826
C.sinensis	F.hygromet	53.42	151.5	0.4763	99.58	493.5	0.2351	0.493596
C.sinensis	C.tinctori	11.00	161.17	0.0716	16.00	483.83	0.0338	0.472067
C.sinensis	S.miltiorr	7.50	161.17	0.048	18.50	483.83	0.0392	0.816667
C.sinensis	C.sativa_c	7.00	161.67	0.0446	9.00	483.33	0.0189	0.423767
C.sinensis	G.max_ccmC	10.00	162.33	0.0643	13.00	482.67	0.0274	0.426128
C.sinensis	D.hancocki	21.50	161.92	0.1461	23.50	483.08	0.0503	0.344285
C.sinensis	D.officina	22.50	161.92	0.1537	23.50	483.08	0.0503	0.327261
C.sinensis	D.huoshane	23.50	161.92	0.1613	23.50	483.08	0.0503	0.311841
C.taitunge	P.nudum_cc	59.67	160.67	0.5126	104.33	484.33	0.2539	0.495318
C.taitunge	O.sativa_c	28.50	161.17	0.2017	39.50	483.83	0.0864	0.428359
C.taitunge	A.officina	28.67	161.58	0.2024	43.33	483.42	0.0955	0.471838
C.taitunge	M.baccata_	24.17	161.33	0.1671	44.83	483.67	0.0989	0.591861
C.taitunge	V.vinifera	25.17	161.67	0.1745	45.83	483.33	0.1014	0.581089
C.taitunge	C.coggygri	24.00	160.67	0.1666	45.00	484.33	0.0992	0.595438
C.taitunge	O.fragrans	24.00	161.33	0.1658	43.00	483.67	0.0946	0.570567
C.taitunge	C.quinoa_c	31.50	157.25	0.233	47.50	487.75	0.1043	0.447639
C.taitunge	C.japonica	22.00	160.25	0.1516	54.00	484.75	0.1206	0.795515
C.taitunge	B.juncea_c	27.50	160	0.1952	45.50	485	0.1002	0.51332
C.taitunge	B.umbellat	31.17	160.83	0.2242	63.83	484.17	0.145	0.646744
C.taitunge	F.hygromet	55.75	150.83	0.5092	98.25	494.17	0.231	0.453653
C.taitunge	C.tinctori	25.00	160.5	0.1746	51.00	484.5	0.1134	0.649485
C.taitunge	S.miltiorr	24.00	160.5	0.1668	52.00	484.5	0.1158	0.694245
C.taitunge	C.sativa_c	24.17	161	0.1675	48.83	484	0.1084	0.647164
C.taitunge	G.max_ccmC	25.50	161.67	0.1771	46.50	483.33	0.103	0.581592
C.taitunge	D.hancocki	28.17	161.25	0.1989	43.83	483.75	0.0966	0.485671
C.taitunge	D.officina	27.17	161.25	0.1908	43.83	483.75	0.0966	0.506289
C.taitunge	D.huoshane	28.17	161.25	0.1989	43.83	483.75	0.0966	0.485671
P.nudum_cc	O.sativa_c	70.17	162.67	0.642	110.83	482.33	0.2744	0.427414
P.nudum_cc	A.officina	67.33	163.08	0.5997	111.67	481.92	0.2772	0.462231
P.nudum_cc	M.baccata_	62.67	162.83	0.5398	112.33	482.17	0.279	0.516858
P.nudum_cc	V.vinifera	68.67	163.17	0.6176	112.33	481.83	0.2792	0.452073
P.nudum_cc	C.coggygri	63.50	162.17	0.5538	111.5	482.83	0.276	0.498375
P.nudum_cc	O.fragrans	63.00	162.83	0.544	112	482.17	0.278	0.511029
P.nudum_cc	C.quinoa_c	66.00	158.75	0.6061	112	486.25	0.2752	0.45405
P.nudum_cc	C.japonica	64.17	161.75	0.5646	115.83	483.25	0.2888	0.511513
P.nudum_cc	B.juncea_c	68.00	161.5	0.6181	112	483.5	0.2771	0.448309
P.nudum_cc	B.umbellat	67.33	162.33	0.604	111.67	482.67	0.2766	0.457947
P.nudum_cc	F.hygromet	68.08	152.33	0.6796	81.92	492.67	0.188	0.276633
P.nudum_cc	C.tinctori	66.83	162	0.599	117.17	483	0.2931	0.489316
P.nudum_cc	S.miltiorr	63.50	162	0.5546	116.5	483	0.291	0.524702
P.nudum_cc	C.sativa_c	64.67	162.5	0.5672	111.33	482.5	0.2758	0.486248
P.nudum_cc	G.max_ccmC	65.67	163.17	0.5769	110.33	481.83	0.2732	0.473566
P.nudum_cc	D.hancocki	70.33	162.75	0.6439	114.67	482.25	0.286	0.444168
P.nudum_cc	D.officina	71.33	162.75	0.6585	114.67	482.25	0.286	0.43432
P.nudum_cc	D.huoshane	71.33	162.75	0.6585	114.67	482.25	0.286	0.43432
O.sativa_c	A.officina	13.00	163.58	0.084	9.00	481.42	0.0189	0.225
O.sativa_c	M.baccata_	16.00	163.33	0.105	15.00	481.67	0.0318	0.302857
O.sativa_c	V.vinifera	15.50	163.67	0.1012	16.50	481.33	0.0351	0.346838
O.sativa_c	C.coggygri	17.50	162.67	0.1161	18.50	482.33	0.0394	0.339363
O.sativa_c	O.fragrans	17.50	163.33	0.1156	16.50	481.67	0.0351	0.303633
O.sativa_c	C.quinoa_c	26.50	159.25	0.1881	25.50	485.75	0.0544	0.289208
O.sativa_c	C.japonica	18.50	162.25	0.1237	23.50	482.75	0.0503	0.406629
O.sativa_c	B.juncea_c	20.00	162	0.1349	19.00	483	0.0404	0.299481
O.sativa_c	B.umbellat	26.50	162.83	0.1835	31.50	482.17	0.0684	0.372752
O.sativa_c	F.hygromet	57.58	152.83	0.5234	103.42	492.17	0.2466	0.47115
O.sativa_c	C.tinctori	18.50	162.5	0.1235	21.50	482.5	0.0459	0.37166
O.sativa_c	S.miltiorr	18.50	162.5	0.1235	20.50	482.5	0.0437	0.353846
O.sativa_c	C.sativa_c	17.50	163	0.1159	18.50	482	0.0394	0.339948
O.sativa_c	G.max_ccmC	20.00	163.67	0.1334	19.00	481.33	0.0406	0.304348
O.sativa_c	D.hancocki	15.50	163.25	0.1015	11.50	481.75	0.0243	0.239409
O.sativa_c	D.officina	16.50	163.25	0.1086	11.50	481.75	0.0243	0.223757
O.sativa_c	D.huoshane	17.50	163.25	0.1157	11.50	481.75	0.0243	0.210026
A.officina	M.baccata_	17.00	163.75	0.1117	14.00	481.25	0.0297	0.265891
A.officina	V.vinifera	16.00	164.08	0.1045	16.00	480.92	0.034	0.325359
A.officina	C.coggygri	18.00	163.08	0.1194	18.00	481.92	0.0383	0.320771
A.officina	O.fragrans	18.00	163.75	0.1189	16.00	481.25	0.034	0.285955
A.officina	C.quinoa_c	27.50	159.67	0.1957	24.50	485.33	0.0523	0.267246
A.officina	C.japonica	19.00	162.67	0.127	23.00	482.33	0.0493	0.388189
A.officina	B.juncea_c	23.00	162.42	0.1569	20.00	482.58	0.0426	0.271511
A.officina	B.umbellat	21.50	163.25	0.1448	26.50	481.75	0.0571	0.394337
A.officina	F.hygromet	58.42	153.25	0.5323	101.58	491.75	0.2416	0.453879
A.officina	C.tinctori	19.50	162.92	0.1304	16.50	482.08	0.035	0.268405
A.officina	S.miltiorr	19.50	162.92	0.1304	19.50	482.08	0.0416	0.319018
A.officina	C.sativa_c	17.00	163.42	0.112	18.00	481.58	0.0383	0.341964
A.officina	G.max_ccmC	21.50	164.08	0.144	20.50	480.92	0.0439	0.304861
A.officina	D.hancocki	9.50	163.67	0.0604	12.50	481.33	0.0264	0.437086
A.officina	D.officina	10.50	163.67	0.0671	12.50	481.33	0.0264	0.393443
A.officina	D.huoshane	11.50	163.67	0.0738	12.50	481.33	0.0264	0.357724
M.baccata_	V.vinifera	7.00	163.83	0.044	10.00	481.17	0.0211	0.479545
M.baccata_	C.coggygri	1.00	162.83	0.0062	6.00	482.17	0.0125	2.01613
M.baccata_	O.fragrans	4.00	163.5	0.0249	8.00	481.5	0.0168	0.674699
M.baccata_	C.quinoa_c	12.50	159.42	0.0828	20.50	485.58	0.0435	0.525362
M.baccata_	C.japonica	5.50	162.42	0.0347	16.50	482.58	0.035	1.00865
M.baccata_	B.juncea_c	10.00	162.17	0.0643	9.00	482.83	0.0189	0.293935
M.baccata_	B.umbellat	19.50	163	0.1303	36.50	482	0.0798	0.612433
M.baccata_	F.hygromet	53.08	153	0.4658	101.92	492	0.2424	0.520395
M.baccata_	C.tinctori	5.00	162.67	0.0314	12.00	482.33	0.0253	0.805732
M.baccata_	S.miltiorr	5.50	162.67	0.0346	11.50	482.33	0.0242	0.699422
M.baccata_	C.sativa_c	1.00	163.17	0.0062	4.00	481.83	0.0083	1.33871
M.baccata_	G.max_ccmC	5.00	163.83	0.0312	10.00	481.17	0.0211	0.676282
M.baccata_	D.hancocki	16.50	163.42	0.1084	16.50	481.58	0.0351	0.323801
M.baccata_	D.officina	17.50	163.42	0.1155	16.50	481.58	0.0351	0.303896
M.baccata_	D.huoshane	18.50	163.42	0.1227	16.50	481.58	0.0351	0.286064
V.vinifera	C.coggygri	8.00	163.17	0.0507	12.00	481.83	0.0253	0.499014
V.vinifera	O.fragrans	9.00	163.83	0.057	10.00	481.17	0.0211	0.370175
V.vinifera	C.quinoa_c	17.50	159.75	0.1184	20.50	485.25	0.0435	0.367399
V.vinifera	C.japonica	9.50	162.75	0.0608	18.50	482.25	0.0394	0.648026
V.vinifera	B.juncea_c	13.00	162.5	0.0846	15.00	482.5	0.0318	0.375887
V.vinifera	B.umbellat	24.50	163.33	0.1674	38.50	481.67	0.0845	0.504779
V.vinifera	F.hygromet	59.08	153.33	0.5408	106.92	491.67	0.2568	0.474852
V.vinifera	C.tinctori	10.00	163	0.064	14.00	482	0.0296	0.4625
V.vinifera	S.miltiorr	9.50	163	0.0607	15.50	482	0.0329	0.54201
V.vinifera	C.sativa_c	8.00	163.5	0.0506	10.00	481.5	0.0211	0.416996
V.vinifera	G.max_ccmC	10.50	164.17	0.0669	14.50	480.83	0.0308	0.460389
V.vinifera	D.hancocki	17.50	163.75	0.1153	20.50	481.25	0.0439	0.380746
V.vinifera	D.officina	18.50	163.75	0.1225	20.50	481.25	0.0439	0.358367
V.vinifera	D.huoshane	19.50	163.75	0.1297	20.50	481.25	0.0439	0.338473
C.coggygri	O.fragrans	5.00	162.83	0.0314	8.00	482.17	0.0168	0.535032
C.coggygri	C.quinoa_c	13.50	158.75	0.0903	18.50	486.25	0.039	0.431894
C.coggygri	C.japonica	4.50	161.75	0.0283	14.50	483.25	0.0306	1.08127
C.coggygri	B.juncea_c	11.00	161.5	0.0714	7.00	483.5	0.0146	0.204482
C.coggygri	B.umbellat	20.50	162.33	0.1383	38.50	482.67	0.0843	0.609544
C.coggygri	F.hygromet	51.92	152.33	0.4544	102.08	492.67	0.2425	0.533671
C.coggygri	C.tinctori	6.00	162	0.038	13.00	483	0.0274	0.721053
C.coggygri	S.miltiorr	5.50	162	0.0347	15.50	483	0.0328	0.945245
C.coggygri	C.sativa_c	2.00	162.5	0.0124	6.00	482.5	0.0125	1.00806
C.coggygri	G.max_ccmC	5.00	163.17	0.0313	10.00	481.83	0.021	0.670927
C.coggygri	D.hancocki	17.50	162.75	0.1161	20.50	482.25	0.0438	0.377261
C.coggygri	D.officina	18.50	162.75	0.1233	20.50	482.25	0.0438	0.355231
C.coggygri	D.huoshane	19.50	162.75	0.1305	20.50	482.25	0.0438	0.335632
O.fragrans	C.quinoa_c	16.00	159.42	0.1077	17.00	485.58	0.0359	0.333333
O.fragrans	C.japonica	7.50	162.42	0.0477	14.50	482.58	0.0307	0.643606
O.fragrans	B.juncea_c	12.00	162.17	0.0779	11.00	482.83	0.0231	0.296534
O.fragrans	B.umbellat	20.50	163	0.1377	36.50	482	0.0798	0.579521
O.fragrans	F.hygromet	54.42	153	0.4822	104.58	492	0.25	0.518457
O.fragrans	C.tinctori	7.00	162.67	0.0443	12.00	482.33	0.0253	0.571106
O.fragrans	S.miltiorr	6.50	162.67	0.0411	9.50	482.33	0.02	0.486618
O.fragrans	C.sativa_c	5.00	163.17	0.0313	10.00	481.83	0.021	0.670927
O.fragrans	G.max_ccmC	11.00	163.83	0.0703	9.00	481.17	0.0189	0.268848
O.fragrans	D.hancocki	17.50	163.42	0.1155	18.50	481.58	0.0394	0.341126
O.fragrans	D.officina	18.50	163.42	0.1227	18.50	481.58	0.0394	0.321108
O.fragrans	D.huoshane	19.50	163.42	0.13	18.50	481.58	0.0394	0.303077
C.quinoa_c	C.japonica	17.00	158.33	0.1159	21.00	486.67	0.0444	0.383089
C.quinoa_c	B.juncea_c	19.50	158.08	0.1348	18.50	486.92	0.039	0.289318
C.quinoa_c	B.umbellat	29.00	158.92	0.2091	43.00	486.08	0.0941	0.450024
C.quinoa_c	F.hygromet	55.17	148.92	0.5108	100.83	496.08	0.2371	0.464174
C.quinoa_c	C.tinctori	15.50	158.58	0.1047	24.50	486.42	0.0521	0.497612
C.quinoa_c	S.miltiorr	13.00	158.58	0.0868	24.00	486.42	0.051	0.587558
C.quinoa_c	C.sativa_c	13.50	159.08	0.0901	22.50	485.92	0.0478	0.530522
C.quinoa_c	G.max_ccmC	18.50	159.75	0.1258	20.50	485.25	0.0435	0.345787
C.quinoa_c	D.hancocki	26.00	159.33	0.184	29.00	485.67	0.0622	0.338043
C.quinoa_c	D.officina	27.00	159.33	0.1921	29.00	485.67	0.0622	0.32379
C.quinoa_c	D.huoshane	27.00	159.33	0.1921	29.00	485.67	0.0622	0.32379
C.japonica	B.juncea_c	14.50	161.08	0.0959	17.50	483.92	0.0371	0.386861
C.japonica	B.umbellat	23.00	161.92	0.1575	40.00	483.08	0.0877	0.556825
C.japonica	F.hygromet	49.58	151.92	0.4284	106.42	493.08	0.2545	0.594071
C.japonica	C.tinctori	7.50	161.58	0.0479	20.50	483.42	0.0437	0.912317
C.japonica	S.miltiorr	7.00	161.58	0.0446	16.00	483.42	0.0339	0.76009
C.japonica	C.sativa_c	6.50	162.08	0.0412	18.50	482.92	0.0393	0.953883
C.japonica	G.max_ccmC	9.50	162.75	0.0608	16.50	482.25	0.035	0.575658
C.japonica	D.hancocki	18.50	162.33	0.1236	23.50	482.67	0.0503	0.406958
C.japonica	D.officina	19.50	162.33	0.1309	23.50	482.67	0.0503	0.384263
C.japonica	D.huoshane	20.50	162.33	0.1383	23.50	482.67	0.0503	0.363702
B.juncea_c	B.umbellat	22.50	161.67	0.1539	41.50	483.33	0.0912	0.592593
B.juncea_c	F.hygromet	55.92	151.67	0.5073	102.08	493.33	0.2421	0.477232
B.juncea_c	C.tinctori	14.00	161.33	0.0922	17.00	483.67	0.036	0.390456
B.juncea_c	S.miltiorr	11.50	161.33	0.0749	18.50	483.67	0.0393	0.5247
B.juncea_c	C.sativa_c	11.00	161.83	0.0713	11.00	483.17	0.0231	0.323983
B.juncea_c	G.max_ccmC	14.00	162.5	0.0915	11.00	482.5	0.0232	0.253552
B.juncea_c	D.hancocki	23.50	162.08	0.1611	20.50	482.92	0.0437	0.27126
B.juncea_c	D.officina	24.50	162.08	0.1688	20.50	482.92	0.0437	0.258886
B.juncea_c	D.huoshane	25.50	162.08	0.1766	20.50	482.92	0.0437	0.247452
B.umbellat	F.hygromet	59.42	152.5	0.5497	114.58	492.5	0.2785	0.50664
B.umbellat	C.tinctori	24.00	162.17	0.1649	40.00	482.83	0.0878	0.532444
B.umbellat	S.miltiorr	21.33	162.17	0.1446	36.67	482.83	0.0801	0.553942
B.umbellat	C.sativa_c	19.50	162.67	0.1306	38.50	482.33	0.0844	0.646248
B.umbellat	G.max_ccmC	24.50	163.33	0.1674	42.50	481.67	0.0939	0.560932
B.umbellat	D.hancocki	21.50	162.92	0.1452	28.50	482.08	0.0616	0.424242
B.umbellat	D.officina	22.50	162.92	0.1526	28.50	482.08	0.0616	0.40367
B.umbellat	D.huoshane	23.50	162.92	0.1602	28.50	482.08	0.0616	0.384519
F.hygromet	C.tinctori	55.58	152.17	0.5007	107.42	492.83	0.2575	0.51428
F.hygromet	S.miltiorr	51.17	152.17	0.4461	107.83	492.83	0.2587	0.579915
F.hygromet	C.sativa_c	54.42	152.67	0.4836	102.58	492.33	0.2441	0.504756
F.hygromet	G.max_ccmC	53.58	153.33	0.4704	98.42	491.67	0.2328	0.494898
F.hygromet	D.hancocki	60.42	152.92	0.5612	102.58	492.08	0.2443	0.435317
F.hygromet	D.officina	61.42	152.92	0.5751	102.58	492.08	0.2443	0.424796
F.hygromet	D.huoshane	61.42	152.92	0.5751	102.58	492.08	0.2443	0.424796
C.tinctori	S.miltiorr	6.50	161.83	0.0413	17.50	483.17	0.0371	0.898305
C.tinctori	C.sativa_c	5.00	162.33	0.0315	13.00	482.67	0.0274	0.869841
C.tinctori	G.max_ccmC	11.00	163	0.0707	16.00	482	0.034	0.480905
C.tinctori	D.hancocki	19.00	162.58	0.127	23.00	482.42	0.0493	0.388189
C.tinctori	D.officina	20.00	162.58	0.1344	23.00	482.42	0.0493	0.366815
C.tinctori	D.huoshane	21.00	162.58	0.1418	23.00	482.42	0.0493	0.347673
S.miltiorr	C.sativa_c	6.50	162.33	0.0411	13.50	482.67	0.0285	0.693431
S.miltiorr	G.max_ccmC	10.50	163	0.0674	16.50	482	0.035	0.519288
S.miltiorr	D.hancocki	19.00	162.58	0.127	20.00	482.42	0.0426	0.335433
S.miltiorr	D.officina	20.00	162.58	0.1344	20.00	482.42	0.0426	0.316964
S.miltiorr	D.huoshane	21.00	162.58	0.1418	20.00	482.42	0.0426	0.300423
C.sativa_c	G.max_ccmC	7.00	163.5	0.0441	10.00	481.5	0.0211	0.478458
C.sativa_c	D.hancocki	17.50	163.08	0.1158	20.50	481.92	0.0438	0.378238
C.sativa_c	D.officina	18.50	163.08	0.123	20.50	481.92	0.0438	0.356098
C.sativa_c	D.huoshane	19.50	163.08	0.1303	20.50	481.92	0.0438	0.336147
G.max_ccmC	D.hancocki	22.00	163.75	0.148	21.00	481.25	0.045	0.304054
G.max_ccmC	D.officina	23.00	163.75	0.1555	21.00	481.25	0.045	0.289389
G.max_ccmC	D.huoshane	24.00	163.75	0.1631	21.00	481.25	0.045	0.275904
D.hancocki	D.officina	1.00	163.33	0.0061	0.00	481.67	0	0
D.hancocki	D.huoshane	2.00	163.33	0.0123	0.00	481.67	0	0
D.officina	D.huoshane	1.00	163.33	0.0061	0.00	481.67	0	0

## Sheet: ccmfn
Seq 1	Seq 2	SynDif	SynPos	Ks	NSynDif	NSynPos	Ka	Ka/Ks
G.elata_cc	A.thaliana	22.67	144.25	0.1763	64.33	464.75	0.153	0.867839
G.elata_cc	Z.mays_ccm	20.83	144	0.1607	49.17	465	0.114	0.709396
G.elata_cc	G.biloba_c	33.58	148.92	0.2682	82.42	460.08	0.2047	0.763236
G.elata_cc	F.gracilis	17.67	146.17	0.1318	58.33	462.83	0.138	1.04704
G.elata_cc	C.sinensis	55.75	145.67	0.5355	149.25	463.33	0.4209	0.785994
G.elata_cc	C.taitunge	30.08	147.5	0.238	77.92	461.5	0.1913	0.803782
G.elata_cc	P.nudum_cc	65.58	146.17	0.6839	139.42	462.83	0.3852	0.56324
G.elata_cc	O.sativa_c	19.83	144.42	0.1517	52.17	464.58	0.1216	0.801582
G.elata_cc	A.officina	17.67	146.33	0.1316	48.33	462.67	0.1125	0.854863
G.elata_cc	M.baccata_	16.17	146.42	0.1194	55.83	462.58	0.1316	1.10218
G.elata_cc	V.vinifera	18.50	145.83	0.139	60.50	463.17	0.1435	1.03237
G.elata_cc	C.coggygri	15.67	146.42	0.1154	55.33	462.58	0.1303	1.12912
G.elata_cc	O.fragrans	16.67	146.75	0.1232	57.33	462.25	0.1356	1.10065
G.elata_cc	C.quinoa_c	16.17	145.08	0.1206	61.83	463.92	0.1468	1.21725
G.elata_cc	C.japonica	18.67	146.58	0.1396	59.33	462.42	0.1407	1.00788
G.elata_cc	B.juncea_c	22.17	143.92	0.1724	63.83	465.08	0.1516	0.87935
G.elata_cc	B.umbellat	26.00	147.42	0.2011	68.00	461.58	0.164	0.815515
G.elata_cc	F.hygromet	65.75	141.25	0.727	136.25	467.75	0.3687	0.507153
G.elata_cc	C.tinctori	17.42	145.75	0.1302	58.58	463.25	0.1385	1.06375
G.elata_cc	S.miltiorr	16.17	147	0.1189	56.83	462	0.1344	1.13036
G.elata_cc	C.sativa_c	18.17	146.83	0.1352	59.83	462.17	0.1421	1.05104
G.elata_cc	G.max_ccmF	17.67	146.58	0.1314	57.33	462.42	0.1355	1.0312
G.elata_cc	D.hancocki	12.67	146.17	0.0921	35.33	462.83	0.0805	0.87405
G.elata_cc	D.officina	12.67	146.17	0.0921	35.33	462.83	0.0805	0.87405
G.elata_cc	D.huoshane	12.67	146.17	0.0921	35.33	462.83	0.0805	0.87405
A.thaliana	Z.mays_ccm	16.50	144.58	0.1238	22.50	464.42	0.0501	0.404685
A.thaliana	G.biloba_c	28.58	149.5	0.2207	59.42	459.5	0.1419	0.642954
A.thaliana	F.gracilis	12.00	146.75	0.0866	19.00	462.25	0.0423	0.488453
A.thaliana	C.sinensis	54.75	146.25	0.5186	127.25	462.75	0.3425	0.660432
A.thaliana	C.taitunge	24.58	148.08	0.1876	54.42	460.92	0.1285	0.684968
A.thaliana	P.nudum_cc	63.00	146.75	0.6372	115	462.25	0.3023	0.474419
A.thaliana	O.sativa_c	17.00	145	0.1275	23.00	464	0.0513	0.402353
A.thaliana	A.officina	12.00	146.92	0.0865	23.00	462.08	0.0515	0.595376
A.thaliana	M.baccata_	12.00	147	0.0864	16.00	462	0.0355	0.41088
A.thaliana	V.vinifera	12.00	146.42	0.0868	22.00	462.58	0.0491	0.565668
A.thaliana	C.coggygri	10.00	147	0.0713	14.00	462	0.0309	0.43338
A.thaliana	O.fragrans	14.00	147.33	0.1016	18.00	461.67	0.04	0.393701
A.thaliana	C.quinoa_c	12.00	145.67	0.0873	20.00	463.33	0.0445	0.509737
A.thaliana	C.japonica	15.00	147.17	0.1096	23.00	461.83	0.0515	0.469891
A.thaliana	B.juncea_c	0.00	144.5	0	1.00	464.5	0.0022	#DIV/0!
A.thaliana	B.umbellat	23.00	148	0.1741	45.00	461	0.1046	0.600804
A.thaliana	F.hygromet	64.92	141.83	0.7067	116.08	467.17	0.3018	0.427055
A.thaliana	C.tinctori	14.00	146.33	0.1023	23.00	462.67	0.0514	0.502444
A.thaliana	S.miltiorr	15.00	147.58	0.1092	21.00	461.42	0.047	0.430403
A.thaliana	C.sativa_c	12.50	147.42	0.09	20.50	461.58	0.0458	0.508889
A.thaliana	G.max_ccmF	14.00	147.17	0.1017	19.00	461.83	0.0423	0.415929
A.thaliana	D.hancocki	16.50	146.75	0.1218	38.50	462.25	0.0883	0.724959
A.thaliana	D.officina	16.50	146.75	0.1218	38.50	462.25	0.0883	0.724959
A.thaliana	D.huoshane	16.50	146.75	0.1218	38.50	462.25	0.0883	0.724959
Z.mays_ccm	G.biloba_c	27.08	149.25	0.2078	51.92	459.75	0.1224	0.589028
Z.mays_ccm	F.gracilis	8.00	146.5	0.0567	17.00	462.5	0.0377	0.664903
Z.mays_ccm	C.sinensis	47.83	146	0.4306	124.17	463	0.3319	0.770785
Z.mays_ccm	C.taitunge	22.58	147.83	0.1708	45.42	461.17	0.1056	0.618267
Z.mays_ccm	P.nudum_cc	58.67	146.5	0.5726	113.33	462.5	0.2967	0.518163
Z.mays_ccm	O.sativa_c	2.00	144.75	0.0139	3.00	464.25	0.0065	0.467626
Z.mays_ccm	A.officina	9.00	146.67	0.064	10.00	462.33	0.0219	0.342187
Z.mays_ccm	M.baccata_	8.00	146.75	0.0566	14.00	462.25	0.0309	0.545936
Z.mays_ccm	V.vinifera	9.00	146.17	0.0642	20.00	462.83	0.0445	0.693146
Z.mays_ccm	C.coggygri	6.00	146.75	0.042	14.00	462.25	0.0309	0.735714
Z.mays_ccm	O.fragrans	10.00	147.08	0.0713	16.00	461.92	0.0355	0.497896
Z.mays_ccm	C.quinoa_c	8.00	145.42	0.0571	21.00	463.58	0.0467	0.817863
Z.mays_ccm	C.japonica	12.00	146.92	0.0865	23.00	462.08	0.0515	0.595376
Z.mays_ccm	B.juncea_c	16.50	144.25	0.1241	23.50	464.75	0.0524	0.42224
Z.mays_ccm	B.umbellat	21.83	147.75	0.1646	40.17	461.25	0.0926	0.562576
Z.mays_ccm	F.hygromet	60.42	141.58	0.6312	112.58	467.42	0.2905	0.460234
Z.mays_ccm	C.tinctori	9.17	146.08	0.0655	20.83	462.92	0.0464	0.708397
Z.mays_ccm	S.miltiorr	11.00	147.33	0.0786	17.00	461.67	0.0378	0.480916
Z.mays_ccm	C.sativa_c	7.50	147.17	0.0528	17.50	461.83	0.0389	0.736742
Z.mays_ccm	G.max_ccmF	9.83	146.92	0.0701	17.17	462.08	0.0381	0.543509
Z.mays_ccm	D.hancocki	12.50	146.5	0.0906	23.50	462.5	0.0526	0.580574
Z.mays_ccm	D.officina	12.50	146.5	0.0906	23.50	462.5	0.0526	0.580574
Z.mays_ccm	D.huoshane	12.50	146.5	0.0906	23.50	462.5	0.0526	0.580574
G.biloba_c	F.gracilis	23.08	151.42	0.1704	49.92	457.58	0.1179	0.691901
G.biloba_c	C.sinensis	62.33	150.92	0.6001	151.67	458.08	0.4368	0.727879
G.biloba_c	C.taitunge	12.00	152.75	0.083	19.00	456.25	0.0428	0.515663
G.biloba_c	P.nudum_cc	59.42	151.42	0.5555	116.58	457.58	0.3113	0.560396
G.biloba_c	O.sativa_c	26.58	149.67	0.2027	53.42	459.33	0.1264	0.623582
G.biloba_c	A.officina	23.08	151.58	0.1702	54.92	457.42	0.1308	0.768508
G.biloba_c	M.baccata_	24.08	151.67	0.1784	48.92	457.33	0.1154	0.646861
G.biloba_c	V.vinifera	24.58	151.08	0.1834	55.42	457.92	0.132	0.719738
G.biloba_c	C.coggygri	22.08	151.67	0.1619	48.92	457.33	0.1154	0.712786
G.biloba_c	O.fragrans	26.08	152	0.1949	48.92	457	0.1155	0.592612
G.biloba_c	C.quinoa_c	24.58	150.33	0.1845	53.42	458.67	0.1266	0.686179
G.biloba_c	C.japonica	24.08	151.83	0.1782	55.92	457.17	0.1335	0.749158
G.biloba_c	B.juncea_c	28.58	149.17	0.2213	60.42	459.83	0.1444	0.652508
G.biloba_c	B.umbellat	39.08	152.67	0.3132	72.92	456.33	0.1797	0.573755
G.biloba_c	F.hygromet	68.42	146.5	0.731	115.58	462.5	0.304	0.415869
G.biloba_c	C.tinctori	21.08	151	0.1545	55.92	458	0.1333	0.862783
G.biloba_c	S.miltiorr	24.08	152.25	0.1777	55.92	456.75	0.1337	0.752392
G.biloba_c	C.sativa_c	21.08	152.08	0.1533	51.92	456.92	0.1232	0.803653
G.biloba_c	G.max_ccmF	24.08	151.83	0.1782	53.92	457.17	0.1283	0.719978
G.biloba_c	D.hancocki	25.58	151.42	0.1914	63.42	457.58	0.1532	0.800418
G.biloba_c	D.officina	25.58	151.42	0.1914	63.42	457.58	0.1532	0.800418
G.biloba_c	D.huoshane	25.58	151.42	0.1914	63.42	457.58	0.1532	0.800418
F.gracilis	C.sinensis	47.75	148.17	0.4212	124.25	460.83	0.3341	0.79321
F.gracilis	C.taitunge	16.08	150	0.1157	46.92	459	0.1099	0.94987
F.gracilis	P.nudum_cc	59.33	148.67	0.5697	107.67	460.33	0.2803	0.492013
F.gracilis	O.sativa_c	8.00	146.92	0.0565	18.00	462.08	0.04	0.707965
F.gracilis	A.officina	4.00	148.83	0.0274	18.00	460.17	0.0402	1.46715
F.gracilis	M.baccata_	4.00	148.92	0.0274	5.00	460.08	0.0109	0.39781
F.gracilis	V.vinifera	4.00	148.33	0.0275	15.00	460.67	0.0333	1.21091
F.gracilis	C.coggygri	2.00	148.92	0.0136	6.00	460.08	0.0132	0.970588
F.gracilis	O.fragrans	6.00	149.25	0.0413	9.00	459.75	0.0198	0.479419
F.gracilis	C.quinoa_c	4.00	147.58	0.0276	13.00	461.42	0.0287	1.03986
F.gracilis	C.japonica	8.00	149.08	0.0557	16.00	459.92	0.0356	0.639138
F.gracilis	B.juncea_c	12.00	146.42	0.0868	20.00	462.58	0.0445	0.512673
F.gracilis	B.umbellat	20.83	149.92	0.1537	37.17	459.08	0.0857	0.55758
F.gracilis	F.hygromet	60.75	143.75	0.6217	113.25	465.25	0.2943	0.473379
F.gracilis	C.tinctori	6.00	148.25	0.0416	14.00	460.75	0.031	0.745192
F.gracilis	S.miltiorr	7.00	149.5	0.0483	14.00	459.5	0.0311	0.643892
F.gracilis	C.sativa_c	2.50	149.33	0.0169	11.50	459.67	0.0254	1.50296
F.gracilis	G.max_ccmF	6.00	149.08	0.0414	12.00	459.92	0.0266	0.642512
F.gracilis	D.hancocki	8.50	148.67	0.0595	32.50	460.33	0.0741	1.24538
F.gracilis	D.officina	8.50	148.67	0.0595	32.50	460.33	0.0741	1.24538
F.gracilis	D.huoshane	8.50	148.67	0.0595	32.50	460.33	0.0741	1.24538
C.sinensis	C.taitunge	55.08	149.5	0.5069	147.92	459.5	0.4206	0.829749
C.sinensis	P.nudum_cc	84.25	148.17	1.0646	182.75	460.83	0.5643	0.530058
C.sinensis	O.sativa_c	49.50	146.42	0.4494	124.5	462.58	0.3334	0.741878
C.sinensis	A.officina	50.42	148.33	0.4527	126.58	460.67	0.3422	0.755909
C.sinensis	M.baccata_	50.75	148.42	0.4565	121.25	460.58	0.3242	0.710186
C.sinensis	V.vinifera	50.00	147.83	0.4497	128	461.17	0.3466	0.770736
C.sinensis	C.coggygri	48.75	148.42	0.4321	119.25	460.58	0.3176	0.735015
C.sinensis	O.fragrans	52.75	148.75	0.4802	121.25	460.25	0.3245	0.67576
C.sinensis	C.quinoa_c	50.08	147.08	0.4539	124.92	461.92	0.3354	0.738929
C.sinensis	C.japonica	54.25	148.58	0.5003	122.75	460.42	0.3294	0.658405
C.sinensis	B.juncea_c	54.75	145.92	0.5203	126.25	463.08	0.3388	0.651163
C.sinensis	B.umbellat	61.50	149.42	0.5969	139.5	459.58	0.389	0.6517
C.sinensis	F.hygromet	79.42	143.25	1.008	191.58	465.75	0.5963	0.591567
C.sinensis	C.tinctori	52.42	147.75	0.4804	125.58	461.25	0.3383	0.704205
C.sinensis	S.miltiorr	54.75	149	0.5049	122.25	460	0.3281	0.649832
C.sinensis	C.sativa_c	49.42	148.83	0.4385	124.58	460.17	0.3359	0.766021
C.sinensis	G.max_ccmF	51.00	148.58	0.4589	119	460.42	0.3169	0.690564
C.sinensis	D.hancocki	51.08	148.17	0.4617	135.92	460.83	0.3747	0.811566
C.sinensis	D.officina	51.08	148.17	0.4617	135.92	460.83	0.3747	0.811566
C.sinensis	D.huoshane	51.08	148.17	0.4617	135.92	460.83	0.3747	0.811566
C.taitunge	P.nudum_cc	55.75	150	0.5132	111.25	459	0.2927	0.570343
C.taitunge	O.sativa_c	22.08	148.25	0.1661	46.92	460.75	0.1094	0.658639
C.taitunge	A.officina	17.58	150.17	0.1273	51.42	458.83	0.1214	0.953653
C.taitunge	M.baccata_	18.08	150.25	0.1312	43.92	458.75	0.1024	0.780488
C.taitunge	V.vinifera	16.58	149.67	0.1199	50.42	459.33	0.1187	0.989992
C.taitunge	C.coggygri	16.08	150.25	0.1155	43.92	458.75	0.1024	0.88658
C.taitunge	O.fragrans	20.08	150.58	0.1469	43.92	458.42	0.1025	0.697754
C.taitunge	C.quinoa_c	18.58	148.92	0.1365	50.42	460.08	0.1185	0.868132
C.taitunge	C.japonica	18.08	150.42	0.131	50.92	458.58	0.1202	0.917557
C.taitunge	B.juncea_c	24.58	147.75	0.1881	55.42	461.25	0.1309	0.695906
C.taitunge	B.umbellat	32.58	151.25	0.254	67.42	457.75	0.164	0.645669
C.taitunge	F.hygromet	63.08	145.08	0.6502	109.92	463.92	0.2847	0.437865
C.taitunge	C.tinctori	17.58	149.58	0.1279	49.42	459.42	0.1161	0.90774
C.taitunge	S.miltiorr	19.08	150.83	0.1386	49.92	458.17	0.1177	0.849206
C.taitunge	C.sativa_c	14.08	150.67	0.0998	46.92	458.33	0.1101	1.10321
C.taitunge	G.max_ccmF	19.58	150.42	0.143	48.42	458.58	0.1138	0.795804
C.taitunge	D.hancocki	22.08	150	0.1639	59.92	459	0.1434	0.874924
C.taitunge	D.officina	22.08	150	0.1639	59.92	459	0.1434	0.874924
C.taitunge	D.huoshane	22.08	150	0.1639	59.92	459	0.1434	0.874924
P.nudum_cc	O.sativa_c	57.67	146.92	0.5557	114.33	462.08	0.3003	0.540399
P.nudum_cc	A.officina	60.00	148.83	0.5784	112	460.17	0.2942	0.508645
P.nudum_cc	M.baccata_	58.33	148.92	0.5541	107.67	460.08	0.2805	0.506226
P.nudum_cc	V.vinifera	59.33	148.33	0.5716	110.67	460.67	0.2896	0.506648
P.nudum_cc	C.coggygri	59.33	148.92	0.5683	107.67	460.08	0.2805	0.493577
P.nudum_cc	O.fragrans	59.83	149.25	0.5735	109.17	459.75	0.2855	0.49782
P.nudum_cc	C.quinoa_c	60.33	147.58	0.5907	107.67	461.42	0.2795	0.473167
P.nudum_cc	C.japonica	58.83	149.08	0.5602	111.17	459.92	0.2918	0.520885
P.nudum_cc	B.juncea_c	63.00	146.42	0.6395	116	462.58	0.3052	0.477248
P.nudum_cc	B.umbellat	68.00	149.92	0.6962	119	459.08	0.318	0.456765
P.nudum_cc	F.hygromet	63.67	143.75	0.6697	95.33	465.25	0.2393	0.357324
P.nudum_cc	C.tinctori	61.33	148.25	0.6016	111.67	460.75	0.2927	0.486536
P.nudum_cc	S.miltiorr	58.33	149.5	0.5509	112.67	459.5	0.2969	0.538936
P.nudum_cc	C.sativa_c	58.83	149.33	0.5588	109.17	459.67	0.2856	0.511095
P.nudum_cc	G.max_ccmF	61.33	149.08	0.5964	110.67	459.92	0.2902	0.486586
P.nudum_cc	D.hancocki	65.83	148.67	0.6695	121.17	460.33	0.3242	0.484242
P.nudum_cc	D.officina	65.83	148.67	0.6695	121.17	460.33	0.3242	0.484242
P.nudum_cc	D.huoshane	65.83	148.67	0.6695	121.17	460.33	0.3242	0.484242
O.sativa_c	A.officina	9.00	147.08	0.0638	11.00	461.92	0.0242	0.37931
O.sativa_c	M.baccata_	6.00	147.17	0.0419	15.00	461.83	0.0332	0.792363
O.sativa_c	V.vinifera	8.00	146.58	0.0567	23.00	462.42	0.0515	0.908289
O.sativa_c	C.coggygri	6.00	147.17	0.0419	15.00	461.83	0.0332	0.792363
O.sativa_c	O.fragrans	10.00	147.5	0.0711	17.00	461.5	0.0378	0.531646
O.sativa_c	C.quinoa_c	8.00	145.83	0.057	22.00	463.17	0.0491	0.861404
O.sativa_c	C.japonica	12.00	147.33	0.0862	22.00	461.67	0.0492	0.570766
O.sativa_c	B.juncea_c	17.00	144.67	0.1278	24.00	464.33	0.0536	0.419405
O.sativa_c	B.umbellat	21.83	148.17	0.1641	41.17	460.83	0.0951	0.579525
O.sativa_c	F.hygromet	59.42	142	0.6122	112.58	467	0.2908	0.475008
O.sativa_c	C.tinctori	9.17	146.5	0.0653	21.83	462.5	0.0488	0.74732
O.sativa_c	S.miltiorr	11.00	147.75	0.0784	18.00	461.25	0.0401	0.51148
O.sativa_c	C.sativa_c	7.50	147.58	0.0526	18.50	461.42	0.0412	0.78327
O.sativa_c	G.max_ccmF	9.83	147.33	0.0699	18.17	461.67	0.0404	0.577969
O.sativa_c	D.hancocki	12.50	146.92	0.0903	26.50	462.08	0.0597	0.66113
O.sativa_c	D.officina	12.50	146.92	0.0903	26.50	462.08	0.0597	0.66113
O.sativa_c	D.huoshane	12.50	146.92	0.0903	26.50	462.08	0.0597	0.66113
A.officina	M.baccata_	4.00	149.08	0.0273	15.00	459.92	0.0333	1.21978
A.officina	V.vinifera	4.00	148.5	0.0274	23.00	460.5	0.0517	1.88686
A.officina	C.coggygri	2.00	149.08	0.0135	15.00	459.92	0.0333	2.46667
A.officina	O.fragrans	6.00	149.42	0.0413	17.00	459.58	0.0379	0.917676
A.officina	C.quinoa_c	4.00	147.75	0.0276	21.00	461.25	0.047	1.7029
A.officina	C.japonica	8.00	149.25	0.0556	23.00	459.75	0.0518	0.931655
A.officina	B.juncea_c	12.00	146.58	0.0867	24.00	462.42	0.0538	0.620531
A.officina	B.umbellat	20.33	150.08	0.1494	38.67	458.92	0.0894	0.598394
A.officina	F.hygromet	60.42	143.92	0.6153	115.58	465.08	0.3019	0.490655
A.officina	C.tinctori	5.00	148.42	0.0345	23.00	460.58	0.0517	1.49855
A.officina	S.miltiorr	6.00	149.67	0.0412	19.00	459.33	0.0425	1.03155
A.officina	C.sativa_c	4.50	149.5	0.0307	19.50	459.5	0.0437	1.42345
A.officina	G.max_ccmF	6.00	149.25	0.0413	18.00	459.75	0.0402	0.973366
A.officina	D.hancocki	8.50	148.83	0.0594	22.50	460.17	0.0506	0.851852
A.officina	D.officina	8.50	148.83	0.0594	22.50	460.17	0.0506	0.851852
A.officina	D.huoshane	8.50	148.83	0.0594	22.50	460.17	0.0506	0.851852
M.baccata_	V.vinifera	4.00	148.58	0.0274	12.00	460.42	0.0265	0.967153
M.baccata_	C.coggygri	2.00	149.17	0.0135	3.00	459.83	0.0066	0.488889
M.baccata_	O.fragrans	6.00	149.5	0.0412	6.00	459.5	0.0132	0.320388
M.baccata_	C.quinoa_c	4.00	147.83	0.0276	12.00	461.17	0.0265	0.960145
M.baccata_	C.japonica	8.00	149.33	0.0556	13.00	459.67	0.0288	0.517986
M.baccata_	B.juncea_c	12.00	146.67	0.0866	17.00	462.33	0.0377	0.435335
M.baccata_	B.umbellat	20.83	150.17	0.1534	33.17	458.83	0.076	0.495437
M.baccata_	F.hygromet	61.25	144	0.628	112.75	465	0.2929	0.466401
M.baccata_	C.tinctori	6.00	148.5	0.0415	11.00	460.5	0.0243	0.585542
M.baccata_	S.miltiorr	7.00	149.75	0.0483	11.00	459.25	0.0243	0.503106
M.baccata_	C.sativa_c	4.50	149.58	0.0307	8.50	459.42	0.0187	0.609121
M.baccata_	G.max_ccmF	6.00	149.33	0.0413	9.00	459.67	0.0198	0.479419
M.baccata_	D.hancocki	8.50	148.92	0.0594	29.50	460.08	0.067	1.12795
M.baccata_	D.officina	8.50	148.92	0.0594	29.50	460.08	0.067	1.12795
M.baccata_	D.huoshane	8.50	148.92	0.0594	29.50	460.08	0.067	1.12795
V.vinifera	C.coggygri	2.00	148.58	0.0136	12.00	460.42	0.0265	1.94853
V.vinifera	O.fragrans	6.00	148.92	0.0414	14.00	460.08	0.0311	0.751208
V.vinifera	C.quinoa_c	4.00	147.25	0.0277	22.00	461.75	0.0492	1.77617
V.vinifera	C.japonica	8.00	148.75	0.0558	19.00	460.25	0.0425	0.761649
V.vinifera	B.juncea_c	12.00	146.08	0.087	23.00	462.92	0.0514	0.590805
V.vinifera	B.umbellat	19.83	149.58	0.1459	43.17	459.42	0.1004	0.688143
V.vinifera	F.hygromet	61.75	143.42	0.6401	116.25	465.58	0.3036	0.474301
V.vinifera	C.tinctori	6.00	147.92	0.0417	19.00	461.08	0.0424	1.01679
V.vinifera	S.miltiorr	7.00	149.17	0.0485	19.00	459.83	0.0425	0.876289
V.vinifera	C.sativa_c	4.50	149	0.0308	16.50	460	0.0368	1.19481
V.vinifera	G.max_ccmF	6.00	148.75	0.0415	17.00	460.25	0.0379	0.913253
V.vinifera	D.hancocki	9.50	148.33	0.0669	35.50	460.67	0.0813	1.21525
V.vinifera	D.officina	9.50	148.33	0.0669	35.50	460.67	0.0813	1.21525
V.vinifera	D.huoshane	9.50	148.33	0.0669	35.50	460.67	0.0813	1.21525
C.coggygri	O.fragrans	4.00	149.5	0.0272	6.00	459.5	0.0132	0.485294
C.coggygri	C.quinoa_c	2.00	147.83	0.0137	13.00	461.17	0.0287	2.09489
C.coggygri	C.japonica	6.00	149.33	0.0413	13.00	459.67	0.0288	0.697337
C.coggygri	B.juncea_c	10.00	146.67	0.0715	15.00	462.33	0.0332	0.464336
C.coggygri	B.umbellat	17.83	150.17	0.1293	35.17	458.83	0.0808	0.624903
C.coggygri	F.hygromet	61.25	144	0.628	112.75	465	0.2929	0.466401
C.coggygri	C.tinctori	4.00	148.5	0.0274	11.00	460.5	0.0243	0.886861
C.coggygri	S.miltiorr	5.00	149.75	0.0342	11.00	459.25	0.0243	0.710526
C.coggygri	C.sativa_c	2.50	149.58	0.0169	8.50	459.42	0.0187	1.10651
C.coggygri	G.max_ccmF	4.00	149.33	0.0273	9.00	459.67	0.0198	0.725275
C.coggygri	D.hancocki	6.50	148.92	0.045	29.50	460.08	0.067	1.48889
C.coggygri	D.officina	6.50	148.92	0.045	29.50	460.08	0.067	1.48889
C.coggygri	D.huoshane	6.50	148.92	0.045	29.50	460.08	0.067	1.48889
O.fragrans	C.quinoa_c	6.00	148.17	0.0416	16.00	460.83	0.0355	0.853365
O.fragrans	C.japonica	4.00	149.67	0.0272	9.00	459.33	0.0199	0.731618
O.fragrans	B.juncea_c	14.00	147	0.1019	19.00	462	0.0423	0.415113
O.fragrans	B.umbellat	19.83	150.5	0.1449	37.17	458.5	0.0858	0.592133
O.fragrans	F.hygromet	61.75	144.33	0.6337	109.25	464.67	0.2821	0.445163
O.fragrans	C.tinctori	6.00	148.83	0.0414	9.00	460.17	0.0198	0.478261
O.fragrans	S.miltiorr	3.00	150.08	0.0203	7.00	458.92	0.0154	0.758621
O.fragrans	C.sativa_c	6.50	149.92	0.0447	10.50	459.08	0.0232	0.519016
O.fragrans	G.max_ccmF	8.00	149.67	0.0555	11.00	459.33	0.0243	0.437838
O.fragrans	D.hancocki	10.50	149.25	0.0739	31.50	459.75	0.0718	0.971583
O.fragrans	D.officina	10.50	149.25	0.0739	31.50	459.75	0.0718	0.971583
O.fragrans	D.huoshane	10.50	149.25	0.0739	31.50	459.75	0.0718	0.971583
C.quinoa_c	C.japonica	8.00	148	0.0561	23.00	461	0.0516	0.919786
C.quinoa_c	B.juncea_c	12.00	145.33	0.0875	21.00	463.67	0.0467	0.533714
C.quinoa_c	B.umbellat	19.83	148.83	0.1467	44.17	460.17	0.1027	0.700068
C.quinoa_c	F.hygromet	61.42	142.67	0.64	111.58	466.33	0.2882	0.450313
C.quinoa_c	C.tinctori	6.50	147.17	0.0455	20.50	461.83	0.0458	1.00659
C.quinoa_c	S.miltiorr	7.00	148.42	0.0487	21.00	460.58	0.047	0.965092
C.quinoa_c	C.sativa_c	4.50	148.25	0.031	18.50	460.75	0.0413	1.33226
C.quinoa_c	G.max_ccmF	6.00	148	0.0417	19.00	461	0.0424	1.01679
C.quinoa_c	D.hancocki	8.50	147.58	0.0599	36.50	461.42	0.0836	1.39566
C.quinoa_c	D.officina	8.50	147.58	0.0599	36.50	461.42	0.0836	1.39566
C.quinoa_c	D.huoshane	8.50	147.58	0.0599	36.50	461.42	0.0836	1.39566
C.japonica	B.juncea_c	15.00	146.83	0.1098	24.00	462.17	0.0538	0.489982
C.japonica	B.umbellat	22.83	150.33	0.1697	44.17	458.67	0.1031	0.607543
C.japonica	F.hygromet	59.25	144.17	0.5955	109.75	464.83	0.2835	0.476071
C.japonica	C.tinctori	8.00	148.67	0.0558	16.00	460.33	0.0356	0.637993
C.japonica	S.miltiorr	5.00	149.92	0.0341	14.00	459.08	0.0311	0.912023
C.japonica	C.sativa_c	8.50	149.75	0.059	17.50	459.25	0.0391	0.662712
C.japonica	G.max_ccmF	10.00	149.5	0.0701	18.00	459.5	0.0402	0.573466
C.japonica	D.hancocki	10.50	149.08	0.074	36.50	459.92	0.0839	1.13378
C.japonica	D.officina	10.50	149.08	0.074	36.50	459.92	0.0839	1.13378
C.japonica	D.huoshane	10.50	149.08	0.074	36.50	459.92	0.0839	1.13378
B.juncea_c	B.umbellat	23.00	147.67	0.1746	46.00	461.33	0.107	0.612829
B.juncea_c	F.hygromet	64.42	141.5	0.7004	116.58	467.5	0.3032	0.432895
B.juncea_c	C.tinctori	14.00	146	0.1026	24.00	463	0.0537	0.523392
B.juncea_c	S.miltiorr	15.00	147.25	0.1095	21.00	461.75	0.0469	0.428311
B.juncea_c	C.sativa_c	12.50	147.08	0.0902	21.50	461.92	0.0481	0.533259
B.juncea_c	G.max_ccmF	14.00	146.83	0.102	20.00	462.17	0.0446	0.437255
B.juncea_c	D.hancocki	16.50	146.42	0.1221	39.50	462.58	0.0907	0.742834
B.juncea_c	D.officina	16.50	146.42	0.1221	39.50	462.58	0.0907	0.742834
B.juncea_c	D.huoshane	16.50	146.42	0.1221	39.50	462.58	0.0907	0.742834
B.umbellat	F.hygromet	64.25	145	0.6702	118.75	464	0.313	0.467025
B.umbellat	C.tinctori	21.83	149.5	0.1624	39.17	459.5	0.0905	0.557266
B.umbellat	S.miltiorr	23.33	150.75	0.1734	39.67	458.25	0.092	0.530565
B.umbellat	C.sativa_c	19.33	150.58	0.1408	38.67	458.42	0.0895	0.635653
B.umbellat	G.max_ccmF	20.33	150.33	0.1491	36.67	458.67	0.0845	0.566734
B.umbellat	D.hancocki	19.83	149.92	0.1455	47.17	459.08	0.1105	0.75945
B.umbellat	D.officina	19.83	149.92	0.1455	47.17	459.08	0.1105	0.75945
B.umbellat	D.huoshane	19.83	149.92	0.1455	47.17	459.08	0.1105	0.75945
F.hygromet	C.tinctori	64.08	143.33	0.68	112.92	465.67	0.2929	0.430735
F.hygromet	S.miltiorr	61.75	144.58	0.632	113.25	464.42	0.2949	0.466614
F.hygromet	C.sativa_c	61.08	144.42	0.6225	113.92	464.58	0.2969	0.476948
F.hygromet	G.max_ccmF	62.08	144.17	0.6403	113.92	464.83	0.2967	0.463377
F.hygromet	D.hancocki	62.08	143.75	0.6432	127.92	465.25	0.3425	0.532494
F.hygromet	D.officina	62.08	143.75	0.6432	127.92	465.25	0.3425	0.532494
F.hygromet	D.huoshane	62.08	143.75	0.6432	127.92	465.25	0.3425	0.532494
C.tinctori	S.miltiorr	3.00	149.08	0.0204	10.00	459.92	0.0221	1.08333
C.tinctori	C.sativa_c	6.50	148.92	0.045	13.50	460.08	0.0299	0.664444
C.tinctori	G.max_ccmF	8.00	148.67	0.0558	16.00	460.33	0.0356	0.637993
C.tinctori	D.hancocki	10.50	148.25	0.0744	36.50	460.75	0.0837	1.125
C.tinctori	D.officina	10.50	148.25	0.0744	36.50	460.75	0.0837	1.125
C.tinctori	D.huoshane	10.50	148.25	0.0744	36.50	460.75	0.0837	1.125
S.miltiorr	C.sativa_c	7.50	150.17	0.0517	13.50	458.83	0.03	0.580271
S.miltiorr	G.max_ccmF	9.00	149.92	0.0626	14.00	459.08	0.0311	0.496805
S.miltiorr	D.hancocki	11.50	149.5	0.0812	32.50	459.5	0.0743	0.915025
S.miltiorr	D.officina	11.50	149.5	0.0812	32.50	459.5	0.0743	0.915025
S.miltiorr	D.huoshane	11.50	149.5	0.0812	32.50	459.5	0.0743	0.915025
C.sativa_c	G.max_ccmF	6.50	149.75	0.0447	13.50	459.25	0.03	0.671141
C.sativa_c	D.hancocki	8.50	149.33	0.0592	33.50	459.67	0.0767	1.29561
C.sativa_c	D.officina	8.50	149.33	0.0592	33.50	459.67	0.0767	1.29561
C.sativa_c	D.huoshane	8.50	149.33	0.0592	33.50	459.67	0.0767	1.29561
G.max_ccmF	D.hancocki	8.50	149.08	0.0593	31.50	459.92	0.0718	1.21079
G.max_ccmF	D.officina	8.50	149.08	0.0593	31.50	459.92	0.0718	1.21079
G.max_ccmF	D.huoshane	8.50	149.08	0.0593	31.50	459.92	0.0718	1.21079
D.hancocki	D.officina	0.00	148.67	0	0.00	460.33	0	#DIV/0!
D.hancocki	D.huoshane	0.00	148.67	0	0.00	460.33	0	#DIV/0!
D.officina	D.huoshane	0.00	148.67	0	0.00	460.33	0	#DIV/0!

## Sheet: cob
Seq 1	Seq 2	SynDif	SynPos	Ks	NSynDif	NSynPos	Ka	Ka/Ks
G.elata_co	A.thaliana	25.00	277.42	0.096	36.00	874.58	0.0423	0.440625
G.elata_co	Z.mays_cob	18.00	278	0.0677	36.00	874	0.0424	0.626292
G.elata_co	G.biloba_c	47.50	279.83	0.1925	58.50	872.17	0.0703	0.365195
G.elata_co	F.gracilis	20.50	277.25	0.0778	40.50	874.75	0.0478	0.614396
G.elata_co	C.sinensis	19.50	277.17	0.0739	31.50	874.83	0.0369	0.499323
G.elata_co	C.taitunge	41.50	288.75	0.1596	95.50	863.25	0.1197	0.75
G.elata_co	P.nudum_co	131.83	282.5	0.7301	94.17	869.5	0.117	0.160252
G.elata_co	O.sativa_c	18.00	277.83	0.0678	33.00	874.17	0.0387	0.570796
G.elata_co	A.officina	14.50	278.5	0.054	28.50	873.5	0.0334	0.618519
G.elata_co	M.baccata_	24.00	277.58	0.0919	34.00	874.42	0.0399	0.434168
G.elata_co	V.vinifera	16.00	279.67	0.0595	32.00	872.33	0.0376	0.631933
G.elata_co	C.coggygri	20.00	277.5	0.0758	32.00	874.5	0.0375	0.494723
G.elata_co	O.fragrans	25.00	278.25	0.0957	32.00	873.75	0.0375	0.39185
G.elata_co	C.quinoa_c	32.00	277	0.1255	39.00	875	0.046	0.366534
G.elata_co	C.japonica	22.50	277.67	0.0858	37.50	874.33	0.0442	0.515152
G.elata_co	B.juncea_c	26.00	277.42	0.1001	36.00	874.58	0.0423	0.422577
G.elata_co	B.umbellat	26.83	280.92	0.1022	33.17	871.08	0.0391	0.382583
G.elata_co	F.hygromet	112.58	276.58	0.5869	98.42	875.42	0.1218	0.207531
G.elata_co	C.tinctori	23.00	278.75	0.0874	28.00	873.25	0.0328	0.375286
G.elata_co	S.miltiorr	45.00	277.75	0.1825	39.00	874.25	0.046	0.252055
G.elata_co	C.sativa_c	20.00	277.58	0.0758	38.00	874.42	0.0448	0.591029
G.elata_co	G.max_cob	19.00	278.58	0.0715	33.00	873.42	0.0388	0.542657
G.elata_co	D.hancocki	8.50	280.67	0.0309	14.50	871.33	0.0168	0.543689
G.elata_co	D.officina	9.00	281	0.0327	15.00	871	0.0174	0.53211
G.elata_co	D.huoshane	9.00	280	0.0329	16.00	872	0.0186	0.56535
A.thaliana	Z.mays_cob	21.17	274.25	0.0814	24.83	877.75	0.0288	0.353808
A.thaliana	G.biloba_c	54.50	276.08	0.2291	40.50	875.92	0.0477	0.208206
A.thaliana	F.gracilis	24.00	273.5	0.0933	12.00	878.5	0.0138	0.14791
A.thaliana	C.sinensis	21.00	273.42	0.081	11.00	878.58	0.0126	0.155556
A.thaliana	C.taitunge	48.50	285	0.193	84.50	867	0.1044	0.540933
A.thaliana	P.nudum_co	130.75	278.75	0.7364	93.25	873.25	0.1152	0.156437
A.thaliana	O.sativa_c	21.17	274.08	0.0815	23.83	877.92	0.0277	0.339877
A.thaliana	A.officina	24.00	274.75	0.0929	21.00	877.25	0.0243	0.261572
A.thaliana	M.baccata_	24.00	273.83	0.0932	12.00	878.17	0.0138	0.148069
A.thaliana	V.vinifera	14.00	275.92	0.0525	20.00	876.08	0.0232	0.441905
A.thaliana	C.coggygri	17.00	273.75	0.0648	10.00	878.25	0.0115	0.177469
A.thaliana	O.fragrans	21.00	274.5	0.0807	13.00	877.5	0.015	0.185874
A.thaliana	C.quinoa_c	30.50	273.25	0.1209	23.50	878.75	0.0272	0.224979
A.thaliana	C.japonica	22.00	273.92	0.085	16.00	878.08	0.0184	0.216471
A.thaliana	B.juncea_c	1.00	273.67	0.0037	0.00	878.33	0	0
A.thaliana	B.umbellat	40.50	277.17	0.1625	27.50	874.83	0.0321	0.197538
A.thaliana	F.hygromet	108.42	272.83	0.566	89.58	879.17	0.1095	0.193463
A.thaliana	C.tinctori	21.00	275	0.0805	16.00	877	0.0185	0.229814
A.thaliana	S.miltiorr	37.00	274	0.1489	19.00	878	0.022	0.14775
A.thaliana	C.sativa_c	17.00	273.83	0.0648	17.00	878.17	0.0196	0.302469
A.thaliana	G.max_cob	20.00	274.83	0.0765	17.00	877.17	0.0196	0.256209
A.thaliana	D.hancocki	19.00	276.92	0.072	25.00	875.08	0.0291	0.404167
A.thaliana	D.officina	18.00	277.25	0.0679	25.00	874.75	0.0291	0.428571
A.thaliana	D.huoshane	18.00	276.25	0.0682	24.00	875.75	0.0279	0.409091
Z.mays_cob	G.biloba_c	47.67	276.67	0.1957	50.33	875.33	0.0598	0.30557
Z.mays_cob	F.gracilis	25.67	274.08	0.1	25.33	877.92	0.0294	0.294
Z.mays_cob	C.sinensis	23.17	274	0.0897	23.83	878	0.0276	0.307692
Z.mays_cob	C.taitunge	43.67	285.58	0.171	90.33	866.42	0.1123	0.656725
Z.mays_cob	P.nudum_co	130.58	279.33	0.7322	98.42	872.67	0.1222	0.166894
Z.mays_cob	O.sativa_c	6.00	274.67	0.0222	5.00	877.33	0.0057	0.256757
Z.mays_cob	A.officina	16.17	275.33	0.0611	15.83	876.67	0.0183	0.299509
Z.mays_cob	M.baccata_	26.17	274.42	0.102	26.83	877.58	0.0312	0.305882
Z.mays_cob	V.vinifera	20.17	276.5	0.0767	22.83	875.5	0.0265	0.345502
Z.mays_cob	C.coggygri	22.17	274.33	0.0855	22.83	877.67	0.0265	0.309942
Z.mays_cob	O.fragrans	27.00	275.08	0.1052	23.00	876.92	0.0267	0.253802
Z.mays_cob	C.quinoa_c	34.17	273.83	0.1365	30.83	878.17	0.036	0.263736
Z.mays_cob	C.japonica	25.67	274.5	0.0999	26.33	877.5	0.0306	0.306306
Z.mays_cob	B.juncea_c	22.17	274.25	0.0855	24.83	877.75	0.0288	0.336842
Z.mays_cob	B.umbellat	33.50	277.75	0.1315	24.50	874.25	0.0286	0.21749
Z.mays_cob	F.hygromet	107.58	273.42	0.5578	96.42	878.58	0.1187	0.2128
Z.mays_cob	C.tinctori	25.17	275.58	0.0974	25.83	876.42	0.0301	0.309035
Z.mays_cob	S.miltiorr	44.75	274.58	0.1838	30.25	877.42	0.0353	0.192057
Z.mays_cob	C.sativa_c	22.00	274.42	0.0848	27.00	877.58	0.0314	0.370283
Z.mays_cob	G.max_cob	24.17	275.42	0.0933	27.83	876.58	0.0324	0.347267
Z.mays_cob	D.hancocki	12.17	277.5	0.0452	25.83	874.5	0.0301	0.665929
Z.mays_cob	D.officina	13.17	277.83	0.049	25.83	874.17	0.0301	0.614286
Z.mays_cob	D.huoshane	13.17	276.83	0.0491	24.83	875.17	0.0289	0.588595
G.biloba_c	F.gracilis	48.50	275.92	0.2003	45.50	876.08	0.0538	0.268597
G.biloba_c	C.sinensis	47.00	275.83	0.1933	43.00	876.17	0.0508	0.262804
G.biloba_c	C.taitunge	28.17	287.42	0.105	67.83	864.58	0.0829	0.789524
G.biloba_c	P.nudum_co	126.08	281.17	0.6833	85.92	870.83	0.1058	0.154837
G.biloba_c	O.sativa_c	47.67	276.5	0.1959	49.33	875.5	0.0586	0.299132
G.biloba_c	A.officina	43.00	277.17	0.1738	47.00	874.83	0.0557	0.320483
G.biloba_c	M.baccata_	49.50	276.25	0.2048	42.50	875.75	0.0502	0.245117
G.biloba_c	V.vinifera	46.00	278.33	0.1867	48.00	873.67	0.0571	0.305838
G.biloba_c	C.coggygri	46.00	276.17	0.1884	42.00	875.83	0.0496	0.26327
G.biloba_c	O.fragrans	51.00	276.92	0.2113	43.00	875.08	0.0508	0.240416
G.biloba_c	C.quinoa_c	54.50	275.67	0.2295	38.50	876.33	0.0453	0.197386
G.biloba_c	C.japonica	51.00	276.33	0.2119	44.00	875.67	0.052	0.245399
G.biloba_c	B.juncea_c	55.50	276.08	0.234	40.50	875.92	0.0477	0.203846
G.biloba_c	B.umbellat	58.00	279.58	0.2428	52.00	872.42	0.0621	0.255766
G.biloba_c	F.hygromet	113.92	275.25	0.6019	80.08	876.75	0.0974	0.161821
G.biloba_c	C.tinctori	46.50	277.42	0.1897	47.50	874.58	0.0564	0.297312
G.biloba_c	S.miltiorr	68.50	276.42	0.3008	48.50	875.58	0.0575	0.191157
G.biloba_c	C.sativa_c	43.50	276.25	0.1767	49.50	875.75	0.0588	0.332767
G.biloba_c	G.max_cob	47.00	277.25	0.1922	47.00	874.75	0.0558	0.290323
G.biloba_c	D.hancocki	40.50	279.33	0.1611	51.50	872.67	0.0615	0.38175
G.biloba_c	D.officina	40.50	279.67	0.1609	51.50	872.33	0.0615	0.382225
G.biloba_c	D.huoshane	41.50	278.67	0.166	50.50	873.33	0.0602	0.362651
F.gracilis	C.sinensis	17.50	273.25	0.0669	9.50	878.75	0.0109	0.16293
F.gracilis	C.taitunge	44.50	284.83	0.1752	90.50	867.17	0.1124	0.641553
F.gracilis	P.nudum_co	140.25	278.58	0.8344	98.75	873.42	0.1226	0.146932
F.gracilis	O.sativa_c	25.67	273.92	0.1001	24.33	878.08	0.0282	0.281718
F.gracilis	A.officina	21.50	274.58	0.0827	21.50	877.42	0.0249	0.301088
F.gracilis	M.baccata_	7.00	273.67	0.026	9.00	878.33	0.0103	0.396154
F.gracilis	V.vinifera	13.50	275.75	0.0506	18.50	876.25	0.0214	0.422925
F.gracilis	C.coggygri	14.50	273.58	0.055	8.50	878.42	0.0097	0.176364
F.gracilis	O.fragrans	19.00	274.33	0.0727	19.00	877.67	0.022	0.302613
F.gracilis	C.quinoa_c	30.00	273.08	0.1188	27.00	878.92	0.0314	0.26431
F.gracilis	C.japonica	19.00	273.75	0.0728	20.00	878.25	0.0231	0.317308
F.gracilis	B.juncea_c	25.00	273.5	0.0975	12.00	878.5	0.0138	0.141538
F.gracilis	B.umbellat	35.50	277	0.1405	30.50	875	0.0357	0.254093
F.gracilis	F.hygromet	116.92	272.67	0.636	93.08	879.33	0.1141	0.179403
F.gracilis	C.tinctori	18.00	274.83	0.0685	19.00	877.17	0.022	0.321168
F.gracilis	S.miltiorr	38.75	273.83	0.1568	25.25	878.17	0.0293	0.186862
F.gracilis	C.sativa_c	12.00	273.67	0.0452	18.00	878.33	0.0208	0.460177
F.gracilis	G.max_cob	13.50	274.67	0.0508	15.50	877.33	0.0179	0.352362
F.gracilis	D.hancocki	18.00	276.75	0.068	29.00	875.25	0.0339	0.498529
F.gracilis	D.officina	17.00	277.08	0.064	29.00	874.92	0.0339	0.529687
F.gracilis	D.huoshane	17.00	276.08	0.0643	28.00	875.92	0.0327	0.508554
C.sinensis	C.taitunge	42.00	284.75	0.1642	87.00	867.25	0.1077	0.655907
C.sinensis	P.nudum_co	137.75	278.5	0.808	95.25	873.5	0.1178	0.145792
C.sinensis	O.sativa_c	23.17	273.83	0.0898	22.83	878.17	0.0265	0.2951
C.sinensis	A.officina	19.00	274.5	0.0726	14.00	877.5	0.0161	0.221763
C.sinensis	M.baccata_	17.00	273.58	0.0649	7.00	878.42	0.008	0.123267
C.sinensis	V.vinifera	13.00	275.67	0.0487	11.00	876.33	0.0127	0.26078
C.sinensis	C.coggygri	9.00	273.5	0.0337	1.00	878.5	0.0011	0.0326409
C.sinensis	O.fragrans	18.00	274.25	0.0687	14.00	877.75	0.0161	0.234352
C.sinensis	C.quinoa_c	23.00	273	0.0894	23.00	879	0.0266	0.297539
C.sinensis	C.japonica	19.00	273.67	0.0729	15.00	878.33	0.0173	0.237311
C.sinensis	B.juncea_c	22.00	273.42	0.0851	11.00	878.58	0.0126	0.148061
C.sinensis	B.umbellat	34.50	276.92	0.1362	28.50	875.08	0.0333	0.244493
C.sinensis	F.hygromet	113.42	272.58	0.6069	92.58	879.42	0.1134	0.186851
C.sinensis	C.tinctori	16.00	274.75	0.0606	17.00	877.25	0.0196	0.323432
C.sinensis	S.miltiorr	38.00	273.75	0.1535	20.00	878.25	0.0231	0.150489
C.sinensis	C.sativa_c	13.00	273.58	0.0491	14.00	878.42	0.0161	0.327902
C.sinensis	G.max_cob	14.00	274.58	0.0528	8.00	877.42	0.0092	0.174242
C.sinensis	D.hancocki	15.00	276.67	0.0563	21.00	875.33	0.0244	0.433393
C.sinensis	D.officina	16.00	277	0.0601	21.00	875	0.0244	0.40599
C.sinensis	D.huoshane	16.00	276	0.0603	20.00	876	0.0232	0.384743
C.taitunge	P.nudum_co	117.58	290.08	0.5831	126.42	861.92	0.1632	0.279883
C.taitunge	O.sativa_c	43.67	285.42	0.1711	87.33	866.58	0.1082	0.632379
C.taitunge	A.officina	40.00	286.08	0.1547	87.00	865.92	0.1079	0.697479
C.taitunge	M.baccata_	44.50	285.17	0.175	86.50	866.83	0.1071	0.612
C.taitunge	V.vinifera	41.00	287.25	0.1583	86.00	864.75	0.1067	0.674037
C.taitunge	C.coggygri	41.00	285.08	0.1597	86.00	866.92	0.1064	0.666249
C.taitunge	O.fragrans	46.00	285.83	0.1811	81.00	866.17	0.0999	0.551629
C.taitunge	C.quinoa_c	47.50	284.58	0.1888	81.50	867.42	0.1004	0.53178
C.taitunge	C.japonica	45.50	285.25	0.1793	86.50	866.75	0.1071	0.597323
C.taitunge	B.juncea_c	49.50	285	0.1976	84.50	867	0.1044	0.52834
C.taitunge	B.umbellat	52.50	288.5	0.2084	85.50	863.5	0.1062	0.509597
C.taitunge	F.hygromet	111.58	284.17	0.5561	131.42	867.83	0.1691	0.304082
C.taitunge	C.tinctori	43.50	286.33	0.1698	86.50	865.67	0.1072	0.631331
C.taitunge	S.miltiorr	60.00	285.33	0.2468	89.00	866.67	0.1104	0.447326
C.taitunge	C.sativa_c	37.50	285.17	0.1446	93.50	866.83	0.1165	0.805671
C.taitunge	G.max_cob	43.50	286.17	0.1699	84.50	865.83	0.1046	0.615656
C.taitunge	D.hancocki	35.50	288.25	0.1345	87.50	863.75	0.1088	0.808922
C.taitunge	D.officina	35.50	288.58	0.1344	87.50	863.42	0.1089	0.810268
C.taitunge	D.huoshane	36.50	287.58	0.139	88.50	864.42	0.1101	0.792086
P.nudum_co	O.sativa_c	132.75	279.17	0.7539	98.25	872.83	0.122	0.161825
P.nudum_co	A.officina	131.75	279.83	0.7412	100.25	872.17	0.1248	0.168376
P.nudum_co	M.baccata_	140.75	278.92	0.838	92.25	873.08	0.1139	0.135919
P.nudum_co	V.vinifera	137.75	281	0.7952	95.25	871	0.1182	0.148642
P.nudum_co	C.coggygri	137.25	278.83	0.801	94.75	873.17	0.1172	0.146317
P.nudum_co	O.fragrans	139.75	279.58	0.8235	89.25	872.42	0.11	0.133576
P.nudum_co	C.quinoa_c	129.25	278.33	0.724	91.75	873.67	0.1131	0.156215
P.nudum_co	C.japonica	133.42	279	0.7612	93.58	873	0.1157	0.151997
P.nudum_co	B.juncea_c	131.75	278.75	0.7461	93.25	873.25	0.1152	0.154403
P.nudum_co	B.umbellat	130.42	282.25	0.718	94.58	869.75	0.1175	0.163649
P.nudum_co	F.hygromet	131.92	277.92	0.7516	78.08	874.08	0.0951	0.12653
P.nudum_co	C.tinctori	136.25	280.08	0.7844	91.75	871.92	0.1134	0.144569
P.nudum_co	S.miltiorr	143.42	279.08	0.8668	91.58	872.92	0.113	0.130365
P.nudum_co	C.sativa_c	136.25	278.92	0.7902	95.75	873.08	0.1186	0.150089
P.nudum_co	G.max_cob	133.92	279.92	0.7619	93.08	872.08	0.1151	0.15107
P.nudum_co	D.hancocki	131.25	282	0.7268	95.75	870	0.119	0.163731
P.nudum_co	D.officina	131.25	282.33	0.7254	95.75	869.67	0.1191	0.164185
P.nudum_co	D.huoshane	132.25	281.33	0.7392	96.75	870.67	0.1203	0.162744
O.sativa_c	A.officina	16.17	275.17	0.0612	12.83	876.83	0.0148	0.24183
O.sativa_c	M.baccata_	26.17	274.25	0.1021	23.83	877.75	0.0277	0.271303
O.sativa_c	V.vinifera	20.17	276.33	0.0768	17.83	875.67	0.0206	0.268229
O.sativa_c	C.coggygri	22.17	274.17	0.0855	21.83	877.83	0.0253	0.295906
O.sativa_c	O.fragrans	27.00	274.92	0.1053	23.00	877.08	0.0267	0.253561
O.sativa_c	C.quinoa_c	35.17	273.67	0.141	27.83	878.33	0.0324	0.229787
O.sativa_c	C.japonica	25.67	274.33	0.0999	27.33	877.67	0.0318	0.318318
O.sativa_c	B.juncea_c	22.17	274.08	0.0856	23.83	877.92	0.0277	0.323598
O.sativa_c	B.umbellat	31.50	277.58	0.123	22.50	874.42	0.0262	0.213008
O.sativa_c	F.hygromet	108.42	273.25	0.5647	98.58	878.75	0.1215	0.215158
O.sativa_c	C.tinctori	24.17	275.42	0.0933	24.83	876.58	0.0289	0.309753
O.sativa_c	S.miltiorr	42.75	274.42	0.1746	30.25	877.58	0.0353	0.202176
O.sativa_c	C.sativa_c	21.00	274.25	0.0808	27.00	877.75	0.0314	0.388614
O.sativa_c	G.max_cob	24.17	275.25	0.0934	24.83	876.75	0.0289	0.309422
O.sativa_c	D.hancocki	12.17	277.33	0.0452	22.83	874.67	0.0266	0.588496
O.sativa_c	D.officina	13.17	277.67	0.049	22.83	874.33	0.0266	0.542857
O.sativa_c	D.huoshane	13.17	276.67	0.0492	21.83	875.33	0.0254	0.51626
A.officina	M.baccata_	22.00	274.92	0.0846	17.00	877.08	0.0196	0.231678
A.officina	V.vinifera	18.00	277	0.068	11.00	875	0.0127	0.186765
A.officina	C.coggygri	18.00	274.83	0.0685	13.00	877.17	0.015	0.218978
A.officina	O.fragrans	23.00	275.58	0.0885	20.00	876.42	0.0232	0.262147
A.officina	C.quinoa_c	33.00	274.33	0.1311	28.00	877.67	0.0326	0.248665
A.officina	C.japonica	22.50	275	0.0866	21.50	877	0.0249	0.287529
A.officina	B.juncea_c	25.00	274.75	0.097	21.00	877.25	0.0243	0.250515
A.officina	B.umbellat	29.50	278.25	0.1143	23.50	873.75	0.0274	0.23972
A.officina	F.hygromet	112.42	273.92	0.5942	94.58	878.08	0.1163	0.195725
A.officina	C.tinctori	19.00	276.08	0.0722	23.00	875.92	0.0267	0.369806
A.officina	S.miltiorr	41.00	275.08	0.1662	27.00	876.92	0.0314	0.188929
A.officina	C.sativa_c	18.00	274.92	0.0685	24.00	877.08	0.0279	0.407299
A.officina	G.max_cob	20.00	275.92	0.0762	18.00	876.08	0.0208	0.272966
A.officina	D.hancocki	8.00	278	0.0293	16.00	874	0.0185	0.631399
A.officina	D.officina	10.00	278.33	0.0368	14.00	873.67	0.0162	0.440217
A.officina	D.huoshane	9.00	277.33	0.0332	15.00	874.67	0.0173	0.521084
M.baccata_	V.vinifera	14.00	276.08	0.0525	10.00	875.92	0.0115	0.219048
M.baccata_	C.coggygri	15.00	273.92	0.0569	6.00	878.08	0.0069	0.121265
M.baccata_	O.fragrans	18.00	274.67	0.0686	15.00	877.33	0.0173	0.252187
M.baccata_	C.quinoa_c	28.00	273.42	0.1101	24.00	878.58	0.0278	0.252498
M.baccata_	C.japonica	21.00	274.08	0.0808	18.00	877.92	0.0208	0.257426
M.baccata_	B.juncea_c	25.00	273.83	0.0973	12.00	878.17	0.0138	0.141829
M.baccata_	B.umbellat	39.50	277.33	0.158	25.50	874.67	0.0297	0.187975
M.baccata_	F.hygromet	118.42	273	0.6477	92.58	879	0.1135	0.175235
M.baccata_	C.tinctori	18.00	275.17	0.0684	16.00	876.83	0.0185	0.270468
M.baccata_	S.miltiorr	38.00	274.17	0.1532	21.00	877.83	0.0243	0.158616
M.baccata_	C.sativa_c	13.00	274	0.049	11.00	878	0.0126	0.257143
M.baccata_	G.max_cob	16.00	275	0.0606	11.00	877	0.0126	0.207921
M.baccata_	D.hancocki	18.00	277.08	0.0679	23.00	874.92	0.0268	0.394698
M.baccata_	D.officina	17.00	277.42	0.0639	23.00	874.58	0.0268	0.419405
M.baccata_	D.huoshane	17.00	276.42	0.0642	24.00	875.58	0.0279	0.434579
V.vinifera	C.coggygri	10.00	276	0.0371	10.00	876	0.0115	0.309973
V.vinifera	O.fragrans	15.00	276.75	0.0563	17.00	875.25	0.0197	0.349911
V.vinifera	C.quinoa_c	25.00	275.5	0.0967	26.00	876.5	0.0303	0.31334
V.vinifera	C.japonica	16.00	276.17	0.0603	22.00	875.83	0.0255	0.422886
V.vinifera	B.juncea_c	15.00	275.92	0.0564	20.00	876.08	0.0232	0.411348
V.vinifera	B.umbellat	33.50	279.42	0.1306	21.50	872.58	0.0251	0.19219
V.vinifera	F.hygromet	108.92	275.08	0.563	98.08	876.92	0.1211	0.215098
V.vinifera	C.tinctori	13.00	277.25	0.0484	18.00	874.75	0.0209	0.431818
V.vinifera	S.miltiorr	35.00	276.25	0.1388	23.00	875.75	0.0267	0.192363
V.vinifera	C.sativa_c	10.00	276.08	0.0371	17.00	875.92	0.0197	0.530997
V.vinifera	G.max_cob	13.00	277.08	0.0484	9.00	874.92	0.0104	0.214876
V.vinifera	D.hancocki	12.00	279.17	0.0443	19.00	872.83	0.0221	0.498871
V.vinifera	D.officina	11.00	279.5	0.0404	19.00	872.5	0.0221	0.54703
V.vinifera	D.huoshane	11.00	278.5	0.0406	20.00	873.5	0.0233	0.573892
C.coggygri	O.fragrans	15.00	274.58	0.0567	13.00	877.42	0.015	0.26455
C.coggygri	C.quinoa_c	25.00	273.33	0.0975	22.00	878.67	0.0255	0.261538
C.coggygri	C.japonica	16.00	274	0.0608	14.00	878	0.0161	0.264803
C.coggygri	B.juncea_c	18.00	273.75	0.0688	10.00	878.25	0.0115	0.167151
C.coggygri	B.umbellat	34.50	277.25	0.1361	27.50	874.75	0.0321	0.235856
C.coggygri	F.hygromet	113.42	272.92	0.6057	91.58	879.08	0.1122	0.18524
C.coggygri	C.tinctori	12.00	275.08	0.0449	16.00	876.92	0.0185	0.412027
C.coggygri	S.miltiorr	34.00	274.08	0.1356	19.00	877.92	0.022	0.162242
C.coggygri	C.sativa_c	10.00	273.92	0.0374	13.00	878.08	0.015	0.40107
C.coggygri	G.max_cob	13.00	274.92	0.0488	7.00	877.08	0.008	0.163934
C.coggygri	D.hancocki	14.00	277	0.0523	21.00	875	0.0244	0.466539
C.coggygri	D.officina	13.00	277.33	0.0484	21.00	874.67	0.0244	0.504132
C.coggygri	D.huoshane	13.00	276.33	0.0486	20.00	875.67	0.0232	0.477366
O.fragrans	C.quinoa_c	27.00	274.08	0.1056	23.00	877.92	0.0267	0.252841
O.fragrans	C.japonica	17.00	274.75	0.0646	13.00	877.25	0.015	0.232198
O.fragrans	B.juncea_c	22.00	274.5	0.0848	13.00	877.5	0.015	0.176887
O.fragrans	B.umbellat	38.50	278	0.1531	20.50	874	0.0238	0.155454
O.fragrans	F.hygromet	110.17	273.67	0.5771	87.83	878.33	0.1073	0.18593
O.fragrans	C.tinctori	17.00	275.83	0.0643	15.00	876.17	0.0173	0.269051
O.fragrans	S.miltiorr	24.00	274.83	0.0928	8.00	877.17	0.0092	0.0991379
O.fragrans	C.sativa_c	15.50	274.67	0.0587	16.50	877.33	0.019	0.32368
O.fragrans	G.max_cob	17.00	275.67	0.0644	14.00	876.33	0.0161	0.25
O.fragrans	D.hancocki	19.00	277.75	0.0717	22.00	874.25	0.0256	0.357043
O.fragrans	D.officina	18.00	278.08	0.0677	22.00	873.92	0.0256	0.378139
O.fragrans	D.huoshane	18.00	277.08	0.0679	23.00	874.92	0.0268	0.394698
C.quinoa_c	C.japonica	29.00	273.5	0.1143	24.00	878.5	0.0278	0.24322
C.quinoa_c	B.juncea_c	29.50	273.25	0.1166	23.50	878.75	0.0272	0.233276
C.quinoa_c	B.umbellat	46.00	276.75	0.1879	33.00	875.25	0.0387	0.205961
C.quinoa_c	F.hygromet	112.92	272.42	0.6033	91.08	879.58	0.1114	0.184651
C.quinoa_c	C.tinctori	28.00	274.58	0.1096	25.00	877.42	0.029	0.264599
C.quinoa_c	S.miltiorr	45.17	273.58	0.1865	27.83	878.42	0.0324	0.173727
C.quinoa_c	C.sativa_c	25.00	273.42	0.0975	31.00	878.58	0.0361	0.370256
C.quinoa_c	G.max_cob	26.00	274.42	0.1013	22.00	877.58	0.0255	0.251728
C.quinoa_c	D.hancocki	28.50	276.5	0.1109	31.50	875.5	0.0369	0.332732
C.quinoa_c	D.officina	27.50	276.83	0.1066	31.50	875.17	0.0369	0.346154
C.quinoa_c	D.huoshane	27.50	275.83	0.107	32.50	876.17	0.038	0.35514
C.japonica	B.juncea_c	23.00	273.92	0.0891	16.00	878.08	0.0184	0.20651
C.japonica	B.umbellat	39.50	277.42	0.1579	26.50	874.58	0.0309	0.195693
C.japonica	F.hygromet	113.58	273.08	0.6065	84.42	878.92	0.1028	0.169497
C.japonica	C.tinctori	20.00	275.25	0.0764	17.00	876.75	0.0196	0.256545
C.japonica	S.miltiorr	35.00	274.25	0.1399	21.00	877.75	0.0243	0.173695
C.japonica	C.sativa_c	16.00	274.08	0.0608	25.00	877.92	0.029	0.476974
C.japonica	G.max_cob	17.00	275.08	0.0645	19.00	876.92	0.022	0.341085
C.japonica	D.hancocki	18.50	277.17	0.0699	25.50	874.83	0.0297	0.424893
C.japonica	D.officina	17.50	277.5	0.0659	27.50	874.5	0.0321	0.487102
C.japonica	D.huoshane	17.50	276.5	0.0661	24.50	875.5	0.0285	0.431165
B.juncea_c	B.umbellat	41.50	277.17	0.167	27.50	874.83	0.0321	0.192216
B.juncea_c	F.hygromet	107.42	272.83	0.5582	89.58	879.17	0.1095	0.196166
B.juncea_c	C.tinctori	22.00	275	0.0846	16.00	877	0.0185	0.218676
B.juncea_c	S.miltiorr	38.00	274	0.1533	19.00	878	0.022	0.143509
B.juncea_c	C.sativa_c	18.00	273.83	0.0688	17.00	878.17	0.0196	0.284884
B.juncea_c	G.max_cob	21.00	274.83	0.0806	17.00	877.17	0.0196	0.243176
B.juncea_c	D.hancocki	20.00	276.92	0.0759	25.00	875.08	0.0291	0.383399
B.juncea_c	D.officina	19.00	277.25	0.0719	25.00	874.75	0.0291	0.404729
B.juncea_c	D.huoshane	19.00	276.25	0.0721	24.00	875.75	0.0279	0.386963
B.umbellat	F.hygromet	115.92	276.33	0.6146	92.08	875.67	0.1133	0.184348
B.umbellat	C.tinctori	34.50	278.5	0.1354	24.50	873.5	0.0286	0.211226
B.umbellat	S.miltiorr	57.25	277.5	0.2413	27.75	874.5	0.0324	0.134273
B.umbellat	C.sativa_c	35.50	277.33	0.1404	27.50	874.67	0.0321	0.228632
B.umbellat	G.max_cob	35.50	278.33	0.1398	26.50	873.67	0.031	0.221745
B.umbellat	D.hancocki	26.50	280.42	0.101	23.50	871.58	0.0275	0.272277
B.umbellat	D.officina	27.50	280.75	0.105	23.50	871.25	0.0275	0.261905
B.umbellat	D.huoshane	27.50	279.75	0.1054	24.50	872.25	0.0286	0.271347
F.hygromet	C.tinctori	112.42	274.17	0.5934	89.58	877.83	0.1097	0.184867
F.hygromet	S.miltiorr	119.33	273.17	0.655	88.67	878.83	0.1084	0.165496
F.hygromet	C.sativa_c	112.58	273	0.5986	94.42	879	0.1159	0.193618
F.hygromet	G.max_cob	116.42	274	0.6269	94.58	878	0.1163	0.185516
F.hygromet	D.hancocki	108.42	276.08	0.5561	98.58	875.92	0.1219	0.219205
F.hygromet	D.officina	110.42	276.42	0.5704	96.58	875.58	0.1193	0.209151
F.hygromet	D.huoshane	109.42	275.42	0.5658	97.58	876.58	0.1205	0.212973
C.tinctori	S.miltiorr	35.67	275.33	0.1422	23.33	876.67	0.0271	0.190577
C.tinctori	C.sativa_c	13.00	275.17	0.0488	21.00	876.83	0.0243	0.497951
C.tinctori	G.max_cob	16.00	276.17	0.0603	19.00	875.83	0.022	0.364842
C.tinctori	D.hancocki	17.00	278.25	0.0637	23.00	873.75	0.0268	0.420722
C.tinctori	D.officina	16.00	278.58	0.0598	23.00	873.42	0.0268	0.448161
C.tinctori	D.huoshane	16.00	277.58	0.06	24.00	874.42	0.028	0.466667
S.miltiorr	C.sativa_c	33.50	274.17	0.1334	22.50	877.83	0.0261	0.195652
S.miltiorr	G.max_cob	38.00	275.17	0.1526	20.00	876.83	0.0232	0.152031
S.miltiorr	D.hancocki	37.00	277.25	0.147	29.00	874.75	0.0339	0.230612
S.miltiorr	D.officina	36.00	277.58	0.1424	29.00	874.42	0.0339	0.238062
S.miltiorr	D.huoshane	36.00	276.58	0.143	30.00	875.42	0.0351	0.245455
C.sativa_c	G.max_cob	11.00	275	0.0411	18.00	877	0.0208	0.506083
C.sativa_c	D.hancocki	14.00	277.08	0.0523	28.00	874.92	0.0327	0.625239
C.sativa_c	D.officina	13.00	277.42	0.0484	28.00	874.58	0.0327	0.67562
C.sativa_c	D.huoshane	13.00	276.42	0.0486	29.00	875.58	0.0339	0.697531
G.max_cob	D.hancocki	16.00	278.08	0.0599	22.00	873.92	0.0256	0.427379
G.max_cob	D.officina	15.00	278.42	0.0559	22.00	873.58	0.0256	0.457961
G.max_cob	D.huoshane	15.00	277.42	0.0561	23.00	874.58	0.0268	0.477718
D.hancocki	D.officina	1.00	280.5	0.0036	2.00	871.5	0.0023	0.638889
D.hancocki	D.huoshane	1.00	279.5	0.0036	1.00	872.5	0.0011	0.305556
D.officina	D.huoshane	0.00	279.83	0	3.00	872.17	0.0034	#DIV/0!

## Sheet: cox1
Seq 1	Seq 2	SynDif	SynPos	Ks	NSynDif	NSynPos	Ka	Ka/Ks
G.elata_co	A.thaliana	57.33	361.17	0.1784	44.67	1102.83	0.0416	0.233184
G.elata_co	Z.mays_cox	43.33	361.25	0.1307	42.67	1102.75	0.0397	0.303749
G.elata_co	G.biloba_c	67.83	361.75	0.2158	52.17	1102.25	0.0489	0.226599
G.elata_co	F.gracilis	43.83	363.67	0.1314	28.17	1100.33	0.026	0.197869
G.elata_co	C.sinensis	41.83	362.75	0.1252	27.17	1101.25	0.0251	0.200479
G.elata_co	C.taitunge	64.08	371.92	0.1958	65.92	1092.08	0.0629	0.321246
G.elata_co	P.nudum_co	144.58	364.42	0.5647	81.42	1099.58	0.078	0.138126
G.elata_co	O.sativa_c	42.33	361.58	0.1273	41.67	1102.42	0.0388	0.304792
G.elata_co	A.officina	28.33	361.67	0.0827	36.67	1102.33	0.034	0.411125
G.elata_co	M.baccata_	56.83	364	0.1751	26.17	1100	0.0242	0.138207
G.elata_co	V.vinifera	35.67	365.17	0.1046	27.33	1098.83	0.0253	0.241874
G.elata_co	C.coggygri	40.83	363	0.1219	27.17	1101	0.0251	0.205906
G.elata_co	O.fragrans	46.83	363.25	0.1415	26.17	1100.75	0.0242	0.171025
G.elata_co	C.quinoa_c	76.83	360.25	0.2509	42.17	1103.75	0.0392	0.156238
G.elata_co	C.japonica	53.33	363.08	0.1635	33.67	1100.92	0.0312	0.190826
G.elata_co	B.juncea_c	56.83	360.83	0.1768	45.17	1103.17	0.0421	0.238122
G.elata_co	B.umbellat	34.33	365.42	0.1004	20.67	1098.58	0.0191	0.190239
G.elata_co	F.hygromet	166	357.58	0.7237	76.00	1106.42	0.072	0.0994887
G.elata_co	C.tinctori	47.83	363.83	0.1445	24.17	1100.17	0.0223	0.154325
G.elata_co	S.miltiorr	54.83	362.83	0.1688	29.17	1101.17	0.027	0.159953
G.elata_co	C.sativa_c	44.83	360.75	0.1359	39.17	1103.25	0.0364	0.267844
G.elata_co	G.max_cox1	46.33	364.5	0.1393	33.67	1099.5	0.0313	0.224695
G.elata_co	D.hancocki	12.33	366.5	0.0344	11.67	1097.5	0.0107	0.311047
G.elata_co	D.officina	13.33	366.5	0.0373	11.67	1097.5	0.0107	0.286863
G.elata_co	D.huoshane	13.33	366.5	0.0373	11.67	1097.5	0.0107	0.286863
A.thaliana	Z.mays_cox	67.00	356.58	0.2163	15.00	1107.42	0.0137	0.063338
A.thaliana	G.biloba_c	61.00	357.08	0.1939	18.00	1106.92	0.0164	0.0845797
A.thaliana	F.gracilis	29.00	359	0.0855	20.00	1105	0.0183	0.214035
A.thaliana	C.sinensis	27.00	358.08	0.0795	22.00	1105.92	0.0202	0.254088
A.thaliana	C.taitunge	57.50	367.25	0.1756	72.50	1096.75	0.0692	0.394077
A.thaliana	P.nudum_co	142	359.75	0.5604	63.00	1104.25	0.0593	0.105817
A.thaliana	O.sativa_c	67.00	356.92	0.2161	14.00	1107.08	0.0128	0.0592318
A.thaliana	A.officina	50.00	357	0.155	13.00	1107	0.0118	0.076129
A.thaliana	M.baccata_	39.00	359.33	0.1172	20.00	1104.67	0.0183	0.156143
A.thaliana	V.vinifera	23.50	360.5	0.0682	34.50	1103.5	0.0319	0.467742
A.thaliana	C.coggygri	25.00	358.33	0.0732	22.00	1105.67	0.0202	0.275956
A.thaliana	O.fragrans	29.00	358.58	0.0856	21.00	1105.42	0.0192	0.224299
A.thaliana	C.quinoa_c	68.00	355.58	0.2208	8.00	1108.42	0.0073	0.0330616
A.thaliana	C.japonica	39.50	358.42	0.1192	27.50	1105.58	0.0253	0.212248
A.thaliana	B.juncea_c	6.00	356.17	0.017	0.00	1107.83	0	0
A.thaliana	B.umbellat	52.00	360.75	0.1601	31.00	1103.25	0.0286	0.178638
A.thaliana	F.hygromet	162.67	352.92	0.715	42.33	1111.08	0.0391	0.0546853
A.thaliana	C.tinctori	35.50	359.17	0.106	31.50	1104.83	0.0291	0.274528
A.thaliana	S.miltiorr	42.00	358.17	0.1275	18.00	1105.83	0.0165	0.129412
A.thaliana	C.sativa_c	28.00	356.08	0.0831	5.00	1107.92	0.0045	0.0541516
A.thaliana	G.max_cox1	31.50	359.83	0.0931	29.50	1104.17	0.0272	0.292159
A.thaliana	D.hancocki	47.50	361.83	0.1443	33.50	1102.17	0.031	0.21483
A.thaliana	D.officina	46.50	361.83	0.141	33.50	1102.17	0.031	0.219858
A.thaliana	D.huoshane	46.50	361.83	0.141	33.50	1102.17	0.031	0.219858
Z.mays_cox	G.biloba_c	76.50	357.17	0.2522	21.50	1106.83	0.0197	0.0781126
Z.mays_cox	F.gracilis	55.50	359.08	0.1731	19.50	1104.92	0.0179	0.103408
Z.mays_cox	C.sinensis	53.00	358.17	0.1648	19.00	1105.83	0.0174	0.105583
Z.mays_cox	C.taitunge	70.00	367.33	0.2199	73.00	1096.67	0.0697	0.316962
Z.mays_cox	P.nudum_co	152	359.83	0.6213	63.00	1104.17	0.0593	0.095445
Z.mays_cox	O.sativa_c	12.00	357	0.0344	1.00	1107	0.0009	0.0261628
Z.mays_cox	A.officina	35.00	357.08	0.105	15.00	1106.92	0.0137	0.130476
Z.mays_cox	M.baccata_	64.50	359.42	0.2051	19.50	1104.58	0.0179	0.0872745
Z.mays_cox	V.vinifera	48.33	360.58	0.1477	31.67	1103.42	0.0293	0.198375
Z.mays_cox	C.coggygri	51.00	358.42	0.1578	19.00	1105.58	0.0174	0.110266
Z.mays_cox	O.fragrans	56.00	358.67	0.1751	20.00	1105.33	0.0183	0.104512
Z.mays_cox	C.quinoa_c	85.00	355.67	0.2878	13.00	1108.33	0.0118	0.0410007
Z.mays_cox	C.japonica	65.00	358.5	0.2076	23.00	1105.5	0.0211	0.101638
Z.mays_cox	B.juncea_c	68.50	356.25	0.2222	15.50	1107.75	0.0141	0.0634563
Z.mays_cox	B.umbellat	39.00	360.83	0.1167	28.00	1103.17	0.0258	0.22108
Z.mays_cox	F.hygromet	166.67	353	0.7447	44.33	1111	0.041	0.0550557
Z.mays_cox	C.tinctori	59.00	359.25	0.1854	30.00	1104.75	0.0277	0.149407
Z.mays_cox	S.miltiorr	66.00	358.25	0.2114	17.00	1105.75	0.0155	0.0733207
Z.mays_cox	C.sativa_c	55.00	356.17	0.1729	10.00	1107.83	0.0091	0.0526316
Z.mays_cox	G.max_cox1	53.50	359.92	0.1657	24.50	1104.08	0.0225	0.135788
Z.mays_cox	D.hancocki	33.00	361.92	0.0972	31.00	1102.08	0.0287	0.295267
Z.mays_cox	D.officina	32.00	361.92	0.0941	31.00	1102.08	0.0287	0.304995
Z.mays_cox	D.huoshane	32.00	361.92	0.0941	31.00	1102.08	0.0287	0.304995
G.biloba_c	F.gracilis	50.50	359.58	0.1555	28.50	1104.42	0.0263	0.169132
G.biloba_c	C.sinensis	52.00	358.67	0.1611	29.00	1105.33	0.0267	0.165736
G.biloba_c	C.taitunge	30.50	367.83	0.0879	63.50	1096.17	0.0603	0.686007
G.biloba_c	P.nudum_co	123.67	360.33	0.4588	59.33	1103.67	0.0558	0.121622
G.biloba_c	O.sativa_c	78.50	357.5	0.2598	20.50	1106.5	0.0188	0.0723634
G.biloba_c	A.officina	59.50	357.58	0.1881	21.50	1106.42	0.0197	0.104732
G.biloba_c	M.baccata_	59.50	359.92	0.1868	28.50	1104.08	0.0263	0.140792
G.biloba_c	V.vinifera	49.00	361.08	0.1497	41.00	1102.92	0.0381	0.254509
G.biloba_c	C.coggygri	50.50	358.92	0.1558	28.50	1105.08	0.0262	0.168164
G.biloba_c	O.fragrans	56.50	359.17	0.1765	27.50	1104.83	0.0253	0.143343
G.biloba_c	C.quinoa_c	81.50	356.17	0.273	16.50	1107.83	0.015	0.0549451
G.biloba_c	C.japonica	64.00	359	0.2036	34.00	1105	0.0314	0.154224
G.biloba_c	B.juncea_c	56.50	356.75	0.1779	17.50	1107.25	0.016	0.0899382
G.biloba_c	B.umbellat	66.50	361.33	0.2112	37.50	1102.67	0.0348	0.164773
G.biloba_c	F.hygromet	158.42	353.5	0.6826	40.58	1110.5	0.0375	0.054937
G.biloba_c	C.tinctori	55.00	359.75	0.171	38.00	1104.25	0.0352	0.205848
G.biloba_c	S.miltiorr	67.00	358.75	0.2148	25.00	1105.25	0.023	0.107076
G.biloba_c	C.sativa_c	53.50	356.67	0.1674	13.50	1107.33	0.0123	0.0734767
G.biloba_c	G.max_cox1	59.00	360.42	0.1847	38.00	1103.58	0.0352	0.190579
G.biloba_c	D.hancocki	59.00	362.42	0.1835	41.00	1101.58	0.0382	0.208174
G.biloba_c	D.officina	58.00	362.42	0.18	41.00	1101.58	0.0382	0.212222
G.biloba_c	D.huoshane	58.00	362.42	0.18	41.00	1101.58	0.0382	0.212222
F.gracilis	C.sinensis	12.00	360.58	0.034	8.00	1103.42	0.0073	0.214706
F.gracilis	C.taitunge	46.50	369.75	0.1377	61.50	1094.25	0.0584	0.42411
F.gracilis	P.nudum_co	138.5	362.25	0.5347	62.50	1101.75	0.059	0.110342
F.gracilis	O.sativa_c	56.00	359.42	0.1747	18.00	1104.58	0.0165	0.0944476
F.gracilis	A.officina	40.00	359.5	0.1204	16.00	1104.5	0.0146	0.121262
F.gracilis	M.baccata_	25.00	361.83	0.0725	4.00	1102.17	0.0036	0.0496552
F.gracilis	V.vinifera	11.00	363	0.0309	16.00	1101	0.0147	0.475728
F.gracilis	C.coggygri	10.00	360.83	0.0282	8.00	1103.17	0.0073	0.258865
F.gracilis	O.fragrans	21.00	361.08	0.0605	9.00	1102.92	0.0082	0.135537
F.gracilis	C.quinoa_c	45.50	358.08	0.1392	17.50	1105.92	0.016	0.114943
F.gracilis	C.japonica	29.50	360.92	0.0865	16.50	1103.08	0.0151	0.174566
F.gracilis	B.juncea_c	30.50	358.67	0.0903	20.50	1105.33	0.0188	0.208195
F.gracilis	B.umbellat	43.00	363.25	0.1288	17.00	1100.75	0.0156	0.121118
F.gracilis	F.hygromet	158.67	355.42	0.6783	53.33	1108.58	0.0497	0.0732714
F.gracilis	C.tinctori	23.00	361.67	0.0665	15.00	1102.33	0.0137	0.206015
F.gracilis	S.miltiorr	34.00	360.67	0.1007	8.00	1103.33	0.0073	0.0724926
F.gracilis	C.sativa_c	16.00	358.58	0.046	15.00	1105.42	0.0137	0.297826
F.gracilis	G.max_cox1	21.50	362.33	0.0618	11.50	1101.67	0.0105	0.169903
F.gracilis	D.hancocki	35.00	364.33	0.1028	17.00	1099.67	0.0156	0.151751
F.gracilis	D.officina	34.00	364.33	0.0997	17.00	1099.67	0.0156	0.156469
F.gracilis	D.huoshane	34.00	364.33	0.0997	17.00	1099.67	0.0156	0.156469
C.sinensis	C.taitunge	48.00	368.83	0.1429	60.00	1095.17	0.0569	0.398181
C.sinensis	P.nudum_co	141	361.33	0.5509	67.00	1102.67	0.0634	0.115084
C.sinensis	O.sativa_c	53.00	358.5	0.1647	18.00	1105.5	0.0165	0.100182
C.sinensis	A.officina	38.00	358.58	0.1142	18.00	1105.42	0.0165	0.144483
C.sinensis	M.baccata_	23.00	360.92	0.0666	8.00	1103.08	0.0073	0.10961
C.sinensis	V.vinifera	9.00	362.08	0.0253	14.00	1101.92	0.0128	0.505929
C.sinensis	C.coggygri	8.00	359.92	0.0226	0.00	1104.08	0	0
C.sinensis	O.fragrans	20.00	360.17	0.0577	5.00	1103.83	0.0045	0.0779896
C.sinensis	C.quinoa_c	50.00	357.17	0.1549	19.00	1106.83	0.0174	0.112331
C.sinensis	C.japonica	28.50	360	0.0837	12.50	1104	0.0114	0.136201
C.sinensis	B.juncea_c	28.50	357.75	0.0842	22.50	1106.25	0.0206	0.244656
C.sinensis	B.umbellat	41.00	362.33	0.1227	15.00	1101.67	0.0137	0.111654
C.sinensis	F.hygromet	159.17	354.5	0.6847	55.83	1109.5	0.0521	0.0760917
C.sinensis	C.tinctori	21.00	360.75	0.0606	11.00	1103.25	0.01	0.165017
C.sinensis	S.miltiorr	32.00	359.75	0.0947	6.00	1104.25	0.0055	0.0580781
C.sinensis	C.sativa_c	14.00	357.67	0.0402	17.00	1106.33	0.0155	0.385572
C.sinensis	G.max_cox1	19.50	361.42	0.056	13.50	1102.58	0.0123	0.219643
C.sinensis	D.hancocki	33.00	363.42	0.0968	16.00	1100.58	0.0147	0.15186
C.sinensis	D.officina	32.00	363.42	0.0937	16.00	1100.58	0.0147	0.156884
C.sinensis	D.huoshane	32.00	363.42	0.0937	16.00	1100.58	0.0147	0.156884
C.taitunge	P.nudum_co	122.33	370.5	0.4352	86.67	1093.5	0.0838	0.192555
C.taitunge	O.sativa_c	71.50	367.67	0.2251	71.50	1096.33	0.0682	0.302976
C.taitunge	A.officina	55.00	367.75	0.1668	70.00	1096.25	0.0667	0.39988
C.taitunge	M.baccata_	52.50	370.08	0.1573	63.50	1093.92	0.0604	0.38398
C.taitunge	V.vinifera	45.00	371.25	0.1322	62.00	1092.75	0.059	0.446293
C.taitunge	C.coggygri	46.50	369.08	0.1379	59.50	1094.92	0.0564	0.408992
C.taitunge	O.fragrans	55.50	369.33	0.1677	62.50	1094.67	0.0594	0.354204
C.taitunge	C.quinoa_c	81.50	366.33	0.2639	71.50	1097.67	0.0681	0.258052
C.taitunge	C.japonica	60.50	369.17	0.1849	70.50	1094.83	0.0673	0.363981
C.taitunge	B.juncea_c	55.00	366.92	0.1672	72.00	1097.08	0.0687	0.410885
C.taitunge	B.umbellat	61.50	371.5	0.187	62.50	1092.5	0.0595	0.318182
C.taitunge	F.hygromet	154.58	363.67	0.6273	95.42	1100.33	0.0922	0.146979
C.taitunge	C.tinctori	53.00	369.92	0.159	61.00	1094.08	0.0579	0.364151
C.taitunge	S.miltiorr	66.00	368.92	0.2044	64.00	1095.08	0.0608	0.297456
C.taitunge	C.sativa_c	49.50	366.83	0.1488	68.50	1097.17	0.0652	0.438172
C.taitunge	G.max_cox1	53.50	370.58	0.1603	69.50	1093.42	0.0664	0.414223
C.taitunge	D.hancocki	53.00	372.58	0.1577	56.00	1091.42	0.0531	0.336715
C.taitunge	D.officina	52.00	372.58	0.1544	56.00	1091.42	0.0531	0.343912
C.taitunge	D.huoshane	52.00	372.58	0.1544	56.00	1091.42	0.0531	0.343912
P.nudum_co	O.sativa_c	152	360.17	0.6204	62.00	1103.83	0.0584	0.0941328
P.nudum_co	A.officina	144	360.25	0.571	60.00	1103.75	0.0564	0.0987741
P.nudum_co	M.baccata_	143	362.58	0.5597	62.00	1101.42	0.0585	0.10452
P.nudum_co	V.vinifera	135	363.75	0.5122	75.00	1100.25	0.0715	0.139594
P.nudum_co	C.coggygri	136.5	361.58	0.5249	66.50	1102.42	0.0629	0.119832
P.nudum_co	O.fragrans	142.5	361.83	0.5585	63.50	1102.17	0.0599	0.107252
P.nudum_co	C.quinoa_c	162	358.83	0.6909	61.00	1105.17	0.0573	0.0829353
P.nudum_co	C.japonica	147	361.67	0.5856	73.00	1102.33	0.0693	0.11834
P.nudum_co	B.juncea_c	138.5	359.42	0.5408	63.50	1104.58	0.0598	0.110577
P.nudum_co	B.umbellat	148.5	364	0.5889	66.50	1100	0.063	0.106979
P.nudum_co	F.hygromet	144.5	356.17	0.5839	61.50	1107.83	0.0577	0.0988183
P.nudum_co	C.tinctori	143	362.42	0.5601	74.00	1101.58	0.0704	0.125692
P.nudum_co	S.miltiorr	152	361.42	0.617	63.00	1102.58	0.0594	0.0962723
P.nudum_co	C.sativa_c	137.5	359.33	0.5353	57.50	1104.67	0.0539	0.100691
P.nudum_co	G.max_cox1	144	363.08	0.5644	71.00	1100.92	0.0674	0.119419
P.nudum_co	D.hancocki	143.5	365.08	0.5569	70.50	1098.92	0.0671	0.120488
P.nudum_co	D.officina	144.5	365.08	0.5627	70.50	1098.92	0.0671	0.119246
P.nudum_co	D.huoshane	144.5	365.08	0.5627	70.50	1098.92	0.0671	0.119246
O.sativa_c	A.officina	34.00	357.42	0.1017	14.00	1106.58	0.0128	0.12586
O.sativa_c	M.baccata_	64.50	359.75	0.2049	18.50	1104.25	0.0169	0.0824793
O.sativa_c	V.vinifera	48.83	360.92	0.1492	30.17	1103.08	0.0279	0.186997
O.sativa_c	C.coggygri	51.00	358.75	0.1576	18.00	1105.25	0.0165	0.104695
O.sativa_c	O.fragrans	54.00	359	0.1679	19.00	1105	0.0174	0.103633
O.sativa_c	C.quinoa_c	88.00	356	0.2999	12.00	1108	0.0109	0.0363454
O.sativa_c	C.japonica	63.00	358.83	0.2	22.00	1105.17	0.0202	0.101
O.sativa_c	B.juncea_c	68.50	356.58	0.2219	14.50	1107.42	0.0132	0.0594863
O.sativa_c	B.umbellat	40.00	361.17	0.1198	27.00	1102.83	0.0249	0.207846
O.sativa_c	F.hygromet	167.17	353.33	0.7473	43.83	1110.67	0.0405	0.0541951
O.sativa_c	C.tinctori	59.00	359.58	0.1852	29.00	1104.42	0.0267	0.144168
O.sativa_c	S.miltiorr	65.00	358.58	0.2075	16.00	1105.42	0.0146	0.0703614
O.sativa_c	C.sativa_c	53.00	356.5	0.1657	9.00	1107.5	0.0082	0.049487
O.sativa_c	G.max_cox1	53.00	360.25	0.1638	23.00	1103.75	0.0211	0.128816
O.sativa_c	D.hancocki	32.00	362.25	0.094	30.00	1101.75	0.0277	0.294681
O.sativa_c	D.officina	31.00	362.25	0.0909	30.00	1101.75	0.0277	0.30473
O.sativa_c	D.huoshane	31.00	362.25	0.0909	30.00	1101.75	0.0277	0.30473
A.officina	M.baccata_	52.50	359.83	0.1623	16.50	1104.17	0.0151	0.0930376
A.officina	V.vinifera	32.83	361	0.097	28.17	1103	0.026	0.268041
A.officina	C.coggygri	34.00	358.83	0.1013	18.00	1105.17	0.0165	0.162883
A.officina	O.fragrans	44.00	359.08	0.1338	15.00	1104.92	0.0137	0.102392
A.officina	C.quinoa_c	70.00	356.08	0.228	10.00	1107.92	0.0091	0.0399123
A.officina	C.japonica	50.50	358.92	0.1558	21.50	1105.08	0.0197	0.126444
A.officina	B.juncea_c	51.50	356.67	0.1604	13.50	1107.33	0.0123	0.0766833
A.officina	B.umbellat	26.00	361.25	0.0757	23.00	1102.75	0.0212	0.280053
A.officina	F.hygromet	161.67	353.42	0.7061	42.33	1110.58	0.0391	0.0553746
A.officina	C.tinctori	45.00	359.67	0.1369	25.00	1104.33	0.023	0.168006
A.officina	S.miltiorr	54.00	358.67	0.1681	16.00	1105.33	0.0146	0.0868531
A.officina	C.sativa_c	40.00	356.58	0.1215	7.00	1107.42	0.0063	0.0518519
A.officina	G.max_cox1	40.50	360.33	0.1218	22.50	1103.67	0.0207	0.169951
A.officina	D.hancocki	16.00	362.33	0.0455	25.00	1101.67	0.023	0.505495
A.officina	D.officina	15.00	362.33	0.0426	25.00	1101.67	0.023	0.539906
A.officina	D.huoshane	15.00	362.33	0.0426	25.00	1101.67	0.023	0.539906
M.baccata_	V.vinifera	24.00	363.33	0.0691	16.00	1100.67	0.0147	0.212735
M.baccata_	C.coggygri	25.00	361.17	0.0726	8.00	1102.83	0.0073	0.100551
M.baccata_	O.fragrans	32.00	361.42	0.0942	9.00	1102.58	0.0082	0.0870488
M.baccata_	C.quinoa_c	60.00	358.42	0.1894	17.00	1105.58	0.0155	0.0818374
M.baccata_	C.japonica	36.50	361.25	0.1085	16.50	1102.75	0.0151	0.139171
M.baccata_	B.juncea_c	42.50	359	0.1288	20.50	1105	0.0188	0.145963
M.baccata_	B.umbellat	53.50	363.58	0.1638	17.50	1100.42	0.0161	0.0982906
M.baccata_	F.hygromet	165.67	355.75	0.7275	51.33	1108.25	0.0478	0.0657045
M.baccata_	C.tinctori	34.00	362	0.1003	17.00	1102	0.0156	0.155533
M.baccata_	S.miltiorr	45.00	361	0.1363	8.00	1103	0.0073	0.0535583
M.baccata_	C.sativa_c	27.00	358.92	0.0793	15.00	1105.08	0.0137	0.172762
M.baccata_	G.max_cox1	32.50	362.67	0.0954	13.50	1101.33	0.0124	0.129979
M.baccata_	D.hancocki	47.50	364.67	0.1431	17.50	1099.33	0.0161	0.112509
M.baccata_	D.officina	46.50	364.67	0.1398	17.50	1099.33	0.0161	0.115165
M.baccata_	D.huoshane	46.50	364.67	0.1398	17.50	1099.33	0.0161	0.115165
V.vinifera	C.coggygri	7.00	362.33	0.0196	14.00	1101.67	0.0128	0.653061
V.vinifera	O.fragrans	17.00	362.58	0.0484	17.00	1101.42	0.0156	0.322314
V.vinifera	C.quinoa_c	47.50	359.58	0.1453	32.50	1104.42	0.03	0.206469
V.vinifera	C.japonica	23.50	362.42	0.0678	22.50	1101.58	0.0207	0.30531
V.vinifera	B.juncea_c	25.00	360.17	0.0728	35.00	1103.83	0.0324	0.445055
V.vinifera	B.umbellat	35.83	364.75	0.1053	19.17	1099.25	0.0176	0.167142
V.vinifera	F.hygromet	159.67	356.92	0.6806	67.33	1107.08	0.0634	0.0931531
V.vinifera	C.tinctori	18.00	363.17	0.0513	15.00	1100.83	0.0138	0.269006
V.vinifera	S.miltiorr	28.00	362.17	0.0816	18.00	1101.83	0.0165	0.202206
V.vinifera	C.sativa_c	11.00	360.08	0.0312	29.00	1103.92	0.0267	0.855769
V.vinifera	G.max_cox1	16.50	363.83	0.0468	19.50	1100.17	0.0179	0.382479
V.vinifera	D.hancocki	27.83	365.83	0.0802	16.17	1098.17	0.0149	0.185786
V.vinifera	D.officina	26.83	365.83	0.0772	16.17	1098.17	0.0149	0.193005
V.vinifera	D.huoshane	26.83	365.83	0.0772	16.17	1098.17	0.0149	0.193005
C.coggygri	O.fragrans	18.00	360.42	0.0517	5.00	1103.58	0.0045	0.0870406
C.coggygri	C.quinoa_c	50.00	357.42	0.1548	19.00	1106.58	0.0174	0.112403
C.coggygri	C.japonica	24.50	360.25	0.0713	12.50	1103.75	0.0114	0.159888
C.coggygri	B.juncea_c	26.50	358	0.0779	22.50	1106	0.0206	0.264442
C.coggygri	B.umbellat	39.00	362.58	0.1161	15.00	1101.42	0.0137	0.118002
C.coggygri	F.hygromet	157.67	354.75	0.6735	55.33	1109.25	0.0516	0.0766147
C.coggygri	C.tinctori	19.00	361	0.0546	11.00	1103	0.01	0.18315
C.coggygri	S.miltiorr	31.00	360	0.0915	6.00	1104	0.0055	0.0601093
C.coggygri	C.sativa_c	12.00	357.92	0.0343	17.00	1106.08	0.0155	0.451895
C.coggygri	G.max_cox1	17.50	361.67	0.05	13.50	1102.33	0.0123	0.246
C.coggygri	D.hancocki	31.00	363.67	0.0905	16.00	1100.33	0.0147	0.162431
C.coggygri	D.officina	30.00	363.67	0.0874	16.00	1100.33	0.0147	0.168192
C.coggygri	D.huoshane	30.00	363.67	0.0874	16.00	1100.33	0.0147	0.168192
O.fragrans	C.quinoa_c	58.00	357.67	0.1827	18.00	1106.33	0.0164	0.0897646
O.fragrans	C.japonica	20.50	360.5	0.0591	11.50	1103.5	0.0105	0.177665
O.fragrans	B.juncea_c	28.50	358.25	0.0841	21.50	1105.75	0.0197	0.234245
O.fragrans	B.umbellat	47.00	362.83	0.1422	14.00	1101.17	0.0128	0.0900141
O.fragrans	F.hygromet	156.67	355	0.6658	53.33	1109	0.0497	0.074647
O.fragrans	C.tinctori	21.00	361.25	0.0605	10.00	1102.75	0.0091	0.150413
O.fragrans	S.miltiorr	16.00	360.25	0.0458	3.00	1103.75	0.0027	0.058952
O.fragrans	C.sativa_c	18.00	358.17	0.052	16.00	1105.83	0.0146	0.280769
O.fragrans	G.max_cox1	26.50	361.92	0.077	14.50	1102.08	0.0133	0.172727
O.fragrans	D.hancocki	39.00	363.92	0.1156	15.00	1100.08	0.0138	0.119377
O.fragrans	D.officina	38.00	363.92	0.1124	15.00	1100.08	0.0138	0.122776
O.fragrans	D.huoshane	38.00	363.92	0.1124	15.00	1100.08	0.0138	0.122776
C.quinoa_c	C.japonica	60.50	357.5	0.1918	23.50	1106.5	0.0215	0.112096
C.quinoa_c	B.juncea_c	67.50	355.25	0.2191	8.50	1108.75	0.0077	0.0351438
C.quinoa_c	B.umbellat	78.00	359.83	0.2558	29.00	1104.17	0.0267	0.104378
C.quinoa_c	F.hygromet	168.67	352	0.7639	37.33	1112	0.0343	0.0449012
C.quinoa_c	C.tinctori	55.00	358.25	0.1718	28.00	1105.75	0.0258	0.150175
C.quinoa_c	S.miltiorr	68.00	357.25	0.2196	15.00	1106.75	0.0137	0.0623862
C.quinoa_c	C.sativa_c	55.00	355.17	0.1735	2.00	1108.83	0.0018	0.0103746
C.quinoa_c	G.max_cox1	56.00	358.92	0.1749	27.00	1105.08	0.0248	0.141795
C.quinoa_c	D.hancocki	73.00	360.92	0.2357	31.00	1103.08	0.0286	0.121341
C.quinoa_c	D.officina	72.00	360.92	0.2319	31.00	1103.08	0.0286	0.123329
C.quinoa_c	D.huoshane	72.00	360.92	0.2319	31.00	1103.08	0.0286	0.123329
C.japonica	B.juncea_c	40.00	358.08	0.121	28.00	1105.92	0.0258	0.213223
C.japonica	B.umbellat	55.50	362.67	0.1712	21.50	1101.33	0.0198	0.115654
C.japonica	F.hygromet	162.17	354.83	0.705	57.83	1109.17	0.054	0.0765957
C.japonica	C.tinctori	28.50	361.08	0.0834	17.50	1102.92	0.016	0.191847
C.japonica	S.miltiorr	30.50	360.08	0.0899	10.50	1103.92	0.0096	0.106785
C.japonica	C.sativa_c	27.50	358	0.081	21.50	1106	0.0197	0.24321
C.japonica	G.max_cox1	31.00	361.75	0.091	9.00	1102.25	0.0082	0.0901099
C.japonica	D.hancocki	47.50	363.75	0.1435	22.50	1100.25	0.0207	0.144251
C.japonica	D.officina	46.50	363.75	0.1402	22.50	1100.25	0.0207	0.147646
C.japonica	D.huoshane	46.50	363.75	0.1402	22.50	1100.25	0.0207	0.147646
B.juncea_c	B.umbellat	53.50	360.42	0.1654	31.50	1103.58	0.0291	0.175937
B.juncea_c	F.hygromet	159.17	352.58	0.6908	42.83	1111.42	0.0396	0.0573248
B.juncea_c	C.tinctori	35.00	358.83	0.1045	32.00	1105.17	0.0295	0.282297
B.juncea_c	S.miltiorr	42.50	357.83	0.1293	18.50	1106.17	0.0169	0.130704
B.juncea_c	C.sativa_c	29.50	355.75	0.0879	5.50	1108.25	0.005	0.0568828
B.juncea_c	G.max_cox1	32.00	359.5	0.0948	31.00	1104.5	0.0286	0.301688
B.juncea_c	D.hancocki	49.00	361.5	0.1495	34.00	1102.5	0.0315	0.210702
B.juncea_c	D.officina	48.00	361.5	0.1461	34.00	1102.5	0.0315	0.215606
B.juncea_c	D.huoshane	48.00	361.5	0.1461	34.00	1102.5	0.0315	0.215606
B.umbellat	F.hygromet	161.67	357.17	0.6938	63.33	1106.83	0.0595	0.0857596
B.umbellat	C.tinctori	48.00	363.42	0.1453	16.00	1100.58	0.0147	0.10117
B.umbellat	S.miltiorr	57.00	362.42	0.1765	17.00	1101.58	0.0156	0.0883853
B.umbellat	C.sativa_c	43.00	360.33	0.13	26.00	1103.67	0.0239	0.183846
B.umbellat	G.max_cox1	44.50	364.08	0.1334	22.50	1099.92	0.0207	0.155172
B.umbellat	D.hancocki	22.00	366.08	0.0626	9.00	1097.92	0.0082	0.13099
B.umbellat	D.officina	21.00	366.08	0.0597	9.00	1097.92	0.0082	0.137353
B.umbellat	D.huoshane	21.00	366.08	0.0597	9.00	1097.92	0.0082	0.137353
F.hygromet	C.tinctori	161.17	355.58	0.6954	63.83	1108.42	0.0599	0.0861375
F.hygromet	S.miltiorr	161.17	354.58	0.6986	50.83	1109.42	0.0473	0.0677068
F.hygromet	C.sativa_c	160.17	352.5	0.6982	36.83	1111.5	0.0339	0.0485534
F.hygromet	G.max_cox1	168.17	356.25	0.7445	61.83	1107.75	0.058	0.0779046
F.hygromet	D.hancocki	166.17	358.25	0.7226	65.83	1105.75	0.062	0.0858013
F.hygromet	D.officina	167.17	358.25	0.73	65.83	1105.75	0.062	0.0849315
F.hygromet	D.huoshane	167.17	358.25	0.73	65.83	1105.75	0.062	0.0849315
C.tinctori	S.miltiorr	35.00	360.83	0.1039	13.00	1103.17	0.0119	0.114533
C.tinctori	C.sativa_c	22.00	358.75	0.064	26.00	1105.25	0.0239	0.373437
C.tinctori	G.max_cox1	27.50	362.5	0.08	22.50	1101.5	0.0207	0.25875
C.tinctori	D.hancocki	40.00	364.5	0.1186	13.00	1099.5	0.0119	0.100337
C.tinctori	D.officina	39.00	364.5	0.1154	13.00	1099.5	0.0119	0.10312
C.tinctori	D.huoshane	39.00	364.5	0.1154	13.00	1099.5	0.0119	0.10312
S.miltiorr	C.sativa_c	33.00	357.75	0.0984	13.00	1106.25	0.0118	0.119919
S.miltiorr	G.max_cox1	40.50	361.5	0.1213	15.50	1102.5	0.0142	0.117065
S.miltiorr	D.hancocki	50.00	363.5	0.152	18.00	1100.5	0.0165	0.108553
S.miltiorr	D.officina	49.00	363.5	0.1486	18.00	1100.5	0.0165	0.111036
S.miltiorr	D.huoshane	49.00	363.5	0.1486	18.00	1100.5	0.0165	0.111036
C.sativa_c	G.max_cox1	20.50	359.42	0.0593	24.50	1104.58	0.0225	0.379427
C.sativa_c	D.hancocki	35.00	361.42	0.1037	28.00	1102.58	0.0258	0.248795
C.sativa_c	D.officina	34.00	361.42	0.1005	28.00	1102.58	0.0258	0.256716
C.sativa_c	D.huoshane	34.00	361.42	0.1005	28.00	1102.58	0.0258	0.256716
G.max_cox1	D.hancocki	36.50	365.17	0.1073	22.50	1098.83	0.0208	0.193849
G.max_cox1	D.officina	35.50	365.17	0.1041	22.50	1098.83	0.0208	0.199808
G.max_cox1	D.huoshane	35.50	365.17	0.1041	22.50	1098.83	0.0208	0.199808
D.hancocki	D.officina	1.00	367.17	0.0027	0.00	1096.83	0	0
D.hancocki	D.huoshane	1.00	367.17	0.0027	0.00	1096.83	0	0
D.officina	D.huoshane	0.00	367.17	0	0.00	1096.83	0	#DIV/0!

## Sheet: cox2
Seq 1	Seq 2	SynDif	SynPos	Ks	NSynDif	NSynPos	Ka	KA/KS
G.elata_co	A.thaliana	21.50	134.58	0.1796	43.50	435.42	0.1072	0.596882
G.elata_co	Z.mays_cox	22.50	134.92	0.1886	36.50	435.08	0.089	0.471898
G.elata_co	G.biloba_c	31.00	137.33	0.2685	54.00	432.67	0.1365	0.50838
G.elata_co	F.gracilis	21.50	135.42	0.1784	37.50	434.58	0.0917	0.514013
G.elata_co	C.sinensis	21.50	135.25	0.1786	37.50	434.75	0.0916	0.512878
G.elata_co	C.taitunge	29.50	136.33	0.2553	41.50	433.67	0.1024	0.401097
G.elata_co	P.nudum_co	38.83	135	0.3628	71.17	435	0.1846	0.50882
G.elata_co	O.sativa_c	22.50	134.92	0.1886	37.50	435.08	0.0916	0.485684
G.elata_co	A.officina	19.00	134.83	0.1561	31.00	435.17	0.0749	0.479821
G.elata_co	M.baccata_	24.50	134.92	0.2079	38.50	435.08	0.0942	0.453102
G.elata_co	V.vinifera	21.50	135.75	0.1779	38.50	434.25	0.0944	0.530635
G.elata_co	C.coggygri	21.50	135.58	0.1782	38.50	434.42	0.0943	0.529181
G.elata_co	O.fragrans	21.67	133.25	0.1833	46.33	436.75	0.1144	0.624113
G.elata_co	C.quinoa_c	23.33	135.5	0.1956	41.67	434.5	0.1026	0.52454
G.elata_co	C.japonica	21.17	134.08	0.1773	47.83	435.92	0.1186	0.668923
G.elata_co	B.juncea_c	21.50	134.08	0.1804	44.50	435.92	0.1097	0.608093
G.elata_co	B.umbellat	28.00	135.58	0.2416	39.00	434.42	0.0956	0.395695
G.elata_co	F.hygromet	42.17	131.83	0.417	56.83	438.17	0.1424	0.341487
G.elata_co	C.tinctori	24.50	134.58	0.2085	40.50	435.42	0.0993	0.476259
G.elata_co	S.miltiorr	23.00	133.08	0.1964	44.00	436.92	0.1081	0.550407
G.elata_co	C.sativa_c	26.50	133.33	0.2309	46.50	436.67	0.1149	0.497618
G.elata_co	G.max_cox2	20.50	134.75	0.17	37.50	435.25	0.0915	0.538235
G.elata_co	D.hancocki	13.00	136.25	0.1021	28.00	433.75	0.0675	0.661117
G.elata_co	D.officina	12.50	135.17	0.0987	26.50	434.83	0.0636	0.644377
G.elata_co	D.huoshane	12.50	135.17	0.0987	26.50	434.83	0.0636	0.644377
A.thaliana	Z.mays_cox	14.00	136.5	0.1103	30.00	433.5	0.0726	0.658205
A.thaliana	G.biloba_c	21.00	138.92	0.1688	36.00	431.08	0.0885	0.524289
A.thaliana	F.gracilis	7.00	137	0.0529	6.00	433	0.014	0.26465
A.thaliana	C.sinensis	8.00	136.83	0.0609	6.00	433.17	0.014	0.229885
A.thaliana	C.taitunge	31.17	137.92	0.2689	39.83	432.08	0.0984	0.365935
A.thaliana	P.nudum_co	30.83	136.58	0.2686	48.17	433.42	0.1203	0.447878
A.thaliana	O.sativa_c	14.00	136.5	0.1103	31.00	433.5	0.0752	0.681777
A.thaliana	A.officina	11.50	136.42	0.0894	19.50	433.58	0.0464	0.519016
A.thaliana	M.baccata_	10.50	136.5	0.0812	8.50	433.5	0.0199	0.245074
A.thaliana	V.vinifera	6.00	137.33	0.045	13.00	432.67	0.0307	0.682222
A.thaliana	C.coggygri	6.00	137.17	0.0451	5.00	432.83	0.0116	0.257206
A.thaliana	O.fragrans	9.00	134.83	0.0699	16.00	435.17	0.0377	0.539342
A.thaliana	C.quinoa_c	18.00	137.08	0.1443	31.00	432.92	0.0753	0.52183
A.thaliana	C.japonica	10.67	135.67	0.0831	24.33	434.33	0.0582	0.700361
A.thaliana	B.juncea_c	0.00	135.67	0	3.00	434.33	0.0069	#DIV/0!
A.thaliana	B.umbellat	24.50	137.17	0.204	45.50	432.83	0.1133	0.555392
A.thaliana	F.hygromet	35.00	133.42	0.3228	36.00	436.58	0.0874	0.270756
A.thaliana	C.tinctori	6.00	136.17	0.0454	15.00	433.83	0.0354	0.779736
A.thaliana	S.miltiorr	11.00	134.67	0.0865	16.00	435.33	0.0377	0.435838
A.thaliana	C.sativa_c	12.50	134.92	0.0989	10.50	435.08	0.0245	0.247725
A.thaliana	G.max_cox2	8.00	136.33	0.0611	9.00	433.67	0.021	0.343699
A.thaliana	D.hancocki	18.50	137.83	0.1479	39.50	432.17	0.0975	0.659229
A.thaliana	D.officina	10.00	136.75	0.0769	23.00	433.25	0.0551	0.716515
A.thaliana	D.huoshane	10.00	136.75	0.0769	23.00	433.25	0.0551	0.716515
Z.mays_cox	G.biloba_c	24.50	139.25	0.2005	34.50	430.75	0.0847	0.422444
Z.mays_cox	F.gracilis	14.00	137.33	0.1096	24.00	432.67	0.0576	0.525547
Z.mays_cox	C.sinensis	16.00	137.17	0.1268	24.00	432.83	0.0576	0.454259
Z.mays_cox	C.taitunge	33.00	138.25	0.2873	44.00	431.75	0.1095	0.381135
Z.mays_cox	P.nudum_co	33.33	136.92	0.2943	51.67	433.08	0.1299	0.441386
Z.mays_cox	O.sativa_c	2.00	136.83	0.0148	1.00	433.17	0.0023	0.155405
Z.mays_cox	A.officina	14.50	136.75	0.1143	14.50	433.25	0.0342	0.299213
Z.mays_cox	M.baccata_	17.00	136.83	0.1358	27.00	433.17	0.0651	0.479381
Z.mays_cox	V.vinifera	14.00	137.67	0.1093	25.00	432.33	0.0602	0.550778
Z.mays_cox	C.coggygri	14.00	137.5	0.1094	25.00	432.5	0.0602	0.550274
Z.mays_cox	O.fragrans	14.50	135.17	0.1158	29.50	434.83	0.0711	0.61399
Z.mays_cox	C.quinoa_c	22.33	137.42	0.1832	39.67	432.58	0.0978	0.533843
Z.mays_cox	C.japonica	17.67	136	0.1426	36.33	434	0.0888	0.622721
Z.mays_cox	B.juncea_c	14.00	136	0.1107	32.00	434	0.0776	0.700994
Z.mays_cox	B.umbellat	28.33	137.5	0.2409	37.67	432.5	0.0926	0.384392
Z.mays_cox	F.hygromet	36.50	133.75	0.3393	41.50	436.25	0.1017	0.299735
Z.mays_cox	C.tinctori	16.00	136.5	0.1275	29.00	433.5	0.0701	0.549804
Z.mays_cox	S.miltiorr	17.00	135	0.1379	29.00	435	0.0698	0.506164
Z.mays_cox	C.sativa_c	17.00	135.25	0.1376	33.00	434.75	0.08	0.581395
Z.mays_cox	G.max_cox2	15.00	136.67	0.1187	27.00	433.33	0.065	0.547599
Z.mays_cox	D.hancocki	19.33	138.17	0.1549	31.67	431.83	0.0772	0.498386
Z.mays_cox	D.officina	11.50	137.08	0.089	17.50	432.92	0.0416	0.467416
Z.mays_cox	D.huoshane	11.50	137.08	0.089	17.50	432.92	0.0416	0.467416
G.biloba_c	F.gracilis	17.00	139.75	0.1327	32.00	430.25	0.0783	0.590053
G.biloba_c	C.sinensis	20.00	139.58	0.159	32.00	430.42	0.0783	0.492453
G.biloba_c	C.taitunge	15.67	140.67	0.1206	36.33	429.33	0.0898	0.74461
G.biloba_c	P.nudum_co	26.83	139.33	0.2226	51.17	430.67	0.1293	0.580863
G.biloba_c	O.sativa_c	23.50	139.25	0.1912	35.50	430.75	0.0873	0.45659
G.biloba_c	A.officina	19.00	139.17	0.1507	28.00	430.83	0.068	0.451228
G.biloba_c	M.baccata_	21.00	139.25	0.1684	35.00	430.75	0.086	0.510689
G.biloba_c	V.vinifera	20.00	140.08	0.1584	31.00	429.92	0.0758	0.478535
G.biloba_c	C.coggygri	17.00	139.92	0.1326	31.00	430.08	0.0758	0.571644
G.biloba_c	O.fragrans	20.00	137.58	0.1616	37.00	432.42	0.0909	0.5625
G.biloba_c	C.quinoa_c	26.67	139.83	0.22	46.33	430.17	0.1163	0.528636
G.biloba_c	C.japonica	23.00	138.42	0.1878	39.00	431.58	0.0963	0.51278
G.biloba_c	B.juncea_c	21.00	138.42	0.1695	39.00	431.58	0.0963	0.568142
G.biloba_c	B.umbellat	31.17	139.92	0.2643	51.83	430.08	0.1314	0.497162
G.biloba_c	F.hygromet	30.00	136.17	0.2608	41.00	433.83	0.101	0.38727
G.biloba_c	C.tinctori	19.00	138.92	0.151	35.00	431.08	0.0859	0.568874
G.biloba_c	S.miltiorr	23.00	137.42	0.1894	39.00	432.58	0.0961	0.507392
G.biloba_c	C.sativa_c	23.50	137.67	0.1937	38.50	432.33	0.0948	0.489417
G.biloba_c	G.max_cox2	17.50	139.08	0.1377	34.50	430.92	0.0847	0.615105
G.biloba_c	D.hancocki	30.17	140.58	0.2528	47.83	429.42	0.1206	0.477057
G.biloba_c	D.officina	21.00	139.5	0.168	32.00	430.5	0.0783	0.466071
G.biloba_c	D.huoshane	21.00	139.5	0.168	32.00	430.5	0.0783	0.466071
F.gracilis	C.sinensis	7.00	137.67	0.0527	2.00	432.33	0.0046	0.0872865
F.gracilis	C.taitunge	25.17	138.75	0.2076	35.83	431.25	0.0881	0.424374
F.gracilis	P.nudum_co	31.83	137.42	0.2771	48.17	432.58	0.1205	0.434861
F.gracilis	O.sativa_c	13.00	137.33	0.1012	25.00	432.67	0.0601	0.593874
F.gracilis	A.officina	10.50	137.25	0.0807	13.50	432.75	0.0319	0.395291
F.gracilis	M.baccata_	7.00	137.33	0.0528	3.00	432.67	0.007	0.132576
F.gracilis	V.vinifera	6.00	138.17	0.0447	7.00	431.83	0.0164	0.36689
F.gracilis	C.coggygri	5.00	138	0.0371	1.00	432	0.0023	0.0619946
F.gracilis	O.fragrans	6.50	135.67	0.0495	10.50	434.33	0.0246	0.49697
F.gracilis	C.quinoa_c	14.50	137.92	0.1133	29.50	432.08	0.0716	0.631951
F.gracilis	C.japonica	8.67	136.5	0.0663	20.33	433.5	0.0484	0.730015
F.gracilis	B.juncea_c	7.00	136.5	0.0531	9.00	433.5	0.0211	0.397363
F.gracilis	B.umbellat	20.50	138	0.1655	39.50	432	0.0975	0.589124
F.gracilis	F.hygromet	34.00	134.25	0.309	35.00	435.75	0.085	0.275081
F.gracilis	C.tinctori	6.00	137	0.0451	11.00	433	0.0258	0.572062
F.gracilis	S.miltiorr	9.50	135.5	0.0736	10.50	434.5	0.0246	0.334239
F.gracilis	C.sativa_c	9.00	135.75	0.0694	11.00	434.25	0.0258	0.371758
F.gracilis	G.max_cox2	5.00	137.17	0.0374	3.00	432.83	0.007	0.187166
F.gracilis	D.hancocki	18.50	138.67	0.1469	33.50	431.33	0.082	0.558203
F.gracilis	D.officina	10.50	137.58	0.0805	17.50	432.42	0.0416	0.51677
F.gracilis	D.huoshane	10.50	137.58	0.0805	17.50	432.42	0.0416	0.51677
C.sinensis	C.taitunge	29.17	138.58	0.247	35.83	431.42	0.088	0.356275
C.sinensis	P.nudum_co	31.00	137.25	0.2687	47.00	432.75	0.1173	0.436546
C.sinensis	O.sativa_c	15.00	137.17	0.1182	25.00	432.83	0.0601	0.50846
C.sinensis	A.officina	12.50	137.08	0.0972	13.50	432.92	0.0319	0.328189
C.sinensis	M.baccata_	10.00	137.17	0.0767	5.00	432.83	0.0116	0.151239
C.sinensis	V.vinifera	7.00	138	0.0525	9.00	432	0.0211	0.401905
C.sinensis	C.coggygri	6.00	137.83	0.0448	1.00	432.17	0.0023	0.0513393
C.sinensis	O.fragrans	9.00	135.5	0.0695	13.00	434.5	0.0305	0.438849
C.sinensis	C.quinoa_c	18.00	137.75	0.1436	29.00	432.25	0.0703	0.489554
C.sinensis	C.japonica	9.67	136.33	0.0745	20.33	433.67	0.0484	0.649664
C.sinensis	B.juncea_c	8.00	136.33	0.0611	9.00	433.67	0.021	0.343699
C.sinensis	B.umbellat	24.00	137.83	0.1981	39.00	432.17	0.0962	0.485613
C.sinensis	F.hygromet	35.50	134.08	0.3266	36.50	435.92	0.0888	0.271892
C.sinensis	C.tinctori	9.00	136.83	0.0688	10.00	433.17	0.0234	0.340116
C.sinensis	S.miltiorr	11.50	135.33	0.0902	10.50	434.67	0.0246	0.272727
C.sinensis	C.sativa_c	12.00	135.58	0.0942	9.00	434.42	0.021	0.22293
C.sinensis	G.max_cox2	8.00	137	0.0608	5.00	433	0.0116	0.190789
C.sinensis	D.hancocki	20.00	138.5	0.1604	33.00	431.5	0.0807	0.503117
C.sinensis	D.officina	11.50	137.42	0.0887	17.50	432.58	0.0416	0.468997
C.sinensis	D.huoshane	11.50	137.42	0.0887	17.50	432.58	0.0416	0.468997
C.taitunge	P.nudum_co	37.00	138.33	0.3308	62.00	431.67	0.1594	0.481862
C.taitunge	O.sativa_c	32.00	138.25	0.2768	45.00	431.75	0.1122	0.405347
C.taitunge	A.officina	29.17	138.17	0.2479	35.83	431.83	0.0879	0.354578
C.taitunge	M.baccata_	31.17	138.25	0.2681	38.83	431.75	0.0958	0.357329
C.taitunge	V.vinifera	30.17	139.08	0.256	36.83	430.92	0.0908	0.354687
C.taitunge	C.coggygri	27.17	138.92	0.2266	34.83	431.08	0.0855	0.377317
C.taitunge	O.fragrans	30.83	136.58	0.2686	42.17	433.42	0.1042	0.387937
C.taitunge	C.quinoa_c	27.17	138.83	0.2267	39.83	431.17	0.0986	0.434936
C.taitunge	C.japonica	29.58	137.42	0.2538	43.42	432.58	0.1077	0.42435
C.taitunge	B.juncea_c	31.17	137.42	0.2701	42.83	432.58	0.1062	0.393188
C.taitunge	B.umbellat	31.67	138.92	0.2717	44.33	431.08	0.1106	0.407067
C.taitunge	F.hygromet	38.17	135.17	0.3543	53.83	434.83	0.1353	0.38188
C.taitunge	C.tinctori	28.17	137.92	0.2384	40.83	432.08	0.101	0.423658
C.taitunge	S.miltiorr	33.67	136.42	0.2993	42.33	433.58	0.1046	0.349482
C.taitunge	C.sativa_c	33.67	136.67	0.2986	44.33	433.33	0.11	0.368386
C.taitunge	G.max_cox2	28.00	138.08	0.2364	37.00	431.92	0.091	0.384941
C.taitunge	D.hancocki	30.67	139.58	0.26	40.33	430.42	0.1001	0.385
C.taitunge	D.officina	32.50	138.5	0.2814	41.50	431.5	0.1029	0.365672
C.taitunge	D.huoshane	32.50	138.5	0.2814	41.50	431.5	0.1029	0.365672
P.nudum_co	O.sativa_c	34.33	136.92	0.3052	50.67	433.08	0.1272	0.416776
P.nudum_co	A.officina	31.83	136.83	0.2785	49.17	433.17	0.1231	0.442011
P.nudum_co	M.baccata_	34.33	136.92	0.3052	48.67	433.08	0.1217	0.398755
P.nudum_co	V.vinifera	30.33	137.75	0.2607	50.67	432.25	0.1275	0.489068
P.nudum_co	C.coggygri	30.83	137.58	0.2662	47.17	432.42	0.1179	0.4429
P.nudum_co	O.fragrans	29.25	135.25	0.2551	43.75	434.75	0.1081	0.423755
P.nudum_co	C.quinoa_c	36.67	137.5	0.3295	48.33	432.5	0.121	0.367223
P.nudum_co	C.japonica	31.00	136.08	0.2715	51.00	433.92	0.1278	0.470718
P.nudum_co	B.juncea_c	30.83	136.08	0.2698	48.17	433.92	0.1201	0.445145
P.nudum_co	B.umbellat	45.17	137.58	0.4318	57.83	432.42	0.1473	0.34113
P.nudum_co	F.hygromet	26.25	133.83	0.2274	31.75	436.17	0.0766	0.336851
P.nudum_co	C.tinctori	29.33	136.58	0.253	52.67	433.42	0.1326	0.524111
P.nudum_co	S.miltiorr	28.83	135.08	0.2512	46.17	434.92	0.1145	0.455812
P.nudum_co	C.sativa_c	34.33	135.33	0.3097	41.67	434.67	0.1026	0.331288
P.nudum_co	G.max_cox2	30.83	136.75	0.2682	49.17	433.25	0.123	0.458613
P.nudum_co	D.hancocki	41.17	138.25	0.3794	56.83	431.75	0.1447	0.381392
P.nudum_co	D.officina	32.00	137.17	0.2794	49.00	432.83	0.1227	0.439155
P.nudum_co	D.huoshane	32.00	137.17	0.2794	49.00	432.83	0.1227	0.439155
O.sativa_c	A.officina	14.50	136.75	0.1143	15.50	433.25	0.0367	0.321085
O.sativa_c	M.baccata_	16.00	136.83	0.1271	26.00	433.17	0.0626	0.492526
O.sativa_c	V.vinifera	13.00	137.67	0.1009	26.00	432.33	0.0627	0.621407
O.sativa_c	C.coggygri	14.00	137.5	0.1094	26.00	432.5	0.0627	0.573126
O.sativa_c	O.fragrans	13.50	135.17	0.1072	28.50	434.83	0.0686	0.639925
O.sativa_c	C.quinoa_c	21.33	137.42	0.1739	38.67	432.58	0.0952	0.547441
O.sativa_c	C.japonica	16.67	136	0.1338	37.33	434	0.0914	0.683109
O.sativa_c	B.juncea_c	14.00	136	0.1107	33.00	434	0.0802	0.724481
O.sativa_c	B.umbellat	27.33	137.5	0.231	38.67	432.5	0.0952	0.412121
O.sativa_c	F.hygromet	37.50	133.75	0.3511	40.50	436.25	0.0991	0.282256
O.sativa_c	C.tinctori	15.00	136.5	0.1188	30.00	433.5	0.0726	0.611111
O.sativa_c	S.miltiorr	16.00	135	0.129	28.00	435	0.0673	0.521705
O.sativa_c	C.sativa_c	16.00	135.25	0.1287	32.00	434.75	0.0775	0.602176
O.sativa_c	G.max_cox2	14.00	136.67	0.1101	28.00	433.33	0.0676	0.613987
O.sativa_c	D.hancocki	19.33	138.17	0.1549	32.67	431.83	0.0797	0.514526
O.sativa_c	D.officina	11.50	137.08	0.089	16.50	432.92	0.0391	0.439326
O.sativa_c	D.huoshane	11.50	137.08	0.089	16.50	432.92	0.0391	0.439326
A.officina	M.baccata_	12.50	136.75	0.0975	16.50	433.25	0.0391	0.401026
A.officina	V.vinifera	12.50	137.58	0.0968	14.50	432.42	0.0343	0.354339
A.officina	C.coggygri	9.50	137.42	0.0725	14.50	432.58	0.0343	0.473103
A.officina	O.fragrans	13.00	135.08	0.103	20.00	434.92	0.0475	0.461165
A.officina	C.quinoa_c	21.00	137.33	0.171	33.00	432.67	0.0804	0.470175
A.officina	C.japonica	16.17	135.92	0.1295	27.83	434.08	0.067	0.517375
A.officina	B.juncea_c	11.50	135.92	0.0898	22.50	434.08	0.0537	0.597996
A.officina	B.umbellat	24.00	137.42	0.1988	33.00	432.58	0.0805	0.40493
A.officina	F.hygromet	35.00	133.67	0.3221	37.00	436.33	0.09	0.279416
A.officina	C.tinctori	15.50	136.42	0.1232	16.50	433.58	0.0391	0.31737
A.officina	S.miltiorr	15.50	134.92	0.1247	18.50	435.08	0.0438	0.351243
A.officina	C.sativa_c	13.50	135.17	0.1072	22.50	434.83	0.0536	0.5
A.officina	G.max_cox2	11.50	136.58	0.0893	16.50	433.42	0.0391	0.43785
A.officina	D.hancocki	16.00	138.08	0.1259	28.00	431.92	0.0678	0.538523
A.officina	D.officina	7.00	137	0.0529	10.00	433	0.0235	0.444234
A.officina	D.huoshane	7.00	137	0.0529	10.00	433	0.0235	0.444234
M.baccata_	V.vinifera	9.00	137.67	0.0684	10.00	432.33	0.0235	0.343567
M.baccata_	C.coggygri	8.00	137.5	0.0606	4.00	432.5	0.0093	0.153465
M.baccata_	O.fragrans	8.00	135.17	0.0617	10.00	434.83	0.0234	0.379254
M.baccata_	C.quinoa_c	18.50	137.42	0.1484	28.50	432.58	0.069	0.46496
M.baccata_	C.japonica	10.67	136	0.0828	23.33	434	0.0558	0.673913
M.baccata_	B.juncea_c	10.50	136	0.0815	11.50	434	0.027	0.331288
M.baccata_	B.umbellat	24.50	137.5	0.2034	40.50	432.5	0.1	0.491642
M.baccata_	F.hygromet	37.50	133.75	0.3511	36.50	436.25	0.0887	0.252635
M.baccata_	C.tinctori	11.00	136.5	0.0853	14.00	433.5	0.033	0.38687
M.baccata_	S.miltiorr	11.00	135	0.0863	10.00	435	0.0233	0.269988
M.baccata_	C.sativa_c	11.00	135.25	0.0861	12.00	434.75	0.0281	0.326365
M.baccata_	G.max_cox2	8.00	136.67	0.0609	6.00	433.33	0.014	0.229885
M.baccata_	D.hancocki	22.50	138.17	0.1836	36.50	431.83	0.0897	0.488562
M.baccata_	D.officina	13.50	137.08	0.1056	18.50	432.92	0.044	0.416667
M.baccata_	D.huoshane	13.50	137.08	0.1056	18.50	432.92	0.044	0.416667
V.vinifera	C.coggygri	7.00	138.33	0.0524	8.00	431.67	0.0188	0.358779
V.vinifera	O.fragrans	6.50	136	0.0494	11.50	434	0.027	0.546559
V.vinifera	C.quinoa_c	15.50	138.25	0.1214	32.50	431.75	0.0793	0.653213
V.vinifera	C.japonica	8.67	136.83	0.0662	25.33	433.17	0.0609	0.91994
V.vinifera	B.juncea_c	6.00	136.83	0.0452	16.00	433.17	0.0379	0.838496
V.vinifera	B.umbellat	23.50	138.33	0.1926	37.50	431.67	0.0923	0.479232
V.vinifera	F.hygromet	34.50	134.58	0.3137	41.50	435.42	0.1019	0.324833
V.vinifera	C.tinctori	6.00	137.33	0.045	16.00	432.67	0.0379	0.842222
V.vinifera	S.miltiorr	8.50	135.83	0.0653	13.50	434.17	0.0318	0.486983
V.vinifera	C.sativa_c	9.00	136.08	0.0692	16.00	433.92	0.0378	0.546243
V.vinifera	G.max_cox2	7.00	137.5	0.0527	10.00	432.5	0.0235	0.44592
V.vinifera	D.hancocki	18.50	139	0.1465	34.50	431	0.0846	0.577474
V.vinifera	D.officina	9.50	137.92	0.0723	18.50	432.08	0.0441	0.609959
V.vinifera	D.huoshane	9.50	137.92	0.0723	18.50	432.08	0.0441	0.609959
C.coggygri	O.fragrans	7.50	135.83	0.0574	11.50	434.17	0.027	0.470383
C.coggygri	C.quinoa_c	16.50	138.08	0.1302	28.50	431.92	0.0691	0.530722
C.coggygri	C.japonica	9.67	136.67	0.0743	19.33	433.33	0.046	0.619112
C.coggygri	B.juncea_c	6.00	136.67	0.0452	8.00	433.33	0.0187	0.413717
C.coggygri	B.umbellat	22.50	138.17	0.1836	40.50	431.83	0.1002	0.545752
C.coggygri	F.hygromet	33.00	134.42	0.2974	34.00	435.58	0.0824	0.277068
C.coggygri	C.tinctori	9.00	137.17	0.0687	10.00	432.83	0.0235	0.342067
C.coggygri	S.miltiorr	10.50	135.67	0.0817	11.50	434.33	0.027	0.330477
C.coggygri	C.sativa_c	10.00	135.92	0.0774	10.00	434.08	0.0234	0.302326
C.coggygri	G.max_cox2	6.00	137.33	0.045	4.00	432.67	0.0093	0.206667
C.coggygri	D.hancocki	18.50	138.83	0.1467	34.50	431.17	0.0846	0.576687
C.coggygri	D.officina	9.50	137.75	0.0723	18.50	432.25	0.0441	0.609959
C.coggygri	D.huoshane	9.50	137.75	0.0723	18.50	432.25	0.0441	0.609959
O.fragrans	C.quinoa_c	15.00	135.75	0.1195	32.00	434.25	0.0776	0.649372
O.fragrans	C.japonica	7.17	134.33	0.0553	24.83	435.67	0.0593	1.07233
O.fragrans	B.juncea_c	9.00	134.33	0.0702	17.00	435.67	0.0401	0.571225
O.fragrans	B.umbellat	23.00	135.83	0.1919	41.00	434.17	0.1009	0.525795
O.fragrans	F.hygromet	33.50	132.08	0.3096	32.50	437.92	0.0781	0.252261
O.fragrans	C.tinctori	8.50	134.83	0.0658	19.50	435.17	0.0462	0.702128
O.fragrans	S.miltiorr	3.00	133.33	0.0228	6.00	436.67	0.0139	0.609649
O.fragrans	C.sativa_c	11.50	133.58	0.0914	11.50	436.42	0.0268	0.293217
O.fragrans	G.max_cox2	7.50	135	0.0577	11.50	435	0.0269	0.466205
O.fragrans	D.hancocki	20.00	136.5	0.163	40.00	433.5	0.0985	0.604294
O.fragrans	D.officina	11.00	135.42	0.086	24.00	434.58	0.0574	0.667442
O.fragrans	D.huoshane	11.00	135.42	0.086	24.00	434.58	0.0574	0.667442
C.quinoa_c	C.japonica	16.33	136.58	0.1303	35.67	433.42	0.0872	0.669225
C.quinoa_c	B.juncea_c	18.00	136.58	0.1449	34.00	433.42	0.0829	0.572119
C.quinoa_c	B.umbellat	14.50	138.08	0.1131	20.50	431.92	0.049	0.433245
C.quinoa_c	F.hygromet	40.75	134.33	0.3887	43.25	435.67	0.1065	0.27399
C.quinoa_c	C.tinctori	17.50	137.08	0.1399	34.50	432.92	0.0843	0.602573
C.quinoa_c	S.miltiorr	17.50	135.58	0.1416	34.50	434.42	0.0839	0.592514
C.quinoa_c	C.sativa_c	20.50	135.83	0.1685	32.50	434.17	0.0789	0.468249
C.quinoa_c	G.max_cox2	16.00	137.25	0.1267	30.00	432.75	0.0727	0.573796
C.quinoa_c	D.hancocki	10.50	138.75	0.0798	20.50	431.25	0.0491	0.615288
C.quinoa_c	D.officina	18.67	137.67	0.1496	36.33	432.33	0.0891	0.595588
C.quinoa_c	D.huoshane	18.67	137.67	0.1496	36.33	432.33	0.0891	0.595588
C.japonica	B.juncea_c	10.67	135.17	0.0834	27.33	434.83	0.0657	0.78777
C.japonica	B.umbellat	23.83	136.67	0.1985	47.17	433.33	0.1176	0.592443
C.japonica	F.hygromet	36.00	132.92	0.336	39.00	437.08	0.095	0.282738
C.japonica	C.tinctori	8.67	135.67	0.0668	29.33	434.33	0.0708	1.05988
C.japonica	S.miltiorr	10.17	134.17	0.0799	26.83	435.83	0.0642	0.803504
C.japonica	C.sativa_c	13.67	134.42	0.1093	27.33	435.58	0.0655	0.599268
C.japonica	G.max_cox2	8.83	135.83	0.068	19.17	434.17	0.0455	0.669118
C.japonica	D.hancocki	21.83	137.33	0.1787	43.17	432.67	0.1071	0.599328
C.japonica	D.officina	14.17	136.25	0.1119	31.83	433.75	0.0772	0.689902
C.japonica	D.huoshane	14.17	136.25	0.1119	31.83	433.75	0.0772	0.689902
B.juncea_c	B.umbellat	24.50	136.67	0.2049	46.50	433.33	0.1158	0.565154
B.juncea_c	F.hygromet	35.00	132.92	0.3244	37.00	437.08	0.0898	0.276819
B.juncea_c	C.tinctori	6.00	135.67	0.0456	18.00	434.33	0.0426	0.934211
B.juncea_c	S.miltiorr	11.00	134.17	0.0868	17.00	435.83	0.0401	0.461982
B.juncea_c	C.sativa_c	12.50	134.42	0.0993	11.50	435.58	0.0269	0.270896
B.juncea_c	G.max_cox2	8.00	135.83	0.0613	12.00	434.17	0.0282	0.460033
B.juncea_c	D.hancocki	18.50	137.33	0.1485	40.50	432.67	0.1	0.673401
B.juncea_c	D.officina	10.00	136.25	0.0772	24.00	433.75	0.0575	0.744819
B.juncea_c	D.huoshane	10.00	136.25	0.0772	24.00	433.75	0.0575	0.744819
B.umbellat	F.hygromet	48.25	134.42	0.4884	54.75	435.58	0.1376	0.281736
B.umbellat	C.tinctori	24.50	137.17	0.204	42.50	432.83	0.1052	0.515686
B.umbellat	S.miltiorr	25.50	135.67	0.2164	40.50	434.33	0.0996	0.460259
B.umbellat	C.sativa_c	26.50	135.92	0.2258	45.50	434.08	0.1129	0.5
B.umbellat	G.max_cox2	22.00	137.33	0.1802	40.00	432.67	0.0987	0.547725
B.umbellat	D.hancocki	15.00	138.83	0.1167	15.00	431.17	0.0356	0.305056
B.umbellat	D.officina	23.67	137.75	0.1951	34.33	432.25	0.084	0.430548
B.umbellat	D.huoshane	23.67	137.75	0.1951	34.33	432.25	0.084	0.430548
F.hygromet	C.tinctori	33.00	133.42	0.3001	39.00	436.58	0.0951	0.316894
F.hygromet	S.miltiorr	34.00	131.92	0.3158	37.00	438.08	0.0896	0.283724
F.hygromet	C.sativa_c	38.50	132.17	0.3688	28.50	437.83	0.0681	0.184653
F.hygromet	G.max_cox2	34.00	133.58	0.3109	36.00	436.42	0.0874	0.281119
F.hygromet	D.hancocki	42.75	135.08	0.4111	52.25	434.92	0.1309	0.318414
F.hygromet	D.officina	33.50	134	0.3041	38.50	436	0.0939	0.30878
F.hygromet	D.huoshane	33.50	134	0.3041	38.50	436	0.0939	0.30878
C.tinctori	S.miltiorr	10.50	134.67	0.0823	16.50	435.33	0.0389	0.472661
C.tinctori	C.sativa_c	13.00	134.92	0.1031	15.00	435.08	0.0353	0.342386
C.tinctori	G.max_cox2	9.00	136.33	0.0691	14.00	433.67	0.033	0.477569
C.tinctori	D.hancocki	21.50	137.83	0.1749	38.50	432.17	0.0948	0.542024
C.tinctori	D.officina	12.50	136.75	0.0975	22.50	433.25	0.0538	0.551795
C.tinctori	D.huoshane	12.50	136.75	0.0975	22.50	433.25	0.0538	0.551795
S.miltiorr	C.sativa_c	14.50	133.42	0.1174	11.50	436.58	0.0268	0.228279
S.miltiorr	G.max_cox2	10.50	134.83	0.0822	11.50	435.17	0.0269	0.327251
S.miltiorr	D.hancocki	21.00	136.33	0.1724	40.00	433.67	0.0984	0.570766
S.miltiorr	D.officina	12.00	135.25	0.0944	22.00	434.75	0.0524	0.555085
S.miltiorr	D.huoshane	12.00	135.25	0.0944	22.00	434.75	0.0524	0.555085
C.sativa_c	G.max_cox2	10.00	135.08	0.0779	12.00	434.92	0.0281	0.360719
C.sativa_c	D.hancocki	23.50	136.58	0.1954	42.50	433.42	0.1051	0.537871
C.sativa_c	D.officina	14.50	135.5	0.1155	24.50	434.5	0.0586	0.507359
C.sativa_c	D.huoshane	14.50	135.5	0.1155	24.50	434.5	0.0586	0.507359
G.max_cox2	D.hancocki	20.00	138	0.161	34.00	432	0.0831	0.516149
G.max_cox2	D.officina	11.50	136.92	0.0891	20.50	433.08	0.0489	0.548822
G.max_cox2	D.huoshane	11.50	136.92	0.0891	20.50	433.08	0.0489	0.548822
D.hancocki	D.officina	8.67	138.42	0.0654	21.33	431.58	0.0511	0.781346
D.hancocki	D.huoshane	8.67	138.42	0.0654	21.33	431.58	0.0511	0.781346
D.officina	D.huoshane	0.00	137.33	0	0.00	432.67	0	#DIV/0!

## Sheet: nad4
Seq 1	Seq 2	SilentDif	SilentPos	Ks	NSynDif	NSynPos	Ka	Ka/Ks
G.elata_na	A.thaliana	18.83	129.5	0.1617	40.17	386.5	0.1119	0.692022
G.elata_na	Z.mays_nad	14.83	129.5	0.1243	40.17	386.5	0.1119	0.900241
G.elata_na	G.biloba_n	26.58	134.17	0.2301	58.42	381.83	0.1711	0.74359
G.elata_na	F.gracilis	17.33	129.83	0.147	36.67	386.17	0.1015	0.690476
G.elata_na	C.sinensis	25.75	128.25	0.2337	72.25	387.75	0.2142	0.91656
G.elata_na	C.taitunge	25.58	132	0.2242	51.42	384	0.1475	0.657895
G.elata_na	P.nudum_na	37.33	130.33	0.3609	68.67	385.67	0.2033	0.563314
G.elata_na	O.sativa_n	12.83	129.5	0.1063	40.17	386.5	0.1119	1.05268
G.elata_na	A.officina	14.33	130.92	0.1183	28.67	385.08	0.0784	0.662722
G.elata_na	M.baccata_	16.33	130.17	0.1373	34.67	385.83	0.0957	0.697014
G.elata_na	V.vinifera	14.33	130.92	0.1183	32.67	385.08	0.09	0.760778
G.elata_na	C.coggygri	15.83	130	0.1329	38.17	386	0.106	0.797592
G.elata_na	O.fragrans	17.33	130.5	0.1462	35.67	385.5	0.0987	0.675103
G.elata_na	C.quinoa_n	20.83	128.67	0.1824	41.17	387.33	0.1146	0.628289
G.elata_na	C.japonica	19.33	128.75	0.1676	38.67	387.25	0.1072	0.639618
G.elata_na	B.juncea_n	17.83	129.5	0.1521	39.17	386.5	0.1089	0.715976
G.elata_na	B.umbellat	13.33	131	0.1094	31.67	385	0.0871	0.796161
G.elata_na	F.hygromet	44.33	127.58	0.4668	55.67	388.42	0.159	0.340617
G.elata_na	C.tinctori	20.83	129.17	0.1816	39.17	386.83	0.1088	0.599119
G.elata_na	S.miltiorr	17.33	130	0.1468	35.67	386	0.0986	0.671662
G.elata_na	C.sativa_n	17.33	129.83	0.147	37.67	386.17	0.1045	0.710884
G.elata_na	G.max_nad4	18.33	129.67	0.1567	40.67	386.33	0.1134	0.723676
G.elata_na	D.hancocki	9.33	130.92	0.0749	26.67	385.08	0.0727	0.970628
G.elata_na	D.officina	9.33	130.92	0.0749	26.67	385.08	0.0727	0.970628
G.elata_na	D.huoshane	9.33	130.75	0.075	27.67	385.25	0.0755	1.00667
A.thaliana	Z.mays_nad	12.00	127	0.101	11.00	389	0.0288	0.285149
A.thaliana	G.biloba_n	25.50	131.67	0.224	41.50	384.33	0.1166	0.520536
A.thaliana	F.gracilis	5.50	127.33	0.0445	5.50	388.67	0.0143	0.321348
A.thaliana	C.sinensis	21.17	125.75	0.1906	47.83	390.25	0.1338	0.701994
A.thaliana	C.taitunge	25.50	129.5	0.2284	31.50	386.5	0.0863	0.377846
A.thaliana	P.nudum_na	35.50	127.83	0.3469	41.50	388.17	0.1153	0.332372
A.thaliana	O.sativa_n	10.00	127	0.0832	9.00	389	0.0235	0.282452
A.thaliana	A.officina	8.50	128.42	0.0693	11.50	387.58	0.0303	0.437229
A.thaliana	M.baccata_	4.00	127.67	0.032	6.00	388.33	0.0156	0.4875
A.thaliana	V.vinifera	4.50	128.42	0.0359	9.50	387.58	0.0249	0.693593
A.thaliana	C.coggygri	6.00	127.5	0.0486	4.00	388.5	0.0104	0.213992
A.thaliana	O.fragrans	5.50	128	0.0442	8.50	388	0.0222	0.502262
A.thaliana	C.quinoa_n	13.00	126.17	0.1108	10.00	389.83	0.0261	0.23556
A.thaliana	C.japonica	10.00	126.25	0.0837	9.00	389.75	0.0235	0.280765
A.thaliana	B.juncea_n	1.00	127	0.0079	1.00	389	0.0026	0.329114
A.thaliana	B.umbellat	9.50	128.5	0.0778	14.50	387.5	0.0384	0.493573
A.thaliana	F.hygromet	37.00	125.08	0.3762	24.00	390.92	0.0641	0.170388
A.thaliana	C.tinctori	9.00	126.67	0.0746	9.00	389.33	0.0235	0.315013
A.thaliana	S.miltiorr	6.50	127.5	0.0528	6.50	388.5	0.0169	0.320076
A.thaliana	C.sativa_n	7.50	127.33	0.0613	6.50	388.67	0.0169	0.275693
A.thaliana	G.max_nad4	6.50	127.17	0.0529	7.50	388.83	0.0195	0.36862
A.thaliana	D.hancocki	9.50	128.42	0.0779	13.50	387.58	0.0357	0.45828
A.thaliana	D.officina	9.50	128.42	0.0779	13.50	387.58	0.0357	0.45828
A.thaliana	D.huoshane	9.50	128.25	0.078	12.50	387.75	0.033	0.423077
Z.mays_nad	G.biloba_n	23.00	131.67	0.1989	42.00	384.33	0.1181	0.593766
Z.mays_nad	F.gracilis	10.00	127.33	0.083	10.00	388.67	0.0262	0.315663
Z.mays_nad	C.sinensis	25.67	125.75	0.2382	38.33	390.25	0.1053	0.442065
Z.mays_nad	C.taitunge	23.00	129.5	0.2027	32.00	386.5	0.0877	0.432659
Z.mays_nad	P.nudum_na	36.50	127.83	0.3594	37.50	388.17	0.1034	0.287702
Z.mays_nad	O.sativa_n	2.00	127	0.0159	2.00	389	0.0052	0.327044
Z.mays_nad	A.officina	8.00	128.42	0.065	12.00	387.58	0.0316	0.486154
Z.mays_nad	M.baccata_	9.50	127.67	0.0784	7.50	388.33	0.0196	0.25
Z.mays_nad	V.vinifera	8.50	128.42	0.0693	13.50	387.58	0.0357	0.515152
Z.mays_nad	C.coggygri	10.00	127.5	0.0828	9.00	388.5	0.0235	0.283816
Z.mays_nad	O.fragrans	10.00	128	0.0825	9.00	388	0.0236	0.286061
Z.mays_nad	C.quinoa_n	14.00	126.17	0.1201	5.00	389.83	0.0129	0.10741
Z.mays_nad	C.japonica	12.00	126.25	0.1016	10.00	389.75	0.0261	0.25689
Z.mays_nad	B.juncea_n	11.00	127	0.092	10.00	389	0.0262	0.284783
Z.mays_nad	B.umbellat	7.00	128.5	0.0566	15.00	387.5	0.0397	0.701413
Z.mays_nad	F.hygromet	40.00	125.08	0.4168	20.00	390.92	0.053	0.127159
Z.mays_nad	C.tinctori	13.00	126.67	0.1104	4.00	389.33	0.0103	0.0932971
Z.mays_nad	S.miltiorr	9.00	127.5	0.0741	9.00	388.5	0.0235	0.317139
Z.mays_nad	C.sativa_n	11.00	127.33	0.0918	9.00	388.67	0.0235	0.255991
Z.mays_nad	G.max_nad4	11.00	127.17	0.0919	14.00	388.83	0.0369	0.401523
Z.mays_nad	D.hancocki	7.00	128.42	0.0566	14.00	387.58	0.037	0.65371
Z.mays_nad	D.officina	7.00	128.42	0.0566	14.00	387.58	0.037	0.65371
Z.mays_nad	D.huoshane	7.00	128.25	0.0567	13.00	387.75	0.0343	0.604938
G.biloba_n	F.gracilis	23.50	132	0.2032	40.50	384	0.1137	0.559547
G.biloba_n	C.sinensis	37.33	130.42	0.3606	72.67	385.58	0.217	0.601775
G.biloba_n	C.taitunge	15.50	134.17	0.1255	19.50	381.83	0.0529	0.421514
G.biloba_n	P.nudum_na	36.00	132.5	0.3374	56.00	383.5	0.1624	0.481328
G.biloba_n	O.sativa_n	21.00	131.67	0.1793	42.00	384.33	0.1181	0.658673
G.biloba_n	A.officina	22.00	133.08	0.1867	37.00	382.92	0.1034	0.55383
G.biloba_n	M.baccata_	23.00	132.33	0.1977	40.00	383.67	0.1123	0.568032
G.biloba_n	V.vinifera	20.00	133.08	0.1677	39.00	382.92	0.1095	0.652952
G.biloba_n	C.coggygri	22.50	132.17	0.1931	39.50	383.83	0.1107	0.573278
G.biloba_n	O.fragrans	22.50	132.67	0.1923	39.50	383.33	0.1108	0.576183
G.biloba_n	C.quinoa_n	26.50	130.83	0.2361	41.50	385.17	0.1163	0.492588
G.biloba_n	C.japonica	27.00	130.92	0.2412	40.00	385.08	0.1118	0.463516
G.biloba_n	B.juncea_n	24.50	131.67	0.2139	40.50	384.33	0.1136	0.531089
G.biloba_n	B.umbellat	21.00	133.17	0.177	38.00	382.83	0.1065	0.601695
G.biloba_n	F.hygromet	40.00	129.75	0.3971	48.00	386.25	0.1359	0.342231
G.biloba_n	C.tinctori	28.00	131.33	0.2508	40.00	384.67	0.1119	0.446172
G.biloba_n	S.miltiorr	22.50	132.17	0.1931	39.50	383.83	0.1107	0.573278
G.biloba_n	C.sativa_n	23.50	132	0.2032	39.50	384	0.1106	0.544291
G.biloba_n	G.max_nad4	24.50	131.83	0.2136	39.50	384.17	0.1106	0.51779
G.biloba_n	D.hancocki	19.00	133.08	0.1584	35.00	382.92	0.0975	0.61553
G.biloba_n	D.officina	19.00	133.08	0.1584	35.00	382.92	0.0975	0.61553
G.biloba_n	D.huoshane	19.00	132.92	0.1586	36.00	383.08	0.1004	0.633039
F.gracilis	C.sinensis	19.67	126.08	0.1749	46.33	389.92	0.1294	0.739851
F.gracilis	C.taitunge	23.50	129.83	0.2071	30.50	386.17	0.0835	0.403187
F.gracilis	P.nudum_na	35.50	128.17	0.3457	40.50	387.83	0.1125	0.325427
F.gracilis	O.sativa_n	8.00	127.33	0.0656	10.00	388.67	0.0262	0.39939
F.gracilis	A.officina	9.00	128.75	0.0734	8.00	387.25	0.0209	0.284741
F.gracilis	M.baccata_	3.00	128	0.0238	4.00	388	0.0104	0.436975
F.gracilis	V.vinifera	3.00	128.75	0.0237	6.00	387.25	0.0157	0.662447
F.gracilis	C.coggygri	5.50	127.83	0.0443	3.50	388.17	0.0091	0.205418
F.gracilis	O.fragrans	4.00	128.33	0.0318	5.00	387.67	0.013	0.408805
F.gracilis	C.quinoa_n	9.00	126.5	0.0748	11.00	389.5	0.0288	0.385027
F.gracilis	C.japonica	9.50	126.58	0.0791	8.50	389.42	0.0222	0.280657
F.gracilis	B.juncea_n	4.50	127.33	0.0362	4.50	388.67	0.0117	0.323204
F.gracilis	B.umbellat	8.00	128.83	0.0648	11.00	387.17	0.029	0.447531
F.gracilis	F.hygromet	41.00	125.42	0.4294	25.00	390.58	0.0669	0.155799
F.gracilis	C.tinctori	8.50	127	0.0701	10.50	389	0.0275	0.392297
F.gracilis	S.miltiorr	5.00	127.83	0.0402	5.00	388.17	0.013	0.323383
F.gracilis	C.sativa_n	6.00	127.67	0.0485	3.00	388.33	0.0078	0.160825
F.gracilis	G.max_nad4	5.00	127.5	0.0403	4.00	388.5	0.0104	0.258065
F.gracilis	D.hancocki	8.00	128.75	0.0649	10.00	387.25	0.0263	0.405239
F.gracilis	D.officina	8.00	128.75	0.0649	10.00	387.25	0.0263	0.405239
F.gracilis	D.huoshane	8.00	128.58	0.0649	9.00	387.42	0.0236	0.363636
C.sinensis	C.taitunge	38.17	128.25	0.3791	64.83	387.75	0.1892	0.499077
C.sinensis	P.nudum_na	45.67	126.58	0.4919	59.33	389.42	0.1703	0.346209
C.sinensis	O.sativa_n	23.17	125.75	0.2114	38.83	390.25	0.1068	0.505203
C.sinensis	A.officina	22.67	127.17	0.2035	49.33	388.83	0.139	0.683047
C.sinensis	M.baccata_	19.17	126.42	0.1694	43.83	389.58	0.1219	0.719599
C.sinensis	V.vinifera	17.67	127.17	0.1536	50.33	388.83	0.1421	0.92513
C.sinensis	C.coggygri	17.17	126.25	0.15	45.83	389.75	0.1279	0.852667
C.sinensis	O.fragrans	20.67	126.75	0.1839	46.33	389.25	0.1296	0.704731
C.sinensis	C.quinoa_n	24.17	124.92	0.2238	40.83	391.08	0.1124	0.502234
C.sinensis	C.japonica	21.67	125	0.1971	46.33	391	0.129	0.65449
C.sinensis	B.juncea_n	20.17	125.75	0.1804	46.83	390.25	0.1308	0.725055
C.sinensis	B.umbellat	20.67	127.25	0.183	51.33	388.75	0.1452	0.793443
C.sinensis	F.hygromet	48.92	123.83	0.561	47.08	392.17	0.1308	0.233155
C.sinensis	C.tinctori	21.17	125.42	0.1912	39.83	390.58	0.1096	0.573222
C.sinensis	S.miltiorr	20.67	126.25	0.1847	46.33	389.75	0.1294	0.700596
C.sinensis	C.sativa_n	20.67	126.08	0.185	46.33	389.92	0.1294	0.699459
C.sinensis	G.max_nad4	21.67	125.92	0.1955	50.33	390.08	0.1416	0.724297
C.sinensis	D.hancocki	21.67	127.17	0.1933	51.33	388.83	0.1452	0.751164
C.sinensis	D.officina	21.67	127.17	0.1933	51.33	388.83	0.1452	0.751164
C.sinensis	D.huoshane	21.67	127	0.1936	50.33	389	0.142	0.733471
C.taitunge	P.nudum_na	37.17	130.33	0.3588	47.83	385.67	0.1356	0.377926
C.taitunge	O.sativa_n	21.00	129.5	0.1827	32.00	386.5	0.0877	0.480022
C.taitunge	A.officina	22.00	130.92	0.1903	29.00	385.08	0.0794	0.417236
C.taitunge	M.baccata_	23.00	130.17	0.2015	30.00	385.83	0.0821	0.407444
C.taitunge	V.vinifera	20.00	130.92	0.1708	31.00	385.08	0.0852	0.498829
C.taitunge	C.coggygri	22.50	130	0.1968	29.50	386	0.0806	0.409553
C.taitunge	O.fragrans	23.50	130.5	0.2059	29.50	385.5	0.0807	0.391938
C.taitunge	C.quinoa_n	27.50	128.67	0.2516	31.50	387.33	0.0861	0.34221
C.taitunge	C.japonica	26.50	128.75	0.2406	30.50	387.25	0.0832	0.345802
C.taitunge	B.juncea_n	24.50	129.5	0.218	30.50	386.5	0.0834	0.382569
C.taitunge	B.umbellat	21.00	131	0.1804	26.00	385	0.0708	0.392461
C.taitunge	F.hygromet	42.67	127.58	0.4428	34.33	388.42	0.0941	0.212511
C.taitunge	C.tinctori	28.00	129.17	0.2558	30.00	386.83	0.0819	0.320172
C.taitunge	S.miltiorr	23.50	130	0.2068	29.50	386	0.0806	0.389749
C.taitunge	C.sativa_n	23.50	129.83	0.2071	29.50	386.17	0.0806	0.389184
C.taitunge	G.max_nad4	24.50	129.67	0.2177	29.50	386.33	0.0805	0.369775
C.taitunge	D.hancocki	19.00	130.92	0.1613	27.00	385.08	0.0736	0.456293
C.taitunge	D.officina	19.00	130.92	0.1613	27.00	385.08	0.0736	0.456293
C.taitunge	D.huoshane	19.00	130.75	0.1615	28.00	385.25	0.0764	0.473065
P.nudum_na	O.sativa_n	34.50	127.83	0.3345	35.50	388.17	0.0975	0.29148
P.nudum_na	A.officina	36.50	129.25	0.3543	44.50	386.75	0.1249	0.352526
P.nudum_na	M.baccata_	34.50	128.5	0.3323	38.50	387.5	0.1066	0.320794
P.nudum_na	V.vinifera	34.50	129.25	0.3299	46.50	386.75	0.131	0.39709
P.nudum_na	C.coggygri	33.50	128.33	0.3208	40.50	387.67	0.1125	0.350686
P.nudum_na	O.fragrans	33.50	128.83	0.3193	41.50	387.17	0.1157	0.362355
P.nudum_na	C.quinoa_n	41.00	127	0.4222	35.00	389	0.0958	0.226907
P.nudum_na	C.japonica	34.00	127.08	0.3309	43.00	388.92	0.1196	0.361439
P.nudum_na	B.juncea_n	34.50	127.83	0.3345	42.50	388.17	0.1184	0.353961
P.nudum_na	B.umbellat	34.00	129.33	0.3237	45.00	386.67	0.1265	0.390794
P.nudum_na	F.hygromet	32.00	125.92	0.3103	25.00	390.08	0.067	0.21592
P.nudum_na	C.tinctori	36.50	127.5	0.3606	34.50	388.5	0.0945	0.262063
P.nudum_na	S.miltiorr	34.50	128.33	0.3329	40.50	387.67	0.1125	0.337939
P.nudum_na	C.sativa_n	37.50	128.17	0.3709	39.50	387.83	0.1095	0.295228
P.nudum_na	G.max_nad4	36.50	128	0.3588	41.50	388	0.1154	0.321628
P.nudum_na	D.hancocki	31.50	129.25	0.2947	46.50	386.75	0.131	0.44452
P.nudum_na	D.officina	31.50	129.25	0.2947	46.50	386.75	0.131	0.44452
P.nudum_na	D.huoshane	31.50	129.08	0.2952	45.50	386.92	0.1279	0.433266
O.sativa_n	A.officina	6.00	128.42	0.0482	12.00	387.58	0.0316	0.655602
O.sativa_n	M.baccata_	7.50	127.67	0.0612	7.50	388.33	0.0196	0.320261
O.sativa_n	V.vinifera	6.00	128.42	0.0482	14.00	387.58	0.037	0.767635
O.sativa_n	C.coggygri	8.00	127.5	0.0655	9.00	388.5	0.0235	0.358779
O.sativa_n	O.fragrans	8.00	128	0.0653	9.00	388	0.0236	0.361409
O.sativa_n	C.quinoa_n	12.00	126.17	0.1017	3.00	389.83	0.0077	0.0757129
O.sativa_n	C.japonica	10.00	126.25	0.0837	10.00	389.75	0.0261	0.311828
O.sativa_n	B.juncea_n	9.00	127	0.0744	10.00	389	0.0262	0.352151
O.sativa_n	B.umbellat	5.00	128.5	0.04	15.00	387.5	0.0397	0.9925
O.sativa_n	F.hygromet	38.00	125.08	0.3895	18.00	390.92	0.0475	0.121951
O.sativa_n	C.tinctori	11.00	126.67	0.0923	4.00	389.33	0.0103	0.111593
O.sativa_n	S.miltiorr	7.00	127.5	0.057	9.00	388.5	0.0235	0.412281
O.sativa_n	C.sativa_n	9.00	127.33	0.0742	9.00	388.67	0.0235	0.316712
O.sativa_n	G.max_nad4	9.00	127.17	0.0743	14.00	388.83	0.0369	0.496635
O.sativa_n	D.hancocki	5.00	128.42	0.04	14.00	387.58	0.037	0.925
O.sativa_n	D.officina	5.00	128.42	0.04	14.00	387.58	0.037	0.925
O.sativa_n	D.huoshane	5.00	128.25	0.04	13.00	387.75	0.0343	0.8575
A.officina	M.baccata_	8.00	129.08	0.0647	6.00	386.92	0.0157	0.242658
A.officina	V.vinifera	6.00	129.83	0.0477	6.00	386.17	0.0157	0.32914
A.officina	C.coggygri	7.50	128.92	0.0606	9.50	387.08	0.025	0.412541
A.officina	O.fragrans	9.00	129.42	0.073	7.00	386.58	0.0183	0.250685
A.officina	C.quinoa_n	14.00	127.58	0.1186	13.00	388.42	0.0342	0.288364
A.officina	C.japonica	13.50	127.67	0.114	10.50	388.33	0.0275	0.241228
A.officina	B.juncea_n	7.50	128.42	0.0608	10.50	387.58	0.0276	0.453947
A.officina	B.umbellat	5.00	129.92	0.0395	7.00	386.08	0.0184	0.465823
A.officina	F.hygromet	37.00	126.5	0.3707	29.00	389.5	0.0784	0.211492
A.officina	C.tinctori	12.50	128.08	0.1046	12.50	387.92	0.0329	0.314532
A.officina	S.miltiorr	9.00	128.92	0.0733	7.00	387.08	0.0183	0.249659
A.officina	C.sativa_n	9.00	128.75	0.0734	9.00	387.25	0.0236	0.321526
A.officina	G.max_nad4	10.00	128.58	0.0821	12.00	387.42	0.0316	0.384896
A.officina	D.hancocki	5.00	129.83	0.0395	2.00	386.17	0.0052	0.131646
A.officina	D.officina	5.00	129.83	0.0395	2.00	386.17	0.0052	0.131646
A.officina	D.huoshane	5.00	129.67	0.0396	1.00	386.33	0.0026	0.0656566
M.baccata_	V.vinifera	2.00	129.08	0.0157	8.00	386.92	0.021	1.33758
M.baccata_	C.coggygri	4.00	128.17	0.0319	4.00	387.83	0.0104	0.326019
M.baccata_	O.fragrans	3.00	128.67	0.0237	5.00	387.33	0.013	0.548523
M.baccata_	C.quinoa_n	9.50	126.83	0.0789	8.50	389.17	0.0222	0.281369
M.baccata_	C.japonica	8.00	126.92	0.0658	7.00	389.08	0.0182	0.276596
M.baccata_	B.juncea_n	3.00	127.67	0.0239	5.00	388.33	0.013	0.543933
M.baccata_	B.umbellat	7.00	129.17	0.0563	11.00	386.83	0.029	0.515098
M.baccata_	F.hygromet	40.50	125.75	0.4208	24.50	390.25	0.0656	0.155894
M.baccata_	C.tinctori	7.00	127.33	0.0571	7.00	388.67	0.0182	0.318739
M.baccata_	S.miltiorr	4.00	128.17	0.0319	5.00	387.83	0.013	0.407524
M.baccata_	C.sativa_n	5.00	128	0.0401	5.00	388	0.013	0.32419
M.baccata_	G.max_nad4	4.00	127.83	0.032	8.00	388.17	0.0209	0.653125
M.baccata_	D.hancocki	7.00	129.08	0.0563	8.00	386.92	0.021	0.373002
M.baccata_	D.officina	7.00	129.08	0.0563	8.00	386.92	0.021	0.373002
M.baccata_	D.huoshane	7.00	128.92	0.0564	7.00	387.08	0.0183	0.324468
V.vinifera	C.coggygri	2.50	128.92	0.0196	7.50	387.08	0.0196	1
V.vinifera	O.fragrans	3.00	129.42	0.0235	7.00	386.58	0.0183	0.778723
V.vinifera	C.quinoa_n	8.00	127.58	0.0655	15.00	388.42	0.0396	0.60458
V.vinifera	C.japonica	7.50	127.67	0.0612	10.50	388.33	0.0275	0.449346
V.vinifera	B.juncea_n	3.50	128.42	0.0278	8.50	387.58	0.0223	0.802158
V.vinifera	B.umbellat	5.00	129.92	0.0395	9.00	386.08	0.0237	0.6
V.vinifera	F.hygromet	40.00	126.5	0.4106	31.00	389.5	0.0841	0.204822
V.vinifera	C.tinctori	6.50	128.08	0.0525	14.50	387.92	0.0383	0.729524
V.vinifera	S.miltiorr	3.00	128.92	0.0236	7.00	387.08	0.0183	0.775424
V.vinifera	C.sativa_n	3.00	128.75	0.0237	7.00	387.25	0.0183	0.772152
V.vinifera	G.max_nad4	4.00	128.58	0.0318	10.00	387.42	0.0263	0.827044
V.vinifera	D.hancocki	5.00	129.83	0.0395	6.00	386.17	0.0157	0.397468
V.vinifera	D.officina	5.00	129.83	0.0395	6.00	386.17	0.0157	0.397468
V.vinifera	D.huoshane	5.00	129.67	0.0396	7.00	386.33	0.0183	0.462121
C.coggygri	O.fragrans	5.50	128.5	0.0441	6.50	387.5	0.017	0.385488
C.coggygri	C.quinoa_n	11.00	126.67	0.0923	10.00	389.33	0.0261	0.282774
C.coggygri	C.japonica	9.00	126.75	0.0746	7.00	389.25	0.0182	0.243968
C.coggygri	B.juncea_n	5.00	127.5	0.0403	3.00	388.5	0.0078	0.193548
C.coggygri	B.umbellat	6.50	129	0.0522	10.50	387	0.0276	0.528736
C.coggygri	F.hygromet	40.00	125.58	0.4146	26.00	390.42	0.0697	0.168114
C.coggygri	C.tinctori	8.00	127.17	0.0657	9.00	388.83	0.0235	0.357686
C.coggygri	S.miltiorr	5.50	128	0.0442	6.50	388	0.0169	0.382353
C.coggygri	C.sativa_n	5.50	127.83	0.0443	2.50	388.17	0.0065	0.146727
C.coggygri	G.max_nad4	6.50	127.67	0.0527	5.50	388.33	0.0143	0.271347
C.coggygri	D.hancocki	6.50	128.92	0.0522	11.50	387.08	0.0303	0.58046
C.coggygri	D.officina	6.50	128.92	0.0522	11.50	387.08	0.0303	0.58046
C.coggygri	D.huoshane	6.50	128.75	0.0523	10.50	387.25	0.0276	0.527725
O.fragrans	C.quinoa_n	11.00	127.17	0.0919	10.00	388.83	0.0262	0.285092
O.fragrans	C.japonica	7.50	127.25	0.0614	5.50	388.75	0.0143	0.232899
O.fragrans	B.juncea_n	4.50	128	0.036	7.50	388	0.0196	0.544444
O.fragrans	B.umbellat	8.00	129.5	0.0645	12.00	386.5	0.0317	0.491473
O.fragrans	F.hygromet	39.00	126.08	0.3988	26.00	389.92	0.0698	0.175025
O.fragrans	C.tinctori	6.50	127.67	0.0527	9.50	388.33	0.0249	0.472486
O.fragrans	S.miltiorr	1.00	128.5	0.0078	2.00	387.5	0.0052	0.666667
O.fragrans	C.sativa_n	6.00	128.33	0.0483	6.00	387.67	0.0156	0.322981
O.fragrans	G.max_nad4	5.00	128.17	0.0401	9.00	387.83	0.0236	0.588529
O.fragrans	D.hancocki	8.00	129.42	0.0645	9.00	386.58	0.0236	0.365891
O.fragrans	D.officina	8.00	129.42	0.0645	9.00	386.58	0.0236	0.365891
O.fragrans	D.huoshane	8.00	129.25	0.0646	8.00	386.75	0.021	0.325077
C.quinoa_n	C.japonica	14.00	125.42	0.1209	11.00	390.58	0.0287	0.237386
C.quinoa_n	B.juncea_n	12.00	126.17	0.1017	11.00	389.83	0.0288	0.283186
C.quinoa_n	B.umbellat	13.00	127.67	0.1094	18.00	388.33	0.0478	0.436929
C.quinoa_n	F.hygromet	43.00	124.25	0.4641	18.00	391.75	0.0474	0.102133
C.quinoa_n	C.tinctori	13.00	125.83	0.1112	5.00	390.17	0.0129	0.116007
C.quinoa_n	S.miltiorr	11.00	126.67	0.0923	10.00	389.33	0.0261	0.282774
C.quinoa_n	C.sativa_n	11.00	126.5	0.0924	10.00	389.5	0.0261	0.282468
C.quinoa_n	G.max_nad4	12.00	126.33	0.1016	15.00	389.67	0.0395	0.38878
C.quinoa_n	D.hancocki	13.00	127.58	0.1095	15.00	388.42	0.0396	0.361644
C.quinoa_n	D.officina	13.00	127.58	0.1095	15.00	388.42	0.0396	0.361644
C.quinoa_n	D.huoshane	13.00	127.42	0.1097	14.00	388.58	0.0369	0.336372
C.japonica	B.juncea_n	9.00	126.25	0.0749	8.00	389.75	0.0208	0.277704
C.japonica	B.umbellat	12.50	127.75	0.1048	15.50	388.25	0.041	0.391221
C.japonica	F.hygromet	42.00	124.33	0.4489	23.00	391.67	0.0611	0.13611
C.japonica	C.tinctori	9.00	125.92	0.0751	10.00	390.08	0.0261	0.347537
C.japonica	S.miltiorr	6.50	126.75	0.0531	5.50	389.25	0.0143	0.269303
C.japonica	C.sativa_n	10.50	126.58	0.0879	9.50	389.42	0.0248	0.282139
C.japonica	G.max_nad4	10.50	126.42	0.088	12.50	389.58	0.0328	0.372727
C.japonica	D.hancocki	11.50	127.67	0.096	12.50	388.33	0.0329	0.342708
C.japonica	D.officina	11.50	127.67	0.096	12.50	388.33	0.0329	0.342708
C.japonica	D.huoshane	11.50	127.5	0.0961	11.50	388.5	0.0302	0.314256
B.juncea_n	B.umbellat	8.50	128.5	0.0692	13.50	387.5	0.0357	0.515896
B.juncea_n	F.hygromet	38.00	125.08	0.3895	25.00	390.92	0.0668	0.171502
B.juncea_n	C.tinctori	8.00	126.67	0.066	8.00	389.33	0.0208	0.315152
B.juncea_n	S.miltiorr	5.50	127.5	0.0444	5.50	388.5	0.0143	0.322072
B.juncea_n	C.sativa_n	6.50	127.33	0.0529	5.50	388.67	0.0143	0.270321
B.juncea_n	G.max_nad4	5.50	127.17	0.0445	6.50	388.83	0.0169	0.379775
B.juncea_n	D.hancocki	8.50	128.42	0.0693	12.50	387.58	0.033	0.47619
B.juncea_n	D.officina	8.50	128.42	0.0693	12.50	387.58	0.033	0.47619
B.juncea_n	D.huoshane	8.50	128.25	0.0694	11.50	387.75	0.0303	0.436599
B.umbellat	F.hygromet	39.50	126.58	0.4035	33.50	389.42	0.0914	0.226518
B.umbellat	C.tinctori	11.50	128.17	0.0956	17.50	387.83	0.0465	0.486402
B.umbellat	S.miltiorr	8.00	129	0.0647	12.00	387	0.0317	0.489954
B.umbellat	C.sativa_n	8.00	128.83	0.0648	10.00	387.17	0.0263	0.405864
B.umbellat	G.max_nad4	9.00	128.67	0.0734	13.00	387.33	0.0343	0.467302
B.umbellat	D.hancocki	4.00	129.92	0.0314	5.00	386.08	0.0131	0.417197
B.umbellat	D.officina	4.00	129.92	0.0314	5.00	386.08	0.0131	0.417197
B.umbellat	D.huoshane	4.00	129.75	0.0315	6.00	386.25	0.0157	0.498413
F.hygromet	C.tinctori	41.00	124.75	0.4325	17.00	391.25	0.0448	0.103584
F.hygromet	S.miltiorr	40.00	125.58	0.4146	24.00	390.42	0.0641	0.154607
F.hygromet	C.sativa_n	43.00	125.42	0.4582	26.00	390.58	0.0697	0.152117
F.hygromet	G.max_nad4	40.00	125.25	0.4161	27.00	390.75	0.0725	0.174237
F.hygromet	D.hancocki	36.50	126.5	0.3643	31.50	389.5	0.0856	0.234971
F.hygromet	D.officina	36.50	126.5	0.3643	31.50	389.5	0.0856	0.234971
F.hygromet	D.huoshane	36.50	126.33	0.3649	30.50	389.67	0.0827	0.226637
C.tinctori	S.miltiorr	5.50	127.17	0.0445	7.50	388.83	0.0195	0.438202
C.tinctori	C.sativa_n	9.50	127	0.0788	9.50	389	0.0248	0.314721
C.tinctori	G.max_nad4	9.50	126.83	0.0789	12.50	389.17	0.0328	0.415716
C.tinctori	D.hancocki	11.50	128.08	0.0956	14.50	387.92	0.0383	0.400628
C.tinctori	D.officina	11.50	128.08	0.0956	14.50	387.92	0.0383	0.400628
C.tinctori	D.huoshane	11.50	127.92	0.0958	13.50	388.08	0.0356	0.371608
S.miltiorr	C.sativa_n	6.00	127.83	0.0485	6.00	388.17	0.0156	0.321649
S.miltiorr	G.max_nad4	6.00	127.67	0.0485	7.00	388.33	0.0182	0.375258
S.miltiorr	D.hancocki	8.00	128.92	0.0648	9.00	387.08	0.0236	0.364198
S.miltiorr	D.officina	8.00	128.92	0.0648	9.00	387.08	0.0236	0.364198
S.miltiorr	D.huoshane	8.00	128.75	0.0649	8.00	387.25	0.0209	0.322034
C.sativa_n	G.max_nad4	7.00	127.5	0.057	5.00	388.5	0.013	0.22807
C.sativa_n	D.hancocki	8.00	128.75	0.0649	11.00	387.25	0.029	0.446841
C.sativa_n	D.officina	8.00	128.75	0.0649	11.00	387.25	0.029	0.446841
C.sativa_n	D.huoshane	8.00	128.58	0.0649	10.00	387.42	0.0263	0.405239
G.max_nad4	D.hancocki	9.00	128.58	0.0735	14.00	387.42	0.037	0.503401
G.max_nad4	D.officina	9.00	128.58	0.0735	14.00	387.42	0.037	0.503401
G.max_nad4	D.huoshane	9.00	128.42	0.0736	13.00	387.58	0.0343	0.466033
D.hancocki	D.officina	0.00	129.83	0	0.00	386.17	0	#DIV/0!
D.hancocki	D.huoshane	0.00	129.67	0	1.00	386.33	0.0026	#DIV/0!
D.officina	D.huoshane	0.00	129.67	0	1.00	386.33	0.0026	#DIV/0!

[truncated: 3 more sheets: nad6, nad9, rps3]
